# Supplementary material for: Muscle strength in adolescent men and future musculoskeletal pain: a cohort study with 17 years of follow-up
Source: PubMed Central journal article supplement — BMJ Open. 2013 May 24;3(5):e002656. doi: 10.1136/bmjopen-2013-002656 (PMC3668417; doi:10.1136/bmjopen-2013-002656), 2013-05-24
Supplement: bmjopen-2013-002656.draft_revisions.pdf [file bmjopen-2013-002656.draft_revisions.pdf]

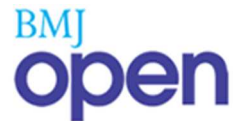

**Muscle Strength in Adolescent Men and Future  
Musculoskeletal Pain:  
A Cohort Study with 17 Years of Follow-up**

|                                    |                                                                                                                                                                                                                                                                                                                                                     |
|------------------------------------|-----------------------------------------------------------------------------------------------------------------------------------------------------------------------------------------------------------------------------------------------------------------------------------------------------------------------------------------------------|
| Journal:                           | <i>BMJ Open</i>                                                                                                                                                                                                                                                                                                                                     |
| Manuscript ID:                     | bmjopen-2013-002656                                                                                                                                                                                                                                                                                                                                 |
| Article Type:                      | Research                                                                                                                                                                                                                                                                                                                                            |
| Date Submitted by the Author:      | 30-Jan-2013                                                                                                                                                                                                                                                                                                                                         |
| Complete List of Authors:          | Timpka, Simon; Lund University, Department of Orthopedics<br>Pettersson, Ingemar; Lund University, Department of Orthopedics<br>Zhou, Caddie; Lund University, Department of Orthopedics<br>Englund, Martin; Lund University, Department of Orthopedics; Boston<br>University School of Medicine, Clinical Epidemiology Research & Training<br>Unit |
| <b>Primary Subject<br>Heading</b>: | Epidemiology                                                                                                                                                                                                                                                                                                                                        |
| Secondary Subject Heading:         | Sports and exercise medicine, Rheumatology, Public health                                                                                                                                                                                                                                                                                           |
| Keywords:                          | Musculoskeletal disorders < ORTHOPAEDIC & TRAUMA SURGERY, SPORTS<br>MEDICINE, PREVENTIVE MEDICINE                                                                                                                                                                                                                                                   |
|                                    |                                                                                                                                                                                                                                                                                                                                                     |

SCHOLARONE™  
Manuscripts

1  
2  
3  
4  
5  
6  
7  
8  
9  
10  
11  
12  
13  
14  
15  
16

# Muscle Strength in Adolescent Men and Future Musculoskeletal Pain:

## A Cohort Study with 17 Years of Follow-up

17  
18  
19  
20  
21  
22  
23  
24  
25  
26  
27  
28  
29  
30  
31  
32  
33  
34

Simon Timpka<sup>1</sup>, Ingemar F Petersson<sup>1</sup>, Caddie Zhou<sup>1</sup>, Martin Englund<sup>1, 2</sup>

1 Department of Orthopedics, Clinical Sciences Lund, Lund University, Lund, Sweden

2 Clinical Epidemiology Research & Training Unit, Boston, University School of Medicine, Boston, Massachusetts, United States of America

35  
36  
37  
38  
39  
40  
41  
42  
43  
44  
45  
46  
47  
48  
49  
50  
51  
52  
53  
54  
55  
56  
57  
58  
59  
60

Corresponding author:

Simon Timpka  
Skånes universitetssjukhus  
Epi-centrum Skåne  
Medicon Village  
223 81 Lund  
Sweden

Phone: +46 738 395 276  
Mail: [simon.timpka@med.lu.se](mailto:simon.timpka@med.lu.se)

Words in main text: 2800  
Number of figures: 1  
Number of tables: 2

## Abstract

### Objectives

Musculoskeletal pain is highly prevalent throughout adulthood with a major impact on health, function and participation in the society. Still, the association between muscle strength and development of musculoskeletal pain is unclear. We aimed to study whether overall muscle strength in adolescent men is associated with self-reported musculoskeletal pain in adulthood.

### Design

Cohort study with baseline data from the Swedish Conscription Register and outcome information from the random population-based Swedish Living Conditions Surveys.

### Setting

Sweden, 1970-2005.

### Participants

We studied 5492 men who at age 17-19 years tested their isometric muscle strength (hand grip, arm flexion, knee extension) during the compulsory conscription.

### Outcome measures

The men were surveyed regarding self-reported musculoskeletal pain; mean follow-up time of 17 (range 1-35) years. Our primary outcome was a self-report of musculoskeletal pain, and secondary outcomes were a report of "severe pain", "pain in back/hips", "pain in neck/shoulders", or "pain in arms/legs", respectively. We categorized muscle strength into three groups; low, average, and high using the 25th to 75th percentile to define the reference category (average). We calculated incidence rate ratios using log binomial regression with adjustment for smoking, body mass index, education, and physical activity.

### Results

1  
2  
3 In the adjusted model, men with low overall muscle strength had decreased risk of self-reported  
4 musculoskeletal pain (incidence rate ratio 0.93, 95% confidence interval 0.87-0.99). We observed no  
5 such association in men with high strength (0.99, 0.93-1.05). Furthermore, no statistically significant  
6 increase or decrease in risk was observed for any of the secondary outcomes.  
7  
8  
9  
10

### 11 **Conclusion**

12  
13  
14 In men, low overall isometric muscle strength in youth was not associated with an increased risk of  
15 future musculoskeletal pain. Contrarily, we observed a slightly decreased risk of self-reported  
16 musculoskeletal pain in adulthood. Residual confounding by adult occupational exposures, leisure  
17 time physical activity level and psychosocial factors may have impacted on results.  
18  
19  
20  
21  
22  
23  
24  
25  
26  
27  
28  
29  
30  
31  
32  
33  
34  
35  
36  
37  
38  
39  
40  
41  
42  
43  
44  
45  
46  
47  
48  
49  
50  
51  
52  
53  
54  
55  
56  
57  
58  
59  
60

## Article summary

### Article focus

- We aimed to study whether overall muscle strength in youth is inversely associated with the development of musculoskeletal pain in adulthood.

### Key messages

- In contradiction to our expectations, we observed a decreased risk of self-reported musculoskeletal pain in adult men with low overall isometric muscle strength in youth.
- Low muscle strength may potentially serve as a deselection criterion for activities with high risk of acute injuries or chronic physical overload, factors with negative impact on musculoskeletal health.

### Strengths and limitations of study

- The main strengths of the study are a large sample, the use of three different measures of muscle strength, and comparably long time to follow-up.
- The main limitations of the study are the following; the cohort does not include women, musculoskeletal pain only identified with one question per site, motivation for military service might influence measurement of muscle strength and the potential for unmeasured or residual confounding.

## Introduction

Musculoskeletal disorders (MSDs), such as low back pain, osteoarthritis, and widespread pain, are highly prevalent in the adult population.<sup>1-3</sup> MSDs also contribute to a substantial burden of disease at middle and older ages.<sup>4</sup> Although pain emanating from the musculoskeletal system might be attributed to a wide range of diseases with diverse causal chains, many MSDs have common risk factors such as heavy occupational work load,<sup>5,6</sup> a high body mass index (BMI),<sup>7-9</sup> and a low socio-economy.<sup>10-12</sup> Although smoking in some studies have been identified as a risk factor for certain MSDs,<sup>13,14</sup> its main effect on musculoskeletal pain might be as an effect modifier of the pain sensation.<sup>15</sup> As physical work load is a risk factor for many MSDs,<sup>16</sup> a model in which muscle strength in the loaded parts of the body are protective for future disorders is appealing. Furthermore, physical exercise with focus on muscle strength is an important secondary and tertiary prevention of MSDs.<sup>17</sup>

<sup>18</sup> A handful of studies have hitherto longitudinally investigated the strength of isolated muscle groups in adulthood as a determinant of later MSDs.<sup>19-22</sup> However, in adult subjects, there is for the time being conflicting evidence of the value of muscle strength as a protective factor of musculoskeletal pain, such as neck/shoulder pain and low back pain.<sup>19</sup>

In the longer perspective, relatively little is known about the association of muscle strength in youth and later disease, including musculoskeletal pain.<sup>23</sup> Two studies have investigated the result of single muscle strength tests as determinants of musculoskeletal complaints decades later.<sup>24,25</sup> The first, using number of sit-ups during 30 seconds as a strength measure, found no association with later low back pain or tension neck in men. In women, the high strength group had a decreased odds ratio (OR) of tension neck.<sup>24</sup> The second study found a decreased OR for MSDs in men who either had a strong performance in isotonic bench press or in a isometric two hand lift test.<sup>25</sup> Neither of the two studies includes a measure of overall muscular capacity. In summary, although there is some evidence of an association between low muscle strength in youth and later risk of MSDs, the association between overall muscle strength in adolescence and later musculoskeletal pain has not

1  
2  
3 been studied. Furthermore, with a larger sample size, data on common risk factors, testing of three  
4  
5 different muscle groups, and data on physical work capacity, we address some of the limitations of  
6  
7 earlier studies.  
8  
9

10 Our aim in this study was to investigate the general muscle strength in adolescent males as a  
11  
12 determinant of later self-reported musculoskeletal pain. We hypothesized that low general muscle  
13  
14 strength in youth is associated with an increased risk of having musculoskeletal pain in adulthood.  
15  
16

## 17 **Methods**

20 We used two main two main criteria to identify the study cohort. First, the subjects should have  
21  
22 performed mandatory conscription testing in Sweden between 1970-1994, with the exception of the  
23  
24 years 1978 and 1985. Secondly, they should have been included in the Swedish Living Conditions  
25  
26 Surveys any year between 1980 and 2005 when questions regarding musculoskeletal problems,  
27  
28 smoking status, and physical activity were simultaneously included.  
29  
30

31  
32 Furthermore, we excluded all men who were surveyed prior to the baseline testing or were younger  
33  
34 than 17 years or older than 19 years at baseline (Table 1). We also excluded men with an existing  
35  
36 musculoskeletal disorder (Diseases of the musculoskeletal system and connective tissue according to  
37  
38 the International classification of disease version 8 or 9) and those who had missing data on variables  
39  
40 included in the primary model (muscle strength, smoking, BMI, physical activity, level of education).  
41  
42

43 In the final study sample we included 5492 men (figure 1). Data from the Swedish conscription  
44  
45 testing has been previously used for research purposes.<sup>26-28</sup> During the period of the study sample  
46  
47 testing, conscription was mandatory by law for all Swedish men. Specially trained employees at six  
48  
49 regional conscription centers administrated the conscription tests during a two-day session that also  
50  
51 included separate evaluations by a medical doctor and a psychologist. Only men with serious health  
52  
53 complaints, were excused from conscription. The procedure included measurements of each  
54  
55 subject's weight in underwear to the kilogram and height without shoes to the centimeter. Using  
56  
57  
58  
59  
60

1  
2  
3 height and weight, we calculated BMI as height/kg<sup>2</sup>. Probably due to rare errors of data entry, there  
4  
5 are unlikely extreme values in the dataset. Therefore, we excluded all subjects with registered  
6  
7 extreme values on height (<150, >210 cm), weight (<40, >150 kg), or an extreme calculated value for  
8  
9 BMI (<15, >60) (figure 1). The study was approved by the Ethical Review Board at Lund University  
10  
11 and the manuscript was prepared according to the STROBE-statement.<sup>29</sup>  
12

### 13 *Muscle strength*

14  
15 The men performed three tests of isometric muscle strength during conscription; hand grip, elbow  
16  
17 flexion, and knee extension. At the start of test period in 1970, the tests were performed as  
18  
19 previously described<sup>30</sup> and remained unchanged in general throughout the test period. In summary,  
20  
21 hand grip was measured with a 90° flexion at the elbow with the humerus in parallel to the torso.  
22  
23 Knee extension was measured in a sitting position with 90° knee flexion and arms crossed over chest.  
24  
25 The pelvis was fixed to the seat and a strap fastened above the lateral malleolus. Also, elbow flexion  
26  
27 was measured in a sitting position with 90° flexion at the elbow and the humerus in parallel to the  
28  
29 torso. A strap was fastened at the level of the radial styloid process.  
30  
31

32  
33 We calculated a measure of general muscle strength by standardizing and combining the three tests  
34  
35 of muscle strength. To avoid bias due to change of testing procedure over time, we categorized the  
36  
37 cohort into five subgroups based on period of conscription (1970-1973, 1974-1977, 1979-1984, 1986-  
38  
39 1990, 1990-1994) and for each subgroup calculated the relative muscle strength. We standardized  
40  
41 the three tests of muscle strength [standardized value= (value–mean)/standard deviation] within  
42  
43 each subgroup and used the mean of the three test scores as a proxy for general muscle strength.  
44  
45 Using percentiles, we then categorized the cohort into three groups of muscle strength, where the  
46  
47 25<sup>th</sup> to 75<sup>th</sup> percentile defined the average category, the bottom 25<sup>th</sup> percentile configured the low  
48  
49 category, and the top 25<sup>th</sup> percentile defined the high muscle strength category.  
50  
51

### 52 **Survey of musculoskeletal pain**

53  
54  
55 The Swedish Living Conditions Surveys (ULF) is a random population based survey conducted by  
56  
57 Statistics Sweden, previously used for research purposes.<sup>31-33</sup> For the present study, we used data  
58  
59  
60



1  
2  
3 collected during a total of 10 years (1980, 1988, 1989, 1997-1999, 2002-2005). The surveys were  
4  
5 generally performed as interviews in person by trained interviewers, with a minority of the  
6  
7 interviews performed by phone. For men included in more than one survey, we used the last survey  
8  
9 without relevant study data missing.  
10

11 At follow-up, the men were asked three questions regarding any current musculoskeletal pain: 1) Do  
12  
13 you have pain in neck or shoulders? 2) Do you have back-pain, hip-pain or sciatica? 3) Do you have  
14  
15 ache, pain in hands, elbows, legs or knees? For each type of complaint one of three answers was  
16  
17 possible: 1) Yes, severe 2) Yes, mild and 3) No. Our primary outcome was having reported either  
18  
19 severe or mild musculoskeletal pain, whereas our secondary outcomes we defined as follows: 1)  
20  
21 Having reported severe musculoskeletal pain 2) Having reported pain in back/hips 3) Having reported  
22  
23 pain in shoulders/neck 4) Having reported pain in arms/legs. From the surveys, we also included data  
24  
25 on self-reported current smoking status (yes/no), physical activity (practically none, now and then,  
26  
27 regularly, regularly strenuous), and level of education (compulsory school or less, secondary  
28  
29 education, higher education). Drop-outs from the survey, i.e. those who have declined participation,  
30  
31 cannot be individually identified. However, of the men who were asked to be included in the relevant  
32  
33 age-groups, 11.3-31.0% declined participation in the years of study. The mean rate of non-  
34  
35 participation over the relevant years in the same group was 22.9%.  
36  
37  
38  
39  
40  
41  
42  
43  
44  
45  
46  
47  
48  
49  
50  
51  
52  
53  
54  
55  
56  
57  
58  
59  
60

### Statistical analyses

All analyses were performed with SAS 9.3 (SAS Institute Inc). We used logistic binomial regression to estimate incidence rate ratios (IRR) and control potential confounders. In the multivariate model (primary model), we included muscle strength, BMI, smoking status, physical activity and level of education.

To test whether cardiovascular aspects of physical capacity confounded our results, we used physical work capacity measured as  $W_{\max 6 \text{ min}}$  in a sensitivity analysis. For  $W_{\max 6 \text{ min}}$ , the test result is an estimate of maximum work sustainable for 6 minutes<sup>34</sup> and is in young men correlated with maximum oxygen uptake ( $r=0.9$ ).<sup>35 36</sup> Acceptable data quality on work capacity was available in the subsample of men performing the baseline testing in 1976-1982. Out of all men in the cohort conscripted during the time period, 1154 men (74.6 %) completed an acceptable physical work capacity test on a bicycle ergometer (i.e. heart rate  $>174$  at the end of testing). We added the work capacity in relation to body weight as a continuous variable to the univariate model. Furthermore, we also performed two sensitivity analyses on the multivariate model with musculoskeletal pain as the dependent variable. In the first, we added test center to the model. For the second, to test whether our categorization of muscle strength influenced the results, we 1) treated the standardized muscle strength as a continuous variable 2) treated the standardized muscle strength as a categorical variable based on quintiles.

## Results

The mean time to follow-up was 17 years (table 1). Men with low muscle strength did not have an increased risk, but rather a statistically significant decreased risk, for the primary outcome "Musculoskeletal pain" (table 2). To summarize the observations of the secondary outcomes, we did not observe any statistically significant risk increases for neither men with a low nor high muscle strength. Compared to the crude model, the multivariate model produced similar risk estimates.

### *Sensitivity analyses*

Work capacity had a significant effect in the subsample analysis ( $p=0.04$ ) whereas it had only minor effect on the risk estimates for a musculoskeletal problem, being 0.94 (0.82-1.08) and 1.02 (0.90-1.16) for low and high strength, respectively. The pattern of association in the secondary outcomes were in general somewhat strengthened when we adjusted for work capacity (data not shown).

Using muscle strength as a continuous variable (hence assuming a linear relationship) did weaken the association with later musculoskeletal pain ( $p=0.22$ ). When we instead used quintiles to categorize muscle strength, we observed no increased risk for the group with lowest strength compared to average strength (IRR=0.93, 95% confidence interval 0.85-1.01).

## Discussion

Investigating the overall isometric muscle strength in adolescent men as a determinant of future musculoskeletal pain, we observed a decreased risk of self-reported musculoskeletal pain in men with low muscle strength. No such association was observed for men with high strength. We also found a similar, however not statistically significant, pattern for "pain in back/hips" and "pain in neck/shoulders", whereas no association was found for future problems in arms/legs. Noticeably the observed associations were in contradiction to our expectations.

1  
2  
3 Using a historical cohort design with prospective registration of exposure and the outcome, our study  
4  
5 includes a large sample and thus allows better control for known confounders compared to previous  
6  
7 studies. All covariates (muscle strength, BMI, smoking, education, physical activity) included in the  
8  
9 multivariate model for musculoskeletal pain also had a significant association with the outcome.

10  
11 Furthermore, by controlling for work capacity, we aimed to isolate the direct effect of muscle  
12  
13 strength from other aspects of physical capacity. However, the study also has important limitations.

14  
15 First and foremost, we have used strength data from military conscription testing. Although it  
16  
17 provides a rich dataset from a structured environment, we do not know how the subject's motivation  
18  
19 for military service may have biased the performance during the testing procedure. However,  
20  
21 assuming there is no association between motivation at conscription testing and later risk of  
22  
23 musculoskeletal pain (or the loss to follow-up) any bias would at most dilute our result. Nevertheless,  
24  
25 stronger recruits are more likely to be assigned to positions with heavy load duty. Secondly, the  
26  
27 conscription was mandatory for men only. As the pattern of physical activity and occupational  
28  
29 exposure differ between men and women, any generalization of the results to women must be made  
30  
31 with great caution. Third, the physical activity measurement consisted of a single question and did  
32  
33 neither allow calculation of metabolic equivalent of task (MET) nor included occupational exposure.  
34  
35 Also musculoskeletal pain is measured by questions that combine more than one site, decreasing the  
36  
37 precision. However, the categories are fairly well demarcated anatomically save for the question  
38  
39 regarding pain in arms/legs. Fourth, the covariates collected with musculoskeletal pain at follow-up  
40  
41 (smoking, physical activity, level of education) are cross-sectional and might thus be mediators of  
42  
43 reverse causation. However, the adjusted estimates are much in line with the crude estimates.  
44  
45  
46  
47  
48

49 It has been suggested that there is a U-shaped association between physical activity and later back  
50  
51 pain.<sup>37 38</sup> Furthermore, as former occupational exposure and certain sport participation are  
52  
53 established risk factors for future MSDs,<sup>16 39</sup> it lends some evidence for a more general model, in  
54  
55 which certain forms of physical activity is negative for the musculoskeletal health. Primarily, our  
56  
57 observations do not support low muscle strength in youth as a risk factor for later musculoskeletal  
58  
59  
60

1  
2  
3 pain. Instead, we suggest that our results can be explained by muscle strength in youth being one  
4  
5 selection criterion for future high risk activities with a negative influence on the musculoskeletal  
6  
7 health, e.g. higher risk of joint injury due to sports participation or manual repetitive work load. This  
8  
9 would also include more immediate exposure such as more physically demanding military service.<sup>40</sup>  
10  
11 Although we have controlled for level of education, which might serve as a proxy for occupational  
12  
13 exposure, there is potential for residual confounding as we did not have more appropriate data. In  
14  
15 other words, individuals with low general muscle strength might to a certain degree be deselected  
16  
17 for high risk activities compared to men with an average or high strength. However, the strength of  
18  
19 an individual is associated with the muscle fiber type distribution, which have a large genetic  
20  
21 component.<sup>41</sup> Type I fibers are more common in endurance athletes<sup>42</sup> whereas high type II  
22  
23 percentage have been reported to be associated with isometric muscle strength<sup>43</sup> as well as low back  
24  
25 pain.<sup>44</sup> Thus, we cannot exclude that the decreased risk observed in men with low strength is  
26  
27 mediated by factors related to muscle fiber type.  
28  
29

30  
31 Partly in contrast with a previous study,<sup>25</sup> we did not observe a negative effect of low muscle  
32  
33 strength on the risk future of musculoskeletal problems in men. Although we in the present study  
34  
35 only include measurements of isometric strength, the previous study observed associations with  
36  
37 both an isometric strength measure (static two hand lift) and an isotonic strength measure (bench  
38  
39 press). In a study on the same cohort, it is reported that the result in bench press, but not two hand  
40  
41 lift, was associated with both future cardiovascular fitness and future physical activity,<sup>45</sup> potentially  
42  
43 explaining part of the difference. As another study reported flexibility as a sit and reach test,<sup>24</sup> but  
44  
45 not strength measured as sit-ups, to be negatively associated with future risk of back pain, it is  
46  
47 possible that other aspects of muscular and musculoskeletal function is of greater importance of  
48  
49 future risk of MSDs than isometric muscle strength.  
50  
51

52  
53  
54 The association between muscle strength and later musculoskeletal pain diminished when we used  
55  
56 muscle strength as a continuous variable. This was not surprising, as the observed association was  
57  
58  
59  
60

1  
2  
3 non linear in the primary model. It is to be expected that the test centers differ somewhat in their  
4 reported test results, as they were assigned adolescents based on geography. However, including  
5 test centers in the model did not have any effect on the overall association. When we included work  
6 capacity in the model, most risk estimates decreased in absolute values, furthering strengthening the  
7 observations in the primary model. By using the relative muscle strength during testing periods of  
8 five years, we partially address the potential systematic change in testing procedure over the years.  
9 Although the methods of measurements have not changed at large, minor adjustments cannot be  
10 excluded.  
11  
12  
13  
14  
15  
16  
17  
18  
19

20  
21 Although we found no increased risk of future musculoskeletal problems in men with low muscle  
22 strength in adolescence, future studies need to better quantify the occupational exposure and leisure  
23 time physical activity. Since the physical activity pattern and physical fitness profiles differ between  
24 men and women, further investigations are also needed to investigate if similar associations can be  
25 found in women.  
26  
27  
28  
29  
30  
31

32 We observed a decreased risk of self-reported musculoskeletal pain in adult men with low overall  
33 isometric muscle strength in youth. We hypothesize that low muscle strength *per se* is not protective  
34 of future musculoskeletal pain. Instead, low muscle strength might serve as a deselection criterion  
35 for professions or types of leisure time physical activity with higher risk of acute injuries or chronic  
36 physical overload, factors with negative impact on musculoskeletal health.  
37  
38  
39  
40  
41  
42  
43

## 44 **Acknowledgements**

45  
46  
47 No author has a conflict of interest to report. The authors would like to thank Charlotte Bergknut for  
48 the initial data management.  
49  
50  
51  
52  
53  
54  
55  
56  
57  
58  
59  
60

## Funding

The authors are supported by grants from The Swedish Research Council, Skåne Regional Council, and the Faculty of Medicine at Lund University. The funders neither influenced the study process nor manuscript preparation.

## Author contributions

ST proposed the study idea, collected data, designed the study, and drafted the manuscript. IP designed the study and provided input during manuscript preparation. CZ designed the study and performed the statistical analyses. ME designed the study, collected data, and provided input during manuscript preparation. All authors approved the final version of the manuscript.

## Data sharing statement

No additional data to share.

## Competing Interests

None

## References

1. Bergman S, Herrstrom P, Hogstrom K, Petersson IF, Svensson B, Jacobsson LT. Chronic musculoskeletal pain, prevalence rates, and sociodemographic associations in a Swedish population study. *J Rheumatol* 2001;28(6):1369-77.
2. Picavet HS, Schouten JS. Musculoskeletal pain in the Netherlands: prevalences, consequences and risk groups, the DMC(3)-study. *Pain* 2003;102(1-2):167-78.
3. Urwin M, Symmons D, Allison T, Brammah T, Busby H, Roxby M, et al. Estimating the burden of musculoskeletal disorders in the community: the comparative prevalence of symptoms at

- 1  
2  
3 different anatomical sites, and the relation to social deprivation. *Ann Rheum Dis*  
4  
5 1998;57(11):649-55.  
6  
7 4. Murray CJ, Vos T, Lozano R, Naghavi M, Flaxman AD, Michaud C, et al. Disability-adjusted life years  
8  
9 (DALYs) for 291 diseases and injuries in 21 regions, 1990-2010: a systematic analysis for the  
10  
11 Global Burden of Disease Study 2010. *Lancet* 2013;380(9859):2197-223.  
12  
13 5. van der Windt DA, Thomas E, Pope DP, de Winter AF, Macfarlane GJ, Bouter LM, et al.  
14  
15 Occupational risk factors for shoulder pain: a systematic review. *Occup Environ Med*  
16  
17 2000;57(7):433-42.  
18  
19 6. Hoogendoorn WE, van Poppel MN, Bongers PM, Koes BW, Bouter LM. Physical load during work  
20  
21 and leisure time as risk factors for back pain. *Scand J Work Environ Health* 1999;25(5):387-  
22  
23 403.  
24  
25 7. Felson DT, Zhang Y, Hannan MT, Naimark A, Weissman B, Aliabadi P, et al. Risk factors for incident  
26  
27 radiographic knee osteoarthritis in the elderly: the Framingham Study. *Arthritis Rheum*  
28  
29 1997;40(4):728-33.  
30  
31 8. Shiri R, Karppinen J, Leino-Arjas P, Solovieva S, Viikari-Juntura E. The association between obesity  
32  
33 and low back pain: a meta-analysis. *Am J Epidemiol* 2010;171(2):135-54.  
34  
35 9. Grotle M, Hagen KB, Natvig B, Dahl FA, Kvien TK. Obesity and osteoarthritis in knee, hip and/or  
36  
37 hand: an epidemiological study in the general population with 10 years follow-up. *BMC*  
38  
39 *Musculoskelet Disord* 2008;9:132.  
40  
41 10. Hagen K, Zwart JA, Svebak S, Bovim G, Jacob Stovner L. Low socioeconomic status is associated  
42  
43 with chronic musculoskeletal complaints among 46,901 adults in Norway. *Scand J Public*  
44  
45 *Health* 2005;33(4):268-75.  
46  
47 11. Dalstra JA, Kunst AE, Borrell C, Breeze E, Cambois E, Costa G, et al. Socioeconomic differences in  
48  
49 the prevalence of common chronic diseases: an overview of eight European countries. *Int J*  
50  
51 *Epidemiol* 2005;34(2):316-26.  
52  
53  
54  
55  
56  
57  
58  
59  
60



- 1  
2  
3 12. Bengtsson C, Nordmark B, Klareskog L, Lundberg I, Alfredsson L. Socioeconomic status and the  
4 risk of developing rheumatoid arthritis: results from the Swedish EIRA study. *Ann Rheum Dis*  
5 2005;64(11):1588-94.  
6  
7  
8  
9 13. Palmer KT, Syddall H, Cooper C, Coggon D. Smoking and musculoskeletal disorders: findings from  
10 a British national survey. *Ann Rheum Dis* 2003;62(1):33-6.  
11  
12  
13 14. Holth HS, Werpen HK, Zwart JA, Hagen K. Physical inactivity is associated with chronic  
14 musculoskeletal complaints 11 years later: results from the Nord-Trondelag Health Study.  
15 *BMC Musculoskelet Disord* 2008;9:159.  
16  
17  
18 15. McBeth J, Jones K. Epidemiology of chronic musculoskeletal pain. *Best Pract Res Clin Rheumatol*  
19 2007;21(3):403-25.  
20  
21  
22 16. Roquelaure Y, Ha C, Rouillon C, Fouquet N, Leclerc A, Descatha A, et al. Risk factors for upper-  
23 extremity musculoskeletal disorders in the working population. *Arthritis Rheum*  
24 2009;61(10):1425-34.  
25  
26  
27 17. Hakkinen A, Sokka T, Kotaniemi A, Hannonen P. A randomized two-year study of the effects of  
28 dynamic strength training on muscle strength, disease activity, functional capacity, and bone  
29 mineral density in early rheumatoid arthritis. *Arthritis Rheum* 2001;44(3):515-22.  
30  
31  
32 18. Baker KR, Nelson ME, Felson DT, Layne JE, Sarno R, Roubenoff R. The efficacy of home based  
33 progressive strength training in older adults with knee osteoarthritis: a randomized  
34 controlled trial. *J Rheumatol* 2001;28(7):1655-65.  
35  
36  
37 19. Hamberg-van Reenen HH, Ariens GA, Blatter BM, van Mechelen W, Bongers PM. A systematic  
38 review of the relation between physical capacity and future low back and neck/shoulder  
39 pain. *Pain* 2007;130(1-2):93-107.  
40  
41  
42 20. Leino P, Aro S, Hasan J. Trunk muscle function and low back disorders: a ten-year follow-up study.  
43 *J Chronic Dis* 1987;40(4):289-96.  
44  
45  
46  
47  
48  
49  
50  
51  
52  
53  
54  
55  
56  
57  
58  
59  
60

- 1  
2  
3 21. Kujala UM, Taimela S, Viljanen T, Jutila H, Viitasalo JT, Videman T, et al. Physical loading and  
4 performance as predictors of back pain in healthy adults. A 5-year prospective study. *Eur J*  
5 *Appl Physiol Occup Physiol* 1996;73(5):452-8.  
6  
7  
8  
9 22. Faber A, Sell L, Hansen JV, Burr H, Lund T, Holtermann A, et al. Does muscle strength predict  
10 future musculoskeletal disorders and sickness absence? *Occupational medicine (Oxford,*  
11 *England)* 2012;62(1):41-6.  
12  
13  
14  
15 23. Ruiz JR, Castro-Pinero J, Artero EG, Ortega FB, Sjostrom M, Suni J, et al. Predictive validity of  
16 health-related fitness in youth: a systematic review. *Br J Sports Med* 2009;43(12):909-23.  
17  
18  
19  
20 24. Mikkelsen LO, Nupponen H, Kaprio J, Kautiainen H, Mikkelsen M, Kujala UM. Adolescent  
21 flexibility, endurance strength, and physical activity as predictors of adult tension neck, low  
22 back pain, and knee injury: a 25 year follow up study. *Br J Sports Med* 2006;40(2):107-13.  
23  
24  
25  
26 25. Barnekow-Bergkvist M, Hedberg GE, Janlert U, Jansson E. Determinants of self-reported neck-  
27 shoulder and low back symptoms in a general population. *Spine (Phila Pa 1976)*  
28 1998;23(2):235-43.  
29  
30  
31  
32 26. Neovius M, Sundstrom J, Rasmussen F. Combined effects of overweight and smoking in late  
33 adolescence on subsequent mortality: nationwide cohort study. *BMJ* 2009;338:b496.  
34  
35  
36  
37 27. Nilsson PM, Nyberg P, Ostergren PO. Increased susceptibility to stress at a psychological  
38 assessment of stress tolerance is associated with impaired fetal growth. *Int J Epidemiol*  
39 2001;30(1):75-80.  
40  
41  
42  
43 28. Hemmingsson T, Melin B, Allebeck P, Lundberg I. The association between cognitive ability  
44 measured at ages 18-20 and mortality during 30 years of follow-up--a prospective  
45 observational study among Swedish males born 1949-51. *Int J Epidemiol* 2006;35(3):665-70.  
46  
47  
48  
49 29. von Elm E, Altman DG, Egger M, Pocock SJ, Gotsche PC, Vandenbroucke JP. Strengthening the  
50 Reporting of Observational Studies in Epidemiology (STROBE) statement: guidelines for  
51 reporting observational studies. *BMJ* 2007;335(7624):806-8.  
52  
53  
54  
55  
56  
57  
58  
59  
60

- 1  
2  
3 30. Nordesjo LO, Schéle R. Validity of Ergometer Cycle Test and Measures of Isometric Muscle  
4  
5 Strength when Predicting some Aspects of Military Performance. *Swedish J Defence Med*  
6  
7 1974(10):11-23.  
8  
9  
10 31. Wolk A, Rossner S. Effects of smoking and physical activity on body weight: developments in  
11  
12 Sweden between 1980 and 1989. *J Intern Med* 1995;237(3):287-91.  
13  
14 32. Sundquist J, Johansson SE. The influence of socioeconomic status, ethnicity and lifestyle on body  
15  
16 mass index in a longitudinal study. *Int J Epidemiol* 1998;27(1):57-63.  
17  
18 33. Bygren LO, Konlaan BB, Johansson SE. Attendance at cultural events, reading books or  
19  
20 periodicals, and making music or singing in a choir as determinants for survival: Swedish  
21  
22 interview survey of living conditions. *BMJ* 1996;313(7072):1577-80.  
23  
24 34. Tornvall G. Assessment of physical capabilities. *Acta physiologica Scandinavica* 1963;58(Suppl  
25  
26 201):1-102.  
27  
28 35. Nordesjo LO. A comparison between the Thornvall maximal ergometer test, submaximal  
29  
30 ergometer tests and maximal oxygen uptake. *Swedish J Defence Med* 1974(10):3-10.  
31  
32 36. Nordesjo LO. Estimation of the maximal work rate sustainable for 6 minutes using a single-level  
33  
34 load or stepwise increasing loads. *Ups J Med Sci* 1974;79(1):45-50.  
35  
36 37. Heneweer H, Vanhees L, Picavet HS. Physical activity and low back pain: a U-shaped relation?  
37  
38  
39 *Pain* 2009;143(1-2):21-5.  
40  
41 38. Heneweer H, Picavet HS, Staes F, Kiers H, Vanhees L. Physical fitness, rather than self-reported  
42  
43 physical activities, is more strongly associated with low back pain: evidence from a working  
44  
45 population. *Eur Spine J* 2012;21(7):1265-72.  
46  
47 39. Kujala UM, Kettunen J, Paananen H, Aalto T, Battie MC, Impivaara O, et al. Knee osteoarthritis in  
48  
49 former runners, soccer players, weight lifters, and shooters. *Arthritis Rheum* 1995;38(4):539-  
50  
51 46.  
52  
53 40. Almeida SA, Williams KM, Shaffer RA, Brodine SK. Epidemiological patterns of musculoskeletal  
54  
55 injuries and physical training. *Med Sci Sports Exerc* 1999;31(8):1176-82.  
56  
57  
58  
59  
60

- 1  
2  
3 41. Simoneau JA, Bouchard C. Genetic determinism of fiber type proportion in human skeletal  
4 muscle. *FASEB J* 1995;9(11):1091-5.  
5  
6  
7 42. Costill DL, Daniels J, Evans W, Fink W, Krahenbuhl G, Saltin B. Skeletal muscle enzymes and fiber  
8 composition in male and female track athletes. *J Appl Physiol* 1976;40(2):149-54.  
9  
10  
11 43. Tesch P, Karlsson J. Isometric strength performance and muscle fibre type distribution in man.  
12 *Acta physiologica Scandinavica* 1978;103(1):47-51.  
13  
14  
15 44. Mannion AF, Weber BR, Dvorak J, Grob D, Muntener M. Fibre type characteristics of the lumbar  
16 paraspinal muscles in normal healthy subjects and in patients with low back pain. *J Orthop*  
17 *Res* 1997;15(6):881-7.  
18  
19  
20  
21  
22 45. Barnekow-Bergkvist M, Hedberg G, Janlert U, Jansson E. Prediction of physical fitness and  
23 physical activity level in adulthood by physical performance and physical activity in  
24 adolescence--an 18-year follow-up study. *Scand J Med Sci Sports* 1998;8(5 Pt 1):299-308.  
25  
26  
27  
28  
29  
30  
31  
32

## 33 Tables and Figures

34  
35 **Table 1:** Description of study sample  
36

37 **Table 2:** Risk estimates for the muscle strength in youth as a determinant of self-reported  
38 musculoskeletal pain in adulthood  
39  
40

41 **Figure 1:** The identification of the study sample and the loss to follow-up  
42  
43  
44  
45  
46  
47  
48  
49  
50  
51  
52  
53  
54  
55  
56  
57  
58  
59  
60

**Table 1** Description of study sample

|                                           |                        |
|-------------------------------------------|------------------------|
| <b>Mean age at baseline</b> (SD)          | 18.2 (0.5)             |
| <b>Mean time to follow-up</b> (SD, range) | 17.2 years (8.4, 1-35) |
| <b>BMI</b> (%)                            |                        |
| <18.5                                     | 477 (8.7)              |
| 18.5-24.9                                 | 4500 (81.9)            |
| 25-29.9                                   | 448 (8.2)              |
| >30                                       | 67 (1.2)               |
| <b>Muscle Strength*</b> (%)               |                        |
| Low                                       | 1371 (25.0)            |
| Average                                   | 2745 (50.0)            |
| High                                      | 1371 (25.0)            |
| <b>Type of interview</b> (%)              |                        |
| In person                                 | 4351 (79.2)            |
| By telephone                              | 1141 (20.8)            |
| <b>Pain in back/hips</b> (%)              |                        |
| Yes                                       | 1647 (30.0)            |
| Yes, severe                               | 321 (5.8)              |
| No                                        | 3843 (70.0)            |
| Missing                                   | 2 (0.0)                |
| <b>Pain in neck/shoulders</b> (%)         |                        |
| Yes                                       | 1564 (28.5)            |
| Yes, severe                               | 247 (4.5)              |
| No                                        | 3926 (71.5)            |
| Missing                                   | 2 (0.0)                |
| <b>Pain in arms/legs</b> (%)              |                        |
| Yes                                       | 1243 (22.6)            |
| Yes, severe                               | 196 (3.6)              |
| No                                        | 4246 (77.4)            |
| Missing                                   | 3 (0.0)                |
| <b>Pain, independent of location</b> (%)  |                        |
| Yes                                       | 2850 (51.9)            |
| Yes, severe                               | 576 (10.0)             |
| No                                        | 2639 (48.1)            |
| Missing                                   | 3 (0.0)                |
| <b>Smoking status</b> (%)                 |                        |
| Yes                                       | 827 (15.1)             |
| No                                        | 4665 (84.9)            |
| <b>Level of education</b> (%)             |                        |
| Compulsory                                | 582 (10.6)             |
| Secondary                                 | 2891 (52.7)            |
| Higher                                    | 2011 (36.7)            |
| <b>Physical Activity</b> (%)              |                        |
| Practically non                           | 584 (10.6)             |
| Now and then                              | 1615 (29.4)            |
| Regularly                                 | 2077 (37.8)            |
| Regularly strenuous                       | 1216 (22.2)            |

\*= categorization based on quartiles

**Table 2** Risk estimates for the muscle strength in youth as a determinant of self-reported musculoskeletal pain in adulthood

| Outcomes                    | Models                        |                                   |                          |                                              |                      |
|-----------------------------|-------------------------------|-----------------------------------|--------------------------|----------------------------------------------|----------------------|
|                             | Univariate<br>Muscle strength |                                   |                          | Multivariate <sup>a</sup><br>Muscle strength |                      |
|                             | Low (N=1371)<br>IRR (N)       | Average (N=2745)<br>Reference (N) | High (N=1371)<br>IRR (N) | Low<br>IRR (95% CI)                          | High<br>IRR (95% CI) |
| Musculoskeletal pain        | 0.92 (668)                    | 1 (1457)                          | 0.99 (722)               | 0.93 (0.87-0.99)                             | 0.99 (0.93-1.05)     |
| Severe musculoskeletal pain | 0.96 (135)                    | 1 (283)                           | 1.12 (158)               | 0.96 (0.79-1.17)                             | 1.08 (0.90-1.30)     |
| Pain in back/hips           | 0.92 (384)                    | 1 (832)                           | 1.03 (429)               | 0.93 (0.84-1.04)                             | 1.03 (0.94-1.14)     |
| Pain in neck/shoulders      | 0.91 (366)                    | 1 (799)                           | 0.99 (397)               | 0.92 (0.83-1.03)                             | 1.00 (0.90-1.10)     |
| Pain in arms/legs           | 0.97 (297)                    | 1 (616)                           | 1.07 (330)               | 0.97 (0.85-1.10)                             | 1.06 (0.94-1.19)     |

N= Number of cases

IRR= Incidence rate ratio

CI= Confidence interval

a= adjusted for smoking status, physical activity, education, body mass index

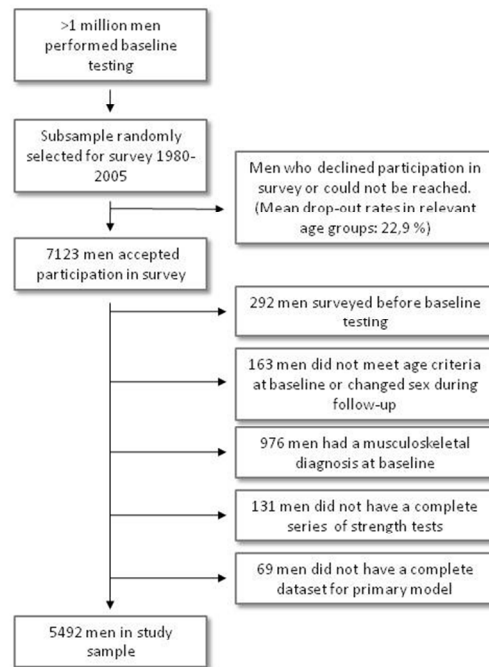

Figure 1: The identification of the study sample and the loss to follow-up  
254x190mm (96 x 96 DPI)

STROBE 2007 (v4) Statement—Checklist of items that should be included in reports of *cohort studies*

| Section/Topic                | Item # | Recommendation                                                                                                                                                                       | Reported on page # |
|------------------------------|--------|--------------------------------------------------------------------------------------------------------------------------------------------------------------------------------------|--------------------|
| Title and abstract           | 1      | (a) Indicate the study's design with a commonly used term in the title or the abstract                                                                                               | 1                  |
|                              |        | (b) Provide in the abstract an informative and balanced summary of what was done and what was found                                                                                  | 2-3                |
| <b>Introduction</b>          |        |                                                                                                                                                                                      |                    |
| Background/rationale         | 2      | Explain the scientific background and rationale for the investigation being reported                                                                                                 | 5-6                |
| Objectives                   | 3      | State specific objectives, including any prespecified hypotheses                                                                                                                     | 6                  |
| <b>Methods</b>               |        |                                                                                                                                                                                      |                    |
| Study design                 | 4      | Present key elements of study design early in the paper                                                                                                                              | 6+                 |
| Setting                      | 5      | Describe the setting, locations, and relevant dates, including periods of recruitment, exposure, follow-up, and data collection                                                      | 6-9                |
| Participants                 | 6      | (a) Give the eligibility criteria, and the sources and methods of selection of participants. Describe methods of follow-up                                                           | 6-7                |
|                              |        | (b) For matched studies, give matching criteria and number of exposed and unexposed                                                                                                  | -                  |
| Variables                    | 7      | Clearly define all outcomes, exposures, predictors, potential confounders, and effect modifiers. Give diagnostic criteria, if applicable                                             | 6-9                |
| Data sources/<br>measurement | 8*     | For each variable of interest, give sources of data and details of methods of assessment (measurement). Describe comparability of assessment methods if there is more than one group | 6-9                |
| Bias                         | 9      | Describe any efforts to address potential sources of bias                                                                                                                            | 9                  |
| Study size                   | 10     | Explain how the study size was arrived at                                                                                                                                            | Figure 1           |
| Quantitative variables       | 11     | Explain how quantitative variables were handled in the analyses. If applicable, describe which groupings were chosen and why                                                         | 6-9                |
| Statistical methods          | 12     | (a) Describe all statistical methods, including those used to control for confounding                                                                                                | 9                  |
|                              |        | (b) Describe any methods used to examine subgroups and interactions                                                                                                                  | 9                  |
|                              |        | (c) Explain how missing data were addressed                                                                                                                                          | -                  |
|                              |        | (d) If applicable, explain how loss to follow-up was addressed                                                                                                                       | -                  |
|                              |        | (e) Describe any sensitivity analyses                                                                                                                                                | 9                  |
| <b>Results</b>               |        |                                                                                                                                                                                      |                    |



|                          |     |                                                                                                                                                                                                              |          |
|--------------------------|-----|--------------------------------------------------------------------------------------------------------------------------------------------------------------------------------------------------------------|----------|
| Participants             | 13* | (a) Report numbers of individuals at each stage of study—eg numbers potentially eligible, examined for eligibility, confirmed eligible, included in the study, completing follow-up, and analysed            | Figure 1 |
|                          |     | (b) Give reasons for non-participation at each stage                                                                                                                                                         | Figure 1 |
|                          |     | (c) Consider use of a flow diagram                                                                                                                                                                           | Figure 1 |
| Descriptive data         | 14* | (a) Give characteristics of study participants (eg demographic, clinical, social) and information on exposures and potential confounders                                                                     | Table 1  |
|                          |     | (b) Indicate number of participants with missing data for each variable of interest                                                                                                                          | Table 1  |
|                          |     | (c) Summarise follow-up time (eg, average and total amount)                                                                                                                                                  | Table 1  |
| Outcome data             | 15* | Report numbers of outcome events or summary measures over time                                                                                                                                               | Table 1  |
| Main results             | 16  | (a) Give unadjusted estimates and, if applicable, confounder-adjusted estimates and their precision (eg, 95% confidence interval). Make clear which confounders were adjusted for and why they were included | Table 1  |
|                          |     | (b) Report category boundaries when continuous variables were categorized                                                                                                                                    | 6-9      |
|                          |     | (c) If relevant, consider translating estimates of relative risk into absolute risk for a meaningful time period                                                                                             | -        |
| Other analyses           | 17  | Report other analyses done—eg analyses of subgroups and interactions, and sensitivity analyses                                                                                                               | 9        |
| <b>Discussion</b>        |     |                                                                                                                                                                                                              |          |
| Key results              | 18  | Summarise key results with reference to study objectives                                                                                                                                                     | 10-11    |
| <b>Limitations</b>       |     |                                                                                                                                                                                                              |          |
| Interpretation           | 20  | Give a cautious overall interpretation of results considering objectives, limitations, multiplicity of analyses, results from similar studies, and other relevant evidence                                   | 13-14    |
| Generalisability         | 21  | Discuss the generalisability (external validity) of the study results                                                                                                                                        | 12-13    |
| <b>Other information</b> |     |                                                                                                                                                                                                              |          |
| Funding                  | 22  | Give the source of funding and the role of the funders for the present study and, if applicable, for the original study on which the present article is based                                                | 14       |

\*Give information separately for cases and controls in case-control studies and, if applicable, for exposed and unexposed groups in cohort and cross-sectional studies.

**Note:** An Explanation and Elaboration article discusses each checklist item and gives methodological background and published examples of transparent reporting. The STROBE checklist is best used in conjunction with this article (freely available on the Web sites of PLoS Medicine at <http://www.plosmedicine.org/>, Annals of Internal Medicine at <http://www.annals.org/>, and Epidemiology at <http://www.epidem.com/>). Information on the STROBE Initiative is available at [www.strobe-statement.org](http://www.strobe-statement.org).



**Muscle Strength in Adolescent Men and Future  
Musculoskeletal Pain:  
A Cohort Study with 17 Years of Follow-up**

|                                    |                                                                                                                                                                                                                                                                                                                                                     |
|------------------------------------|-----------------------------------------------------------------------------------------------------------------------------------------------------------------------------------------------------------------------------------------------------------------------------------------------------------------------------------------------------|
| Journal:                           | <i>BMJ Open</i>                                                                                                                                                                                                                                                                                                                                     |
| Manuscript ID:                     | bmjopen-2013-002656.R1                                                                                                                                                                                                                                                                                                                              |
| Article Type:                      | Research                                                                                                                                                                                                                                                                                                                                            |
| Date Submitted by the Author:      | 01-Mar-2013                                                                                                                                                                                                                                                                                                                                         |
| Complete List of Authors:          | Timpka, Simon; Lund University, Department of Orthopedics<br>Pettersson, Ingemar; Lund University, Department of Orthopedics<br>Zhou, Caddie; Lund University, Department of Orthopedics<br>Englund, Martin; Lund University, Department of Orthopedics; Boston<br>University School of Medicine, Clinical Epidemiology Research & Training<br>Unit |
| <b>Primary Subject<br>Heading</b>: | Epidemiology                                                                                                                                                                                                                                                                                                                                        |
| Secondary Subject Heading:         | Sports and exercise medicine, Rheumatology, Public health                                                                                                                                                                                                                                                                                           |
| Keywords:                          | Musculoskeletal disorders < ORTHOPAEDIC & TRAUMA SURGERY, SPORTS<br>MEDICINE, PREVENTIVE MEDICINE                                                                                                                                                                                                                                                   |
|                                    |                                                                                                                                                                                                                                                                                                                                                     |

SCHOLARONE™  
Manuscripts

1  
2  
3  
4  
5  
6  
7  
8  
9  
10  
11  
12  
13  
14  
15  
16

# Muscle Strength in Adolescent Men and Future Musculoskeletal Pain:

## A Cohort Study with 17 Years of Follow-up

17  
18  
19  
20  
21  
22  
23  
24  
25  
26  
27  
28  
29  
30  
31  
32  
33  
34  
35  
36  
37  
38  
39  
40  
41  
42  
43  
44  
45  
46  
47  
48  
49  
50  
51  
52  
53  
54  
55  
56  
57  
58  
59  
60

Simon Timpka<sup>1</sup>, Ingemar F Petersson<sup>1</sup>, Caddie Zhou<sup>1</sup>, Martin Englund<sup>1, 2</sup>

1 Department of Orthopedics, Clinical Sciences Lund, Lund University, Lund, Sweden

2 Clinical Epidemiology Research & Training Unit, Boston University School of Medicine, Boston, Massachusetts, United States of America

Corresponding author:

Simon Timpka  
Skånes universitetssjukhus  
Epi-centrum Skåne  
Medicon Village  
223 81 Lund  
Sweden

Phone: +46 738 395 276

Mail: [simon.timpka@med.lu.se](mailto:simon.timpka@med.lu.se)

Words in main text: 2800

Number of figures: 1

Number of tables: 2

## Abstract

### Objectives

Musculoskeletal pain is highly prevalent throughout adulthood with a major impact on health, function and participation in the society. Still, the association between muscle strength and development of musculoskeletal pain is unclear. We aimed to study whether overall muscle strength in adolescent men is associated with self-reported musculoskeletal pain in adulthood.

### Design

Cohort study with baseline data from the Swedish Conscription Register and outcome information from the random population-based Swedish Living Conditions Surveys.

### Setting

Sweden, 1970-2005.

### Participants

We studied 5489 men who at age 17-19 years tested their isometric muscle strength (hand grip, arm flexion, knee extension) during the compulsory conscription.

### Outcome measures

The men were surveyed regarding self-reported musculoskeletal pain; mean follow-up time of 17 (range 1-35) years. Our primary outcome was a self-report of musculoskeletal pain, and secondary outcomes were a report of "severe pain", "pain in back/hips", "pain in neck/shoulders", or "pain in arms/legs", respectively. We categorized muscle strength into three groups; low, average, and high using the 25th to 75th percentile to define the reference category (average). We estimated relative risks using log binomial regression with adjustment for smoking, body mass index, education, and physical activity.

**Results**

In the adjusted model, men with low overall muscle strength had decreased risk of self-reported musculoskeletal pain (0.93, 95% confidence interval 0.87-0.99). We observed no such association in men with high strength (0.99, 0.93-1.05). Furthermore, no statistically significant increase or decrease in risk was observed for any of the secondary outcomes.

**Conclusion**

In men, low overall isometric muscle strength in youth was not associated with an increased risk of future musculoskeletal pain. Contrarily, we observed a slightly decreased risk of self-reported musculoskeletal pain in adulthood. Residual confounding by adult occupational exposures, leisure time physical activity level and psychosocial factors may have impacted on results.

## Article summary

### Article focus

- We aimed to study whether overall muscle strength in youth is inversely associated with the development of musculoskeletal pain in adulthood.

### Key messages

- In contradiction to our expectations, we observed a decreased risk of self-reported musculoskeletal pain in adult men with low overall isometric muscle strength in youth.
- We speculate that low muscle strength may serve as a deselection criterion for activities with high risk of acute injuries or chronic physical overload, factors with negative impact on musculoskeletal health.

### Strengths and limitations of study

- The main strengths of the study are a large sample, the use of three different measures of muscle strength, and comparably long time to follow-up.
- The main limitations of the study are the following; the cohort does not include women, musculoskeletal pain only identified with one question per site, motivation for military service might influence measurement of muscle strength, and the potential for unmeasured or residual confounding.

## Introduction

Musculoskeletal disorders (MSDs), such as low back pain, osteoarthritis, and widespread pain, are highly prevalent in the adult population.<sup>1-3</sup> MSDs also contribute to a substantial burden of disease at middle and older ages.<sup>4</sup> Although pain emanating from the musculoskeletal system might be attributed to a wide range of diseases with diverse causal chains, many MSDs have common risk factors such as heavy occupational work load,<sup>5,6</sup> a high body mass index (BMI),<sup>7-9</sup> and a low socio-economy.<sup>10-12</sup> Although smoking in some studies have been identified as a risk factor for certain MSDs,<sup>13,14</sup> its main effect on musculoskeletal pain might be as an effect modifier of the pain sensation.<sup>15</sup> As physical work load is a risk factor for many MSDs,<sup>16</sup> a model in which the muscle strength in the loaded parts of the body are protective for future disorders is appealing. Furthermore, physical exercise with focus on muscle strength is an important secondary and tertiary prevention of MSDs.<sup>17,18</sup> A handful of studies have hitherto longitudinally investigated the strength of isolated muscle groups in adulthood as a determinant of later MSDs.<sup>19-22</sup> However, in adult subjects, there is for the time being conflicting evidence of the value of muscle strength as a protective factor of musculoskeletal pain, such as neck/shoulder pain and low back pain.<sup>19</sup>

In the longer perspective, relatively little is known about the association of muscle strength in youth and later disease, including musculoskeletal pain.<sup>23</sup> Two studies have investigated the result of single muscle strength tests as determinants of musculoskeletal complaints decades later.<sup>24,25</sup> The first, using number of sit-ups during 30 seconds as a strength measure, found no association with later low back pain or tension neck in men. In women, the high strength group had a decreased odds ratio (OR) of tension neck.<sup>24</sup> The second study found a decreased OR for MSDs in men who either had a strong performance in isotonic bench press or in a isometric two hand lift test.<sup>25</sup> Neither of the two studies includes a measure of overall muscular capacity. In summary, although there is some evidence of an association between low muscle strength in youth and later risk of MSDs, the association between overall muscle strength in adolescence and later musculoskeletal pain has not

1  
2  
3 been studied. Furthermore, with a larger sample size, data on common risk factors, testing of three  
4  
5 different muscle groups, and data on physical work capacity, we address some of the limitations of  
6  
7 earlier studies.  
8  
9

10 Our aim in this study was to investigate the general muscle strength in adolescent males as a  
11  
12 determinant of later self-reported musculoskeletal pain. We hypothesized that low general muscle  
13  
14 strength in youth is associated with an increased risk of having musculoskeletal pain in adulthood.  
15  
16

## 17 **Methods**

20 For this prospective register-based cohort study, we used two main criteria to identify the study  
21  
22 sample. First, when typically aged 18, the subjects should have performed mandatory conscription  
23  
24 testing in Sweden between 1970-1994, with the exception of the years 1978 and 1985. Secondly,  
25  
26 they should have been included in the Swedish Living Conditions Surveys any year between 1980 and  
27  
28 2005 when questions regarding musculoskeletal problems, smoking status, and physical activity were  
29  
30 simultaneously included.  
31  
32

33  
34 Furthermore, we excluded all men who were surveyed prior to the baseline testing or were younger  
35  
36 than 17 years or older than 19 years at baseline (Table 1). We also excluded men with an existing  
37  
38 musculoskeletal disorder (Diseases of the musculoskeletal system and connective tissue according to  
39  
40 the International classification of disease version 8 or 9) and those who had missing data on variables  
41  
42 included in the primary model (muscle strength, smoking, BMI, physical activity, level of education).  
43  
44 In the final study sample we included 5489 men (figure 1). Data from the Swedish conscription  
45  
46 testing has been previously used for research purposes.<sup>26-28</sup> During the period of the study sample  
47  
48 testing, conscription was mandatory by law for all Swedish men. Specially trained employees at six  
49  
50 regional conscription offices administrated the conscription tests during a two-day session that also  
51  
52 included separate evaluations by a medical doctor and a psychologist. Only men with serious health  
53  
54 complaints, were excused from conscription. The procedure included measurements of each  
55  
56  
57  
58  
59  
60



1  
2  
3 subject's weight in underwear to the kilogram and height without shoes to the centimeter. Using  
4  
5 height and weight, we calculated BMI as height/kg<sup>2</sup>. Probably due to rare errors of data entry, there  
6  
7 are unlikely extreme values in the dataset. Therefore, we excluded all subjects with registered  
8  
9 extreme values on height (<150, >210 cm), weight (<40, >150 kg), or an extreme calculated value for  
10  
11 BMI (<15, >60) (figure 1). The study was approved by the Ethical Review Board at Lund University  
12  
13 and the manuscript was prepared according to the STROBE-statement.<sup>29</sup>

### 14 15 *Muscle strength*

16  
17 The men performed three tests of isometric muscle strength during conscription; hand grip, elbow  
18  
19 flexion, and knee extension. At the start of test period in 1970, the tests were performed as  
20  
21 previously described<sup>30</sup> and remained unchanged in general throughout the test period. In summary,  
22  
23 hand grip strength on the preferred side was measured with 90° flexion at the elbow and the  
24  
25 humerus in parallel to the torso. Knee extension was measured in a sitting position with 90° knee  
26  
27 flexion and arms crossed over chest. The pelvis was fixed to the seat and a strap fastened above the  
28  
29 lateral malleolus. Also, elbow flexion was measured in a sitting position with 90° flexion at the elbow  
30  
31 and the humerus in parallel to the torso. A strap was fastened at the level of the radial styloid  
32  
33 process.  
34  
35

36  
37 We calculated a measure of general muscle strength by standardizing and combining the three tests  
38  
39 of muscle strength. To avoid bias due to change of testing procedure over time, we categorized the  
40  
41 cohort into five subgroups based on period of conscription (1970-1973, 1974-1977, 1979-1984, 1986-  
42  
43 1990, 1990-1994) and for each subgroup calculated the relative muscle strength. We standardized  
44  
45 the three tests of muscle strength [standardized value= (value–mean)/standard deviation] within  
46  
47 each subgroup and used the mean of the three test scores as a proxy for general muscle strength.  
48  
49 Using percentiles, we then categorized the cohort into three groups of muscle strength, where the  
50  
51 25<sup>th</sup> to 75<sup>th</sup> percentile defined the average category, the bottom 25<sup>th</sup> percentile configured the low  
52  
53 category, and the top 25<sup>th</sup> percentile defined the high muscle strength category.  
54  
55  
56  
57  
58  
59  
60

### Survey of musculoskeletal pain

The Swedish Living Conditions Surveys (ULF) is a random population based survey conducted by Statistics Sweden, previously used for research purposes.<sup>31-33</sup> For the present study, we used data collected during a total of 10 years (1980, 1988, 1989, 1997-1999, 2002-2005). The surveys were generally performed as interviews in person by trained interviewers, with a minority of the interviews performed by phone. For men included in more than one survey, we used the last survey without relevant study data missing.

At follow-up, the men were asked three questions regarding any current musculoskeletal pain: 1) Do you have pain in neck or shoulders? 2) Do you have back-pain, hip-pain or sciatica? 3) Do you have ache, pain in hands, elbows, legs or knees? For each type of complaint one of three answers was possible: 1) Yes, severe 2) Yes, mild and 3) No. Our primary outcome was having reported either severe or mild musculoskeletal pain, whereas our secondary outcomes we defined as follows: 1) Having reported severe musculoskeletal pain 2) Having reported pain in back/hips 3) Having reported pain in shoulders/neck 4) Having reported pain in arms/legs. From the surveys, we also included data on self-reported current smoking status (yes/no), physical activity (practically none, now and then, regularly, regularly strenuous), and level of education (compulsory school or less, secondary education, higher education). Drop-outs from the survey, i.e. those who have declined participation, cannot be individually identified. However, during the years of survey used in this study, the participation rate in the survey among men in relevant age groups were 70.0-88.7%.

### Statistical analyses

All analyses were performed with SAS 9.3 (SAS Institute Inc). We used logistic binomial regression to estimate relative risks (RR) and control potential confounders. In the multivariate model (primary model), we included muscle strength, BMI, smoking status, physical activity and level of education.

### *Sensitivity analyses*

To test whether cardiovascular aspects of physical capacity confounded our results, we used physical work capacity measured as  $W_{\max 6 \text{ min}}$  in a sensitivity analysis. For  $W_{\max 6 \text{ min}}$ , the test result is an estimate of maximum work sustainable for 6 minutes<sup>34</sup> and is in young men correlated with maximum oxygen uptake ( $r=0.9$ ).<sup>35 36</sup> Acceptable data quality on work capacity was available in the subsample of men performing the baseline testing in 1976-1982. Out of all men in the cohort conscripted during the time period, 1154 men (74.6 %) completed an acceptable physical work capacity test on a bicycle ergometer (i.e. heart rate  $>174$  at the end of testing). We added the work capacity in relation to body weight as a continuous variable to the univariate model. Furthermore, we also performed two sensitivity analyses on the multivariate model with musculoskeletal pain as the dependent variable. In the first, we added test center to the model. For the second, to test whether our categorization of muscle strength influenced the results, we 1) treated the standardized muscle strength as a continuous variable 2) treated the standardized muscle strength as a categorical variable based on quintiles.

## Results

The mean time to follow-up was 17 years (table 1). Men with low muscle strength did not have an increased risk, but rather a statistically significant decreased risk, for the primary outcome "Musculoskeletal pain" (table 2). To summarize the observations of the secondary outcomes, we did not observe any statistically significant risk increases for neither men with a low nor high muscle strength. Compared to the crude model, the multivariate model produced similar risk estimates.

### *Sensitivity analyses*

Work capacity had a significant effect in the subsample analysis ( $p=0.03$ ) whereas it had only minor effect on the risk estimates for musculoskeletal pain, being 0.94 (95% confidence interval 0.82-1.08) and 1.02 (0.90-1.16) for low and high strength, respectively. The pattern of association in the secondary outcomes were in general somewhat strengthened when we adjusted for work capacity (data not shown). Using muscle strength as a continuous variable (hence assuming a linear relationship) did weaken the association with later musculoskeletal pain ( $p=0.23$ ). When we instead used quintiles to categorize muscle strength, we observed no increased risk for the group with lowest strength compared to average strength (RR=0.93, 0.85-1.01).

## Discussion

Investigating the overall isometric muscle strength in adolescent men as a determinant of future musculoskeletal pain, we observed a decreased risk of self-reported musculoskeletal pain in men with low muscle strength. No such association was observed for men with high strength. We also found a similar, however not statistically significant, pattern for "pain in back/hips" and "pain in neck/shoulders", whereas no association was found for future problems in arms/legs. Noticeably the observed associations were in contradiction to our expectations.

1  
2  
3 Using a historical cohort design with prospective registration of exposure and the outcome, our study  
4  
5 includes a large sample and thus allows better control for known confounders compared to previous  
6  
7 studies. All covariates (muscle strength, BMI, smoking, education, physical activity) included in the  
8  
9 multivariate model for musculoskeletal pain also had a significant association with the outcome.

10  
11 Furthermore, by controlling for work capacity, we aimed to isolate the direct effect of muscle  
12  
13 strength from other aspects of physical capacity. However, the study also has important limitations.  
14  
15 First and foremost, we have used strength data from military conscription testing. Although it  
16  
17 provides a rich dataset from a structured environment, we do not know how the subject's motivation  
18  
19 for military service may have biased the performance during the testing procedure. However,  
20  
21 assuming there is no association between motivation at conscription testing and later risk of  
22  
23 musculoskeletal pain (or the loss to follow-up) any bias would at most dilute our result. Nevertheless,  
24  
25 stronger recruits are more likely to be assigned to positions with heavy load duty. Secondly, the  
26  
27 conscription was mandatory for men only. As the pattern of physical activity and occupational  
28  
29 exposure differ between men and women, any generalization of the results to women must be made  
30  
31 with great caution. Third, the physical activity measurement consisted of a single question and did  
32  
33 neither allow calculation of metabolic equivalent of task (MET) nor included occupational exposure.  
34  
35 Also musculoskeletal pain is measured by questions that combine more than one site, decreasing the  
36  
37 precision. However, the categories are fairly well demarcated anatomically save for the question  
38  
39 regarding pain in arms/legs. Fourth, the covariates collected with musculoskeletal pain at follow-up  
40  
41 (smoking, physical activity, level of education) are cross-sectional and might thus be mediators of  
42  
43 reverse causation. However, the adjusted estimates are much in line with the crude estimates.  
44  
45  
46  
47  
48

49 It has previously been suggested that there is a U-shaped association between physical activity and  
50  
51 later back pain.<sup>37 38</sup> Furthermore, as former occupational exposure and certain sport participation  
52  
53 are established risk factors for future MSDs,<sup>16 39</sup> it lends some evidence for a more general model, in  
54  
55 which certain forms of physical activity is negative for the musculoskeletal health. Primarily, our  
56  
57 observations do not support low muscle strength in youth as a risk factor for later musculoskeletal  
58  
59  
60

1  
2  
3 pain. Instead, we speculate that our results can be explained by muscle strength in youth being one  
4  
5 selection criterion for future high risk activities with a negative influence on the musculoskeletal  
6  
7 health, e.g. higher risk of joint injury due to sports participation or manual repetitive work load. This  
8  
9 would also include more immediate exposure such as more physically demanding military service.<sup>40</sup>  
10  
11 Although we have controlled for level of education, which might serve as a proxy for occupational  
12  
13 exposure, there is potential for residual confounding as we did not have more appropriate data. In  
14  
15 other words, individuals with low general muscle strength might to a certain degree be deselected  
16  
17 for high risk activities compared to men with an average or high strength. However, this is only one  
18  
19 of many possible explanations. For example, the strength of an individual is associated with the  
20  
21 muscle fiber type distribution, which have a large genetic component.<sup>41</sup> Type I fibers are more  
22  
23 common in endurance athletes<sup>42</sup> whereas high type II percentage have been reported to be  
24  
25 associated with isometric muscle strength<sup>43</sup> as well as low back pain.<sup>44</sup> Thus, our observations could  
26  
27 potentially be explained by both social and biological factors.  
28  
29

30  
31 Partly in contrast with a previous study,<sup>25</sup> we did not observe a negative effect of low muscle  
32  
33 strength on the risk future of musculoskeletal problems in men. Although we in the present study  
34  
35 only include measurements of isometric strength, the previous study observed associations with  
36  
37 both an isometric strength measure (static two hand lift) and an isotonic strength measure (bench  
38  
39 press). In a study on the same cohort, it is reported that the result in bench press, but not two hand  
40  
41 lift, was associated with both future cardiovascular fitness and future physical activity,<sup>45</sup> potentially  
42  
43 explaining part of the difference. Another study reported flexibility as a sit and reach test,<sup>24</sup> but not  
44  
45 strength measured as sit-ups, to be negatively associated with future risk of back pain. Hence, it is  
46  
47 possible that other aspects of muscular and musculoskeletal function is of greater importance of  
48  
49 future risk of MSDs than isometric muscle strength.  
50  
51

52  
53  
54 The association between muscle strength and later musculoskeletal pain diminished when we used  
55  
56 muscle strength as a continuous variable. This was not surprising, as the observed association was  
57  
58  
59  
60

1  
2  
3 non linear in the primary model. It is to be expected that the test offices differ somewhat in their  
4 reported test results, as they were assigned adolescents based on geography. However, including  
5 test offices in the model did not have any effect on the overall association. When we included work  
6 capacity in the model, most risk estimates decreased in absolute values, furthering strengthening the  
7 observations in the primary model. By using the relative muscle strength during testing periods of  
8 five years, we partially address the potential systematic change in testing procedure over the years.  
9 Although the methods of measurements have not changed at large, minor adjustments cannot be  
10 excluded.  
11  
12  
13  
14  
15  
16  
17  
18  
19

20  
21 Although we found no increased risk of future musculoskeletal problems in men with low muscle  
22 strength in adolescence, future studies need to better quantify the occupational exposure and leisure  
23 time physical activity. Since the physical activity pattern and physical fitness profiles differ between  
24 men and women, further investigations are also needed to investigate if similar associations can be  
25 found in women.  
26  
27  
28  
29  
30  
31

32  
33 In contrast to our hypothesis, we observed a decreased risk of self-reported musculoskeletal pain in  
34 adult men with low overall isometric muscle strength in youth. We speculate that low muscle  
35 strength *per se* is not protective of future musculoskeletal pain. Instead, low muscle strength might  
36 serve as a deselection criterion for professions or types of leisure time physical activity with higher  
37 risk of acute injuries or chronic physical overload, factors with negative impact on musculoskeletal  
38 health.  
39  
40  
41  
42  
43  
44  
45

## 46 **Acknowledgements**

47  
48  
49 No author has a conflict of interest to report. The authors would like to thank Charlotte Bergknot for  
50 the initial data management.  
51  
52  
53  
54

## 55 **Funding**

1  
2  
3 The authors are supported by grants from The Swedish Research Council, Skåne Regional Council,  
4 and the Faculty of Medicine at Lund University. The funders neither influenced the study process nor  
5 manuscript preparation.  
6  
7  
8

## 9 10 **Author contributions**

11  
12  
13  
14 ST proposed the study idea, collected data, designed the study, and drafted the manuscript. IP  
15 designed the study and provided input during manuscript preparation. CZ designed the study and  
16 performed the statistical analyses. ME designed the study, collected data, and provided input during  
17 manuscript preparation. All authors approved the final version of the manuscript.  
18  
19  
20  
21

## 22 **Data sharing statement**

23  
24  
25  
26  
27 There is no additional data to share.  
28  
29

## 30 **References**

- 31  
32  
33  
34 1. Bergman S, Herrstrom P, Hogstrom K, Petersson IF, Svensson B, Jacobsson LT. Chronic  
35 musculoskeletal pain, prevalence rates, and sociodemographic associations in a Swedish  
36 population study. *J Rheumatol* 2001;28(6):1369-77.  
37  
38  
39 2. Picavet HS, Schouten JS. Musculoskeletal pain in the Netherlands: prevalences, consequences and  
40 risk groups, the DMC(3)-study. *Pain* 2003;102(1-2):167-78.  
41  
42  
43 3. Urwin M, Symmons D, Allison T, Brammah T, Busby H, Roxby M, et al. Estimating the burden of  
44 musculoskeletal disorders in the community: the comparative prevalence of symptoms at  
45 different anatomical sites, and the relation to social deprivation. *Ann Rheum Dis*  
46 1998;57(11):649-55.  
47  
48  
49 4. Murray CJ, Vos T, Lozano R, Naghavi M, Flaxman AD, Michaud C, et al. Disability-adjusted life years  
50 (DALYs) for 291 diseases and injuries in 21 regions, 1990-2010: a systematic analysis for the  
51 Global Burden of Disease Study 2010. *Lancet* 2013;380(9859):2197-223.  
52  
53  
54  
55  
56  
57  
58  
59  
60



- 1  
2  
3 5. van der Windt DA, Thomas E, Pope DP, de Winter AF, Macfarlane GJ, Bouter LM, et al.  
4  
5 Occupational risk factors for shoulder pain: a systematic review. *Occup Environ Med*  
6  
7 2000;57(7):433-42.  
8
- 9  
10 6. Hoogendoorn WE, van Poppel MN, Bongers PM, Koes BW, Bouter LM. Physical load during work  
11  
12 and leisure time as risk factors for back pain. *Scand J Work Environ Health* 1999;25(5):387-  
13  
14 403.
- 15  
16 7. Felson DT, Zhang Y, Hannan MT, Naimark A, Weissman B, Aliabadi P, et al. Risk factors for incident  
17  
18 radiographic knee osteoarthritis in the elderly: the Framingham Study. *Arthritis Rheum*  
19  
20 1997;40(4):728-33.  
21
- 22  
23 8. Shiri R, Karppinen J, Leino-Arjas P, Solovieva S, Viikari-Juntura E. The association between obesity  
24  
25 and low back pain: a meta-analysis. *Am J Epidemiol* 2010;171(2):135-54.  
26
- 27  
28 9. Grotle M, Hagen KB, Natvig B, Dahl FA, Kvien TK. Obesity and osteoarthritis in knee, hip and/or  
29  
30 hand: an epidemiological study in the general population with 10 years follow-up. *BMC*  
31  
32 *Musculoskelet Disord* 2008;9:132.
- 33  
34 10. Hagen K, Zwart JA, Svebak S, Bovim G, Jacob Stovner L. Low socioeconomic status is associated  
35  
36 with chronic musculoskeletal complaints among 46,901 adults in Norway. *Scand J Public*  
37  
38 *Health* 2005;33(4):268-75.  
39
- 40  
41 11. Dalstra JA, Kunst AE, Borrell C, Breeze E, Cambois E, Costa G, et al. Socioeconomic differences in  
42  
43 the prevalence of common chronic diseases: an overview of eight European countries. *Int J*  
44  
45 *Epidemiol* 2005;34(2):316-26.
- 46  
47 12. Bengtsson C, Nordmark B, Klareskog L, Lundberg I, Alfredsson L. Socioeconomic status and the  
48  
49 risk of developing rheumatoid arthritis: results from the Swedish EIRA study. *Ann Rheum Dis*  
50  
51 2005;64(11):1588-94.
- 52  
53 13. Palmer KT, Syddall H, Cooper C, Coggon D. Smoking and musculoskeletal disorders: findings from  
54  
55 a British national survey. *Ann Rheum Dis* 2003;62(1):33-6.  
56  
57  
58  
59  
60

- 1  
2  
3 14. Holth HS, Werpen HK, Zwart JA, Hagen K. Physical inactivity is associated with chronic  
4  
5 musculoskeletal complaints 11 years later: results from the Nord-Trondelag Health Study.  
6  
7 *BMC Musculoskelet Disord* 2008;9:159.  
8
- 9 15. McBeth J, Jones K. Epidemiology of chronic musculoskeletal pain. *Best Pract Res Clin Rheumatol*  
10  
11 2007;21(3):403-25.  
12
- 13 16. Roquelaure Y, Ha C, Rouillon C, Fouquet N, Leclerc A, Descatha A, et al. Risk factors for upper-  
14  
15 extremity musculoskeletal disorders in the working population. *Arthritis Rheum*  
16  
17 2009;61(10):1425-34.  
18
- 19 17. Hakkinen A, Sokka T, Kotaniemi A, Hannonen P. A randomized two-year study of the effects of  
20  
21 dynamic strength training on muscle strength, disease activity, functional capacity, and bone  
22  
23 mineral density in early rheumatoid arthritis. *Arthritis Rheum* 2001;44(3):515-22.  
24  
25
- 26 18. Baker KR, Nelson ME, Felson DT, Layne JE, Sarno R, Roubenoff R. The efficacy of home based  
27  
28 progressive strength training in older adults with knee osteoarthritis: a randomized  
29  
30 controlled trial. *J Rheumatol* 2001;28(7):1655-65.  
31  
32
- 33 19. Hamberg-van Reenen HH, Ariens GA, Blatter BM, van Mechelen W, Bongers PM. A systematic  
34  
35 review of the relation between physical capacity and future low back and neck/shoulder  
36  
37 pain. *Pain* 2007;130(1-2):93-107.  
38
- 39 20. Leino P, Aro S, Hasan J. Trunk muscle function and low back disorders: a ten-year follow-up study.  
40  
41 *J Chronic Dis* 1987;40(4):289-96.  
42  
43
- 44 21. Kujala UM, Taimela S, Viljanen T, Jutila H, Viitasalo JT, Videman T, et al. Physical loading and  
45  
46 performance as predictors of back pain in healthy adults. A 5-year prospective study. *Eur J*  
47  
48 *Appl Physiol Occup Physiol* 1996;73(5):452-8.  
49
- 50 22. Faber A, Sell L, Hansen JV, Burr H, Lund T, Holtermann A, et al. Does muscle strength predict  
51  
52 future musculoskeletal disorders and sickness absence? *Occupational medicine (Oxford,*  
53  
54 *England)* 2012;62(1):41-6.  
55  
56  
57  
58  
59  
60

- 1  
2  
3 23. Ruiz JR, Castro-Pinero J, Artero EG, Ortega FB, Sjostrom M, Suni J, et al. Predictive validity of  
4  
5 health-related fitness in youth: a systematic review. *Br J Sports Med* 2009;43(12):909-23.  
6  
7 24. Mikkelsen LO, Nupponen H, Kaprio J, Kautiainen H, Mikkelsen M, Kujala UM. Adolescent  
8  
9 flexibility, endurance strength, and physical activity as predictors of adult tension neck, low  
10  
11 back pain, and knee injury: a 25 year follow up study. *Br J Sports Med* 2006;40(2):107-13.  
12  
13 25. Barnekow-Bergkvist M, Hedberg GE, Janlert U, Jansson E. Determinants of self-reported neck-  
14  
15 shoulder and low back symptoms in a general population. *Spine (Phila Pa 1976)*  
16  
17 1998;23(2):235-43.  
18  
19 26. Neovius M, Sundstrom J, Rasmussen F. Combined effects of overweight and smoking in late  
20  
21 adolescence on subsequent mortality: nationwide cohort study. *BMJ* 2009;338:b496.  
22  
23 27. Nilsson PM, Nyberg P, Ostergren PO. Increased susceptibility to stress at a psychological  
24  
25 assessment of stress tolerance is associated with impaired fetal growth. *Int J Epidemiol*  
26  
27 2001;30(1):75-80.  
28  
29 28. Hemmingsson T, Melin B, Allebeck P, Lundberg I. The association between cognitive ability  
30  
31 measured at ages 18-20 and mortality during 30 years of follow-up--a prospective  
32  
33 observational study among Swedish males born 1949-51. *Int J Epidemiol* 2006;35(3):665-70.  
34  
35 29. von Elm E, Altman DG, Egger M, Pocock SJ, Gotsche PC, Vandenbroucke JP. Strengthening the  
36  
37 Reporting of Observational Studies in Epidemiology (STROBE) statement: guidelines for  
38  
39 reporting observational studies. *BMJ* 2007;335(7624):806-8.  
40  
41 30. Nordesjo LO, Schéle R. Validity of Ergometer Cycle Test and Measures of Isometric Muscle  
42  
43 Strength when Predicting some Aspects of Military Performance. *Swedish J Defence Med*  
44  
45 1974(10):11-23.  
46  
47 31. Wolk A, Rossner S. Effects of smoking and physical activity on body weight: developments in  
48  
49 Sweden between 1980 and 1989. *J Intern Med* 1995;237(3):287-91.  
50  
51 32. Sundquist J, Johansson SE. The influence of socioeconomic status, ethnicity and lifestyle on body  
52  
53 mass index in a longitudinal study. *Int J Epidemiol* 1998;27(1):57-63.  
54  
55  
56  
57  
58  
59  
60

- 1  
2  
3 33. Bygren LO, Konlaan BB, Johansson SE. Attendance at cultural events, reading books or  
4  
5 periodicals, and making music or singing in a choir as determinants for survival: Swedish  
6  
7 interview survey of living conditions. *BMJ* 1996;313(7072):1577-80.  
8  
9  
10 34. Tornvall G. Assessment of physical capabilities. *Acta physiologica Scandinavica* 1963;58(Suppl  
11  
12 201):1-102.  
13  
14 35. Nordesjo LO. A comparison between the Thornvall maximal ergometer test, submaximal  
15  
16 ergometer tests and maximal oxygen uptake. *Swedish J Defence Med* 1974(10):3-10.  
17  
18 36. Nordesjo LO. Estimation of the maximal work rate sustainable for 6 minutes using a single-level  
19  
20 load or stepwise increasing loads. *Ups J Med Sci* 1974;79(1):45-50.  
21  
22 37. Heneweer H, Vanhees L, Picavet HS. Physical activity and low back pain: a U-shaped relation?  
23  
24 *Pain* 2009;143(1-2):21-5.  
25  
26 38. Heneweer H, Picavet HS, Staes F, Kiers H, Vanhees L. Physical fitness, rather than self-reported  
27  
28 physical activities, is more strongly associated with low back pain: evidence from a working  
29  
30 population. *Eur Spine J* 2012;21(7):1265-72.  
31  
32 39. Kujala UM, Kettunen J, Paananen H, Aalto T, Battie MC, Impivaara O, et al. Knee osteoarthritis in  
33  
34 former runners, soccer players, weight lifters, and shooters. *Arthritis Rheum* 1995;38(4):539-  
35  
36 46.  
37  
38 40. Almeida SA, Williams KM, Shaffer RA, Brodine SK. Epidemiological patterns of musculoskeletal  
39  
40 injuries and physical training. *Med Sci Sports Exerc* 1999;31(8):1176-82.  
41  
42 41. Simoneau JA, Bouchard C. Genetic determinism of fiber type proportion in human skeletal  
43  
44 muscle. *FASEB J* 1995;9(11):1091-5.  
45  
46 42. Costill DL, Daniels J, Evans W, Fink W, Krahenbuhl G, Saltin B. Skeletal muscle enzymes and fiber  
47  
48 composition in male and female track athletes. *J Appl Physiol* 1976;40(2):149-54.  
49  
50 43. Tesch P, Karlsson J. Isometric strength performance and muscle fibre type distribution in man.  
51  
52  
53 *Acta physiologica Scandinavica* 1978;103(1):47-51.  
54  
55  
56  
57  
58  
59  
60

- 1  
2  
3 44. Mannion AF, Weber BR, Dvorak J, Grob D, Muntener M. Fibre type characteristics of the lumbar  
4  
5 paraspinal muscles in normal healthy subjects and in patients with low back pain. *J Orthop*  
6  
7 *Res* 1997;15(6):881-7.  
8  
9  
10 45. Barnekow-Bergkvist M, Hedberg G, Janlert U, Jansson E. Prediction of physical fitness and  
11  
12 physical activity level in adulthood by physical performance and physical activity in  
13  
14 adolescence--an 18-year follow-up study. *Scand J Med Sci Sports* 1998;8(5 Pt 1):299-308.  
15  
16  
17  
18  
19

## 20 Tables and Figures

21  
22 **Table 1:** Description of study sample

23  
24 **Table 2:** Risk estimates for the muscle strength in youth as a determinant of self-reported  
25  
26 musculoskeletal pain in adulthood  
27

28  
29 **Figure 1:** The identification of the study sample and the loss to follow-up  
30  
31  
32  
33  
34  
35  
36  
37  
38  
39  
40  
41  
42  
43  
44  
45  
46  
47  
48  
49  
50  
51  
52  
53  
54  
55  
56  
57  
58  
59  
60

Table 1 Description of study sample

|                                           |                        |
|-------------------------------------------|------------------------|
| <b>Number of men</b>                      | 5489                   |
| <b>Mean age at baseline (SD)</b>          | 18.2 (0.5)             |
| <b>Mean time to follow-up (SD, range)</b> | 17.2 years (8.4, 1-35) |
| <b>Mean hand grip* (SD)</b>               | 617 (98)               |
| <b>Mean elbow flexion* (SD)</b>           | 385 (83)               |
| <b>Mean knee extension* (SD)</b>          | 567 (116)              |
| <b>Muscle Strength (%)</b>                |                        |
| Low                                       | 1371 (25.0)            |
| Average                                   | 2747 (50.0)            |
| High                                      | 1371 (25.0)            |
| <b>BMI (%)</b>                            |                        |
| <18.5                                     | 477 (8.7)              |
| 18.5-24.9                                 | 4498 (81.9)            |
| 25-29.9                                   | 448 (8.2)              |
| >30                                       | 66 (1.2)               |
| <b>Type of interview (%)</b>              |                        |
| In person                                 | 4349 (79.2)            |
| By telephone                              | 1140 (20.8)            |
| <b>Pain in back/hips (%)</b>              |                        |
| Yes                                       | 1645 (30.0)            |
| of which severe                           | 321 (5.8)              |
| No                                        | 3842 (70.0)            |
| Missing                                   | 2 (0.0)                |
| <b>Pain in neck/shoulders (%)</b>         |                        |
| Yes                                       | 1562 (28.5)            |
| of which severe                           | 246 (4.5)              |
| No                                        | 3925 (71.5)            |
| Missing                                   | 2 (0.0)                |
| <b>Pain in arms/legs (%)</b>              |                        |
| Yes                                       | 1243 (22.6)            |
| of which severe                           | 196 (3.6)              |
| No                                        | 4243 (77.3)            |
| Missing                                   | 3 (0.0)                |
| <b>Pain, independent of location (%)</b>  |                        |
| Yes                                       | 2847 (51.9)            |
| of which severe                           | 576 (10.5)             |
| No                                        | 2639 (48.1)            |
| Missing                                   | 3 (0.0)                |
| <b>Smoking status (%)</b>                 |                        |
| Yes                                       | 827 (15.1)             |
| No                                        | 4662 (84.9)            |
| <b>Level of education (%)</b>             |                        |
| Compulsory                                | 589 (10.7)             |
| Secondary                                 | 2889 (52.6)            |
| Higher                                    | 2011 (36.6)            |
| <b>Physical Activity (%)</b>              |                        |
| Practically non                           | 583 (10.6)             |
| Now and then                              | 1613 (29.4)            |
| Regularly                                 | 2077 (37.8)            |
| Regularly strenuous                       | 1216 (22.2)            |

\* In Newton.

**Table 2** Risk estimates for the muscle strength in youth as a determinant of self-reported musculoskeletal pain in adulthood

| Outcomes                    | Models                        |                                   |                         |                                              |                     |
|-----------------------------|-------------------------------|-----------------------------------|-------------------------|----------------------------------------------|---------------------|
|                             | Univariate<br>Muscle strength |                                   |                         | Multivariate <sup>a</sup><br>Muscle strength |                     |
|                             | Low (N=1371)<br>RR (N)        | Average (N=2747)<br>Reference (N) | High (N=1371)<br>RR (N) | Low<br>RR (95% CI)                           | High<br>RR (95% CI) |
| Musculoskeletal pain        | 0.92 (668)                    | 1 (1457)                          | 0.99 (722)              | 0.93 (0.87-0.99)                             | 0.99 (0.93-1.05)    |
| Severe musculoskeletal pain | 0.96 (135)                    | 1 (283)                           | 1.12 (158)              | 0.96 (0.79-1.18)                             | 1.07 (0.89-1.29)    |
| Pain in back/hips           | 0.92 (384)                    | 1 (832)                           | 1.03 (429)              | 0.93 (0.84-1.03)                             | 1.03 (0.94-1.13)    |
| Pain in neck/shoulders      | 0.92 (366)                    | 1 (799)                           | 0.99 (397)              | 0.93 (0.83-1.03)                             | 1.00 (0.90-1.10)    |
| Pain in arms/legs           | 0.97 (297)                    | 1 (616)                           | 1.07 (330)              | 0.97 (0.86-1.10)                             | 1.06 (0.94-1.19)    |

N= Number of cases

RR= Relative risk estimates

CI= Confidence interval

a= adjusted for smoking status, physical activity, education, body mass index

1

1  
2  
3  
4  
5  
6  
7  
8  
9  
10  
11  
12  
13  
14  
15  
16  
17  
18  
19  
20  
21  
22  
23  
24  
25  
26  
27  
28  
29  
30  
31  
32  
33  
34  
35  
36  
37  
38  
39  
40  
41  
42  
43  
44  
45  
46  
47  
48  
49  
50  
51  
52  
53  
54  
55  
56  
57  
58  
59  
60

# Muscle Strength in Adolescent Men and Future Musculoskeletal Pain: A Cohort Study with 17 Years of Follow-up

Simon Timpka<sup>1</sup>, Ingemar F Petersson<sup>1</sup>, Caddie Zhou<sup>1</sup>, Martin Englund<sup>1, 2</sup>

1 Department of Orthopedics, Clinical Sciences Lund, Lund University, Lund, Sweden

2 Clinical Epidemiology Research & Training Unit, Boston, University School of Medicine, Boston, Massachusetts, United States of America

Corresponding author:

Simon Timpka  
Skånes universitetssjukhus  
Epi-centrum Skåne  
Medicon Village  
223 81 Lund  
Sweden

Phone: +46 738 395 276  
Mail: simon.timpka@med.lu.se

Words in main text: 2800  
Number of figures: 1  
Number of tables: 2



## Abstract

### Objectives

Musculoskeletal pain is highly prevalent throughout adulthood with a major impact on health, function and participation in the society. Still, the association between muscle strength and development of musculoskeletal pain is unclear. We aimed to study whether overall muscle strength in adolescent men is associated with self-reported musculoskeletal pain in adulthood.

### Design

Cohort study with baseline data from the Swedish Conscription Register and outcome information from the random population-based Swedish Living Conditions Surveys.

### Setting

Sweden, 1970-2005.

### Participants

We studied 54 8992 men who at age 17-19 years tested their isometric muscle strength (hand grip, arm flexion, knee extension) during the compulsory conscription.

### Outcome measures

The men were surveyed regarding self-reported musculoskeletal pain; mean follow-up time of 17 (range 1-35) years. Our primary outcome was a self-report of musculoskeletal pain, and secondary outcomes were a report of "severe pain", "pain in back/hips", "pain in neck/shoulders", or "pain in arms/legs", respectively. We categorized muscle strength into three groups; low, average, and high using the 25th to 75th percentile to define the reference category (average). We ~~calculated incidence rate ratios~~ estimated relative risks using log binomial regression with adjustment for smoking, body mass index, education, and physical activity.

3

**Results**

In the adjusted model, men with low overall muscle strength had decreased risk of self-reported musculoskeletal pain (~~incidence rate ratio~~ 0.93, 95% confidence interval 0.87-0.99). We observed no such association in men with high strength (0.99, 0.93-1.05). Furthermore, no statistically significant increase or decrease in risk was observed for any of the secondary outcomes.

**Conclusion**

In men, low overall isometric muscle strength in youth was not associated with an increased risk of future musculoskeletal pain. Contrarily, we observed a slightly decreased risk of self-reported musculoskeletal pain in adulthood. Residual confounding by adult occupational exposures, leisure time physical activity level and psychosocial factors may have impacted on results.

Formatted: Keep with next

## Article summary

### Article focus

- We aimed to study whether overall muscle strength in youth is inversely associated with the development of musculoskeletal pain in adulthood.

### Key messages

- In contradiction to our expectations, we observed a decreased risk of self-reported musculoskeletal pain in adult men with low overall isometric muscle strength in youth.
- We speculate that low muscle strength may ~~potentially~~ serve as a deselection criterion for activities with high risk of acute injuries or chronic physical overload, factors with negative impact on musculoskeletal health.

### Strengths and limitations of study

- The main strengths of the study are a large sample, the use of three different measures of muscle strength, and comparably long time to follow-up.
- The main limitations of the study are the following; the cohort does not include women, musculoskeletal pain only identified with one question per site, motivation for military service might influence measurement of muscle strength, and the potential for unmeasured or residual confounding.

## Introduction

Musculoskeletal disorders (MSDs), such as low back pain, osteoarthritis, and widespread pain, are highly prevalent in the adult population.<sup>1-3</sup> MSDs also contribute to a substantial burden of disease at middle and older ages.<sup>4</sup> Although pain emanating from the musculoskeletal system might be attributed to a wide range of diseases with diverse causal chains, many MSDs have common risk factors such as heavy occupational work load,<sup>5,6</sup> a high body mass index (BMI),<sup>7-9</sup> and a low socio-economy.<sup>10-12</sup> Although smoking in some studies have been identified as a risk factor for certain MSDs,<sup>13,14</sup> its main effect on musculoskeletal pain might be as an effect modifier of the pain sensation.<sup>15</sup> As physical work load is a risk factor for many MSDs,<sup>16</sup> a model in which the muscle strength in the loaded parts of the body are protective for future disorders is appealing.

Furthermore, physical exercise with focus on muscle strength is an important secondary and tertiary prevention of MSDs.<sup>17,18</sup> A handful of studies have hitherto longitudinally investigated the strength of isolated muscle groups in adulthood as a determinant of later MSDs.<sup>19-22</sup> However, in adult subjects, there is for the time being conflicting evidence of the value of muscle strength as a protective factor of musculoskeletal pain, such as neck/shoulder pain and low back pain.<sup>19</sup>

In the longer perspective, relatively little is known about the association of muscle strength in youth and later disease, including musculoskeletal pain.<sup>23</sup> Two studies have investigated the result of single muscle strength tests as determinants of musculoskeletal complaints decades later.<sup>24,25</sup> The first, using number of sit-ups during 30 seconds as a strength measure, found no association with later low back pain or tension neck in men. In women, the high strength group had a decreased odds ratio (OR) of tension neck.<sup>24</sup> The second study found a decreased OR for MSDs in men who either had a strong performance in isotonic bench press or in a isometric two hand lift test.<sup>25</sup> Neither of the two studies includes a measure of overall muscular capacity. In summary, although there is some evidence of an association between low muscle strength in youth and later risk of MSDs, the association between overall muscle strength in adolescence and later musculoskeletal pain has not

1  
2  
3  
4  
5  
6  
7 been studied. Furthermore, with a larger sample size, data on common risk factors, testing of three  
8 different muscle groups, and data on physical work capacity, we address some of the limitations of  
9 earlier studies.  
10

11  
12 Our aim in this study was to investigate the general muscle strength in adolescent males as a  
13 determinant of later self-reported musculoskeletal pain. We hypothesized that low general muscle  
14 strength in youth is associated with an increased risk of having musculoskeletal pain in adulthood.  
15  
16  
17

## 18 19 20 **Methods**

21  
22 For this prospective register-based cohort study, we used two main two main criteria to identify  
23 the study sample cohort. First, when typically aged 18, the subjects should have performed  
24 mandatory conscription testing in Sweden between 1970-1994, with the exception of the years 1978  
25 and 1985. Secondly, they should have been included in the Swedish Living Conditions Surveys any  
26 year between 1980 and 2005 when questions regarding musculoskeletal problems, smoking status,  
27 and physical activity were simultaneously included.  
28  
29

30  
31 Furthermore, we excluded all men who were surveyed prior to the baseline testing or were younger  
32 than 17 years or older than 19 years at baseline (Table 1). We also excluded men with an existing  
33 musculoskeletal disorder (Diseases of the musculoskeletal system and connective tissue according to  
34 the International classification of disease version 8 or 9) and those who had missing data on variables  
35 included in the primary model (muscle strength, smoking, BMI, physical activity, level of education).  
36  
37

38  
39 In the final study sample we included 54 ~~8992~~ men (figure 1). Data from the Swedish conscription  
40 testing has been previously used for research purposes.<sup>26-28</sup> During the period of the study sample  
41 testing, conscription was mandatory by law for all Swedish men. Specially trained employees at six  
42 regional conscription center offices administrated the conscription tests during a two-day session that  
43 also included separate evaluations by a medical doctor and a psychologist. Only men with serious  
44 health complaints, were excused from conscription. The procedure included measurements of each  
45  
46  
47  
48  
49  
50  
51  
52  
53  
54  
55  
56  
57  
58  
59  
60

subject's weight in underwear to the kilogram and height without shoes to the centimeter. Using height and weight, we calculated BMI as height/kg<sup>2</sup>. Probably due to rare errors of data entry, there are unlikely extreme values in the dataset. Therefore, we excluded all subjects with registered extreme values on height (<150, >210 cm), weight (<40, >150 kg), or an extreme calculated value for BMI (<15, >60) (figure 1). The study was approved by the Ethical Review Board at Lund University and the manuscript was prepared according to the STROBE-statement.<sup>29</sup>

### *Muscle strength*

The men performed three tests of isometric muscle strength during conscription; hand grip, elbow flexion, and knee extension. At the start of test period in 1970, the tests were performed as previously described<sup>30</sup> and remained unchanged in general throughout the test period. In summary, hand grip strength on the preferred side was measured with a 90° flexion at the elbow and with the humerus in parallel to the torso. Knee extension was measured in a sitting position with 90° knee flexion and arms crossed over chest. The pelvis was fixed to the seat and a strap fastened above the lateral malleolus. Also, elbow flexion was measured in a sitting position with 90° flexion at the elbow and the humerus in parallel to the torso. A strap was fastened at the level of the radial styloid process.

We calculated a measure of general muscle strength by standardizing and combining the three tests of muscle strength. To avoid bias due to change of testing procedure over time, we categorized the cohort into five subgroups based on period of conscription (1970-1973, 1974-1977, 1979-1984, 1986-1990, 1990-1994) and for each subcohort group calculated the relative muscle strength. We standardized the three tests of muscle strength [standardized value= (value–mean)/standard deviation] within each subgroup and used the mean of the three test scores as a proxy for general muscle strength. Using percentiles, we then categorized the cohort into three groups of muscle strength, where the 25<sup>th</sup> to 75<sup>th</sup> percentile defined the average category, the bottom 25<sup>th</sup> percentile configured the low category, and the top 25<sup>th</sup> percentile defined the high muscle strength category.

### Survey of musculoskeletal pain

The Swedish Living Conditions Surveys (ULF) is a random population based survey conducted by Statistics Sweden, previously used for research purposes.<sup>31-33</sup> For the present study, we used data collected during a total of 10 years (1980, 1988, 1989, 1997-1999, 2002-2005). The surveys were generally performed as interviews in person by trained interviewers, with a minority of the interviews performed by phone. For men included in more than one survey, we used the last survey without relevant study data missing.

At follow-up, the men were asked three questions regarding any current musculoskeletal pain: 1) Do you have pain in neck or shoulders? 2) Do you have back-pain, hip-pain or sciatica? 3) Do you have ache, pain in hands, elbows, legs or knees? For each type of complaint one of three answers was possible: 1) Yes, severe 2) Yes, mild and 3) No. Our primary outcome was having reported either severe or mild musculoskeletal pain, whereas our secondary outcomes we defined as follows: 1) Having reported severe musculoskeletal pain 2) Having reported pain in back/hips 3) Having reported pain in shoulders/neck 4) Having reported pain in arms/legs. From the surveys, we also included data on self-reported current smoking status (yes/no), physical activity (practically none, now and then, regularly, regularly strenuous), and level of education (compulsory school or less, secondary education, higher education). Drop-outs from the survey, i.e. those who have declined participation, cannot be individually identified. However, during the years of survey used in this study, the participation rate in the survey among men in relevant age groups were 70.0-88.7%. of the men who were asked to be included in the relevant age groups, 11.3-31.0% declined participation in the years of study. The mean rate of non-participation over the relevant years in the same group was 22.9%.

Formatted: Keep with next

### Statistical analyses

All analyses were performed with SAS 9.3 (SAS Institute Inc). We used logistic binomial regression to estimate ~~incidence rate ratios~~ *relative risks* (RR) and control potential confounders. In the multivariate model (primary model), we included muscle strength, BMI, smoking status, physical activity and level of education.

### *Sensitivity analyses*

Formatted: Font: Italic

To test whether cardiovascular aspects of physical capacity confounded our results, we used physical work capacity measured as  $W_{\max 6 \text{ min}}$  in a sensitivity analysis. For  $W_{\max 6 \text{ min}}$ , the test result is an estimate of maximum work sustainable for 6 minutes<sup>34</sup> and is in young men correlated with maximum oxygen uptake ( $r=0.9$ ).<sup>35 36</sup> Acceptable data quality on work capacity was available in the subsample of men performing the baseline testing in 1976-1982. Out of all men in the cohort conscripted during the time period, 1154 men (74.6 %) completed an acceptable physical work capacity test on a bicycle ergometer (i.e. heart rate  $>174$  at the end of testing). We added the work capacity in relation to body weight as a continuous variable to the univariate model. Furthermore, we also performed two sensitivity analyses on the multivariate model with musculoskeletal pain as the dependent variable. In the first, we added test center to the model. For the second, to test whether our categorization of muscle strength influenced the results, we 1) treated the standardized muscle strength as a continuous variable 2) treated the standardized muscle strength as a categorical variable based on quintiles.



## Results

The mean time to follow-up was 17 years (table 1). Men with low muscle strength did not have an increased risk, but rather a statistically significant decreased risk, for the primary outcome "Musculoskeletal pain" (table 2). To summarize the observations of the secondary outcomes, we did not observe any statistically significant risk increases for neither men with a low nor high muscle strength. Compared to the crude model, the multivariate model produced similar risk estimates.

### *Sensitivity analyses*

Work capacity had a significant effect in the subsample analysis ( $p=0.034$ ) whereas it had only minor effect on the risk estimates for musculoskeletal pain, being 0.94 (95% confidence interval 0.82-1.08) and 1.02 (0.90-1.16) for low and high strength, respectively. The pattern of association in the secondary outcomes were in general somewhat strengthened when we adjusted for work capacity (data not shown). Using muscle strength as a continuous variable (hence assuming a linear relationship) did weaken the association with later musculoskeletal pain ( $p=0.232$ ). When we instead used quintiles to categorize muscle strength, we observed no increased risk for the group with lowest strength compared to average strength (IRR=0.93, 95% confidence interval 0.85-1.01).

## Discussion

Investigating the overall isometric muscle strength in adolescent men as a determinant of future musculoskeletal pain, we observed a decreased risk of self-reported musculoskeletal pain in men with low muscle strength. No such association was observed for men with high strength. We also found a similar, however not statistically significant, pattern for "pain in back/hips" and "pain in neck/shoulders", whereas no association was found for future problems in arms/legs. Noticeably the observed associations were in contradiction to our expectations.

Using a historical cohort design with prospective registration of exposure and the outcome, our study includes a large sample and thus allows better control for known confounders compared to previous studies. All covariates (muscle strength, BMI, smoking, education, physical activity) included in the multivariate model for musculoskeletal pain also had a significant association with the outcome. Furthermore, by controlling for work capacity, we aimed to isolate the direct effect of muscle strength from other aspects of physical capacity. However, the study also has important limitations. First and foremost, we have used strength data from military conscription testing. Although it provides a rich dataset from a structured environment, we do not know how the subject's motivation for military service may have biased the performance during the testing procedure. However, assuming there is no association between motivation at conscription testing and later risk of musculoskeletal pain (or the loss to follow-up) any bias would at most dilute our result. Nevertheless, stronger recruits are more likely to be assigned to positions with heavy load duty. Secondly, the conscription was mandatory for men only. As the pattern of physical activity and occupational exposure differ between men and women, any generalization of the results to women must be made with great caution. Third, the physical activity measurement consisted of a single question and did neither allow calculation of metabolic equivalent of task (MET) nor included occupational exposure. Also musculoskeletal pain is measured by questions that combine more than one site, decreasing the precision. However, the categories are fairly well demarcated anatomically save for the question regarding pain in arms/legs. Fourth, the covariates collected with musculoskeletal pain at follow-up (smoking, physical activity, level of education) are cross-sectional and might thus be mediators of reverse causation. However, the adjusted estimates are much in line with the crude estimates.

It has [previously](#) been suggested that there is a U-shaped association between physical activity and later back pain.<sup>37 38</sup> Furthermore, as former occupational exposure and certain sport participation are established risk factors for future MSDs,<sup>16 39</sup> it lends some evidence for a more general model, in which certain forms of physical activity is negative for the musculoskeletal health. Primarily, our observations do not support low muscle strength in youth as a risk factor for later musculoskeletal

1  
2  
3  
4  
5  
6  
7 pain. Instead, we ~~speculatesuggest~~ that our results can be explained by muscle strength in youth  
8 being one selection criterion for future high risk activities with a negative influence on the  
9 musculoskeletal health, e.g. higher risk of joint injury due to sports participation or manual repetitive  
10 work load. This would also include more immediate exposure such as more physically demanding  
11 military service.<sup>40</sup> Although we have controlled for level of education, which might serve as a proxy  
12 for occupational exposure, there is potential for residual confounding as we did not have more  
13 appropriate data. In other words, individuals with low general muscle strength might to a certain  
14 degree be deselected for high risk activities compared to men with an average or high strength.  
15

16  
17 However, this is only one of many possible explanations. For example, the strength of an individual is  
18 associated with the muscle fiber type distribution, which have a large genetic component.<sup>41</sup> Type I  
19 fibers are more common in endurance athletes<sup>42</sup> whereas high type II percentage have been  
20 reported to be associated with isometric muscle strength<sup>43</sup> as well as low back pain.<sup>44</sup> Thus, our  
21 observations could potentially be explained by both social and biological factors. we cannot exclude  
22 that the decreased risk observed in men with low strength is mediated by factors related to muscle  
23 fiber type.  
24

25  
26 Partly in contrast with a previous study,<sup>25</sup> we did not observe a negative effect of low muscle  
27 strength on the risk future of musculoskeletal problems in men. Although we in the present study  
28 only include measurements of isometric strength, the previous study observed associations with  
29 both an isometric strength measure (static two hand lift) and an isotonic strength measure (bench  
30 press). In a study on the same cohort, it is reported that the result in bench press, but not two hand  
31 lift, was associated with both future cardiovascular fitness and future physical activity,<sup>45</sup> potentially  
32 explaining part of the difference. ~~As a~~ another study reported flexibility as a sit and reach test,<sup>24</sup> but  
33 not strength measured as sit-ups, to be negatively associated with future risk of back pain. Hence, it  
34 is possible that other aspects of muscular and musculoskeletal function is of greater importance of  
35 future risk of MSDs than isometric muscle strength.  
36  
37  
38  
39  
40  
41  
42  
43  
44  
45  
46  
47  
48  
49  
50  
51  
52  
53  
54  
55  
56  
57  
58  
59  
60

1  
2  
3  
4  
5  
6  
7 The association between muscle strength and later musculoskeletal pain diminished when we used  
8 muscle strength as a continuous variable. This was not surprising, as the observed association was  
9 non linear in the primary model. It is to be expected that the test ~~offices~~~~centers~~ differ somewhat in  
10 their reported test results, as they were assigned adolescents based on geography. However,  
11 including test ~~office~~~~center~~s in the model did not have any effect on the overall association. When we  
12 included work capacity in the model, most risk estimates decreased in absolute values, furthering  
13 strengthening the observations in the primary model. By using the relative muscle strength during  
14 testing periods of five years, we partially address the potential systematic change in testing  
15 procedure over the years. Although the methods of measurements have not changed at large, minor  
16 adjustments cannot be excluded.

17  
18 Although we found no increased risk of future musculoskeletal problems in men with low muscle  
19 strength in adolescence, future studies need to better quantify the occupational exposure and leisure  
20 time physical activity. Since the physical activity pattern and physical fitness profiles differ between  
21 men and women, further investigations are also needed to investigate if similar associations can be  
22 found in women.

23  
24  
25  
26  
27  
28  
29  
30  
31  
32  
33  
34  
35  
36 ~~In contrast to our hypothesis, w~~We observed a decreased risk of self-reported musculoskeletal pain  
37 in adult men with low overall isometric muscle strength in youth. We ~~speculate~~~~hypothesize~~ that low  
38 muscle strength *per se* is not protective of future musculoskeletal pain. Instead, low muscle strength  
39 might serve as a deselection criterion for professions or types of leisure time physical activity with  
40 higher risk of acute injuries or chronic physical overload, factors with negative impact on  
41 musculoskeletal health.

## 42 43 44 45 46 47 48 **Acknowledgements**

49  
50  
51 No author has a conflict of interest to report. The authors would like to thank Charlotte Bergknot for  
52 the initial data management.  
53  
54  
55  
56  
57  
58  
59  
60

## Funding

The authors are supported by grants from The Swedish Research Council, Skåne Regional Council, and the Faculty of Medicine at Lund University. The funders neither influenced the study process nor manuscript preparation.

## Author contributions

ST proposed the study idea, collected data, designed the study, and drafted the manuscript. IP designed the study and provided input during manuscript preparation. CZ designed the study and performed the statistical analyses. ME designed the study, collected data, and provided input during manuscript preparation. All authors approved the final version of the manuscript.

## Data sharing statement

There is no additional data to share.

## References

1. Bergman S, Herrstrom P, Hogstrom K, Petersson IF, Svensson B, Jacobsson LT. Chronic musculoskeletal pain, prevalence rates, and sociodemographic associations in a Swedish population study. *J Rheumatol* 2001;28(6):1369-77.
2. Picavet HS, Schouten JS. Musculoskeletal pain in the Netherlands: prevalences, consequences and risk groups, the DMC(3)-study. *Pain* 2003;102(1-2):167-78.
3. Urwin M, Symmons D, Allison T, Brammah T, Busby H, Roxby M, et al. Estimating the burden of musculoskeletal disorders in the community: the comparative prevalence of symptoms at different anatomical sites, and the relation to social deprivation. *Ann Rheum Dis* 1998;57(11):649-55.

4. Murray CJ, Vos T, Lozano R, Naghavi M, Flaxman AD, Michaud C, et al. Disability-adjusted life years (DALYs) for 291 diseases and injuries in 21 regions, 1990-2010: a systematic analysis for the Global Burden of Disease Study 2010. *Lancet* 2013;380(9859):2197-223.
5. van der Windt DA, Thomas E, Pope DP, de Winter AF, Macfarlane GJ, Bouter LM, et al. Occupational risk factors for shoulder pain: a systematic review. *Occup Environ Med* 2000;57(7):433-42.
6. Hoogendoorn WE, van Poppel MN, Bongers PM, Koes BW, Bouter LM. Physical load during work and leisure time as risk factors for back pain. *Scand J Work Environ Health* 1999;25(5):387-403.
7. Felson DT, Zhang Y, Hannan MT, Naimark A, Weissman B, Aliabadi P, et al. Risk factors for incident radiographic knee osteoarthritis in the elderly: the Framingham Study. *Arthritis Rheum* 1997;40(4):728-33.
8. Shiri R, Karppinen J, Leino-Arjas P, Solovieva S, Viikari-Juntura E. The association between obesity and low back pain: a meta-analysis. *Am J Epidemiol* 2010;171(2):135-54.
9. Grotle M, Hagen KB, Natvig B, Dahl FA, Kvien TK. Obesity and osteoarthritis in knee, hip and/or hand: an epidemiological study in the general population with 10 years follow-up. *BMC Musculoskelet Disord* 2008;9:132.
10. Hagen K, Zwart JA, Svebak S, Bovim G, Jacob Stovner L. Low socioeconomic status is associated with chronic musculoskeletal complaints among 46,901 adults in Norway. *Scand J Public Health* 2005;33(4):268-75.
11. Dalstra JA, Kunst AE, Borrell C, Breeze E, Cambois E, Costa G, et al. Socioeconomic differences in the prevalence of common chronic diseases: an overview of eight European countries. *Int J Epidemiol* 2005;34(2):316-26.
12. Bengtsson C, Nordmark B, Klareskog L, Lundberg I, Alfredsson L. Socioeconomic status and the risk of developing rheumatoid arthritis: results from the Swedish EIRA study. *Ann Rheum Dis* 2005;64(11):1588-94.

- 1  
2  
3  
4  
5  
6  
7 13. Palmer KT, Syddall H, Cooper C, Coggon D. Smoking and musculoskeletal disorders: findings from  
8 a British national survey. *Ann Rheum Dis* 2003;62(1):33-6.  
9
- 10 14. Holth HS, Werpen HK, Zwart JA, Hagen K. Physical inactivity is associated with chronic  
11 musculoskeletal complaints 11 years later: results from the Nord-Trondelag Health Study.  
12 *BMC Musculoskelet Disord* 2008;9:159.  
13
- 14 15. McBeth J, Jones K. Epidemiology of chronic musculoskeletal pain. *Best Pract Res Clin Rheumatol*  
15 2007;21(3):403-25.  
16
- 17 16. Roquelaure Y, Ha C, Rouillon C, Fouquet N, Leclerc A, Descatha A, et al. Risk factors for upper-  
18 extremity musculoskeletal disorders in the working population. *Arthritis Rheum*  
19 2009;61(10):1425-34.  
20
- 21 17. Hakkinen A, Sokka T, Kotaniemi A, Hannonen P. A randomized two-year study of the effects of  
22 dynamic strength training on muscle strength, disease activity, functional capacity, and bone  
23 mineral density in early rheumatoid arthritis. *Arthritis Rheum* 2001;44(3):515-22.  
24
- 25 18. Baker KR, Nelson ME, Felson DT, Layne JE, Sarno R, Roubenoff R. The efficacy of home based  
26 progressive strength training in older adults with knee osteoarthritis: a randomized  
27 controlled trial. *J Rheumatol* 2001;28(7):1655-65.  
28
- 29 19. Hamberg-van Reenen HH, Ariens GA, Blatter BM, van Mechelen W, Bongers PM. A systematic  
30 review of the relation between physical capacity and future low back and neck/shoulder  
31 pain. *Pain* 2007;130(1-2):93-107.  
32
- 33 20. Leino P, Aro S, Hasan J. Trunk muscle function and low back disorders: a ten-year follow-up study.  
34 *J Chronic Dis* 1987;40(4):289-96.  
35
- 36 21. Kujala UM, Taimela S, Viljanen T, Jutila H, Viitasalo JT, Videman T, et al. Physical loading and  
37 performance as predictors of back pain in healthy adults. A 5-year prospective study. *Eur J*  
38 *Appl Physiol Occup Physiol* 1996;73(5):452-8.  
39  
40  
41  
42  
43  
44  
45  
46  
47  
48  
49  
50  
51  
52  
53  
54  
55  
56  
57  
58  
59  
60

- 1  
2  
3  
4  
5  
6  
7 22. Faber A, Sell L, Hansen JV, Burr H, Lund T, Holtermann A, et al. Does muscle strength predict  
8 future musculoskeletal disorders and sickness absence? *Occupational medicine (Oxford,*  
9 *England)* 2012;62(1):41-6.  
10  
11 23. Ruiz JR, Castro-Pinero J, Artero EG, Ortega FB, Sjostrom M, Suni J, et al. Predictive validity of  
12 health-related fitness in youth: a systematic review. *Br J Sports Med* 2009;43(12):909-23.  
13  
14 24. Mikkelsen LO, Nupponen H, Kaprio J, Kautiainen H, Mikkelsen M, Kujala UM. Adolescent  
15 flexibility, endurance strength, and physical activity as predictors of adult tension neck, low  
16 back pain, and knee injury: a 25 year follow up study. *Br J Sports Med* 2006;40(2):107-13.  
17  
18 25. Barnekow-Bergkvist M, Hedberg GE, Janlert U, Jansson E. Determinants of self-reported neck-  
19 shoulder and low back symptoms in a general population. *Spine (Phila Pa 1976)*  
20 1998;23(2):235-43.  
21  
22 26. Neovius M, Sundstrom J, Rasmussen F. Combined effects of overweight and smoking in late  
23 adolescence on subsequent mortality: nationwide cohort study. *BMJ* 2009;338:b496.  
24  
25 27. Nilsson PM, Nyberg P, Ostergren PO. Increased susceptibility to stress at a psychological  
26 assessment of stress tolerance is associated with impaired fetal growth. *Int J Epidemiol*  
27 2001;30(1):75-80.  
28  
29 28. Hemmingsson T, Melin B, Allebeck P, Lundberg I. The association between cognitive ability  
30 measured at ages 18-20 and mortality during 30 years of follow-up--a prospective  
31 observational study among Swedish males born 1949-51. *Int J Epidemiol* 2006;35(3):665-70.  
32  
33 29. von Elm E, Altman DG, Egger M, Pocock SJ, Gotsche PC, Vandenbroucke JP. Strengthening the  
34 Reporting of Observational Studies in Epidemiology (STROBE) statement: guidelines for  
35 reporting observational studies. *BMJ* 2007;335(7624):806-8.  
36  
37 30. Nordesjo LO, Schéle R. Validity of Ergometer Cycle Test and Measures of Isometric Muscle  
38 Strength when Predicting some Aspects of Military Performance. *Swedish J Defence Med*  
39 1974(10):11-23.  
40  
41  
42  
43  
44  
45  
46  
47  
48  
49  
50  
51  
52  
53  
54  
55  
56  
57  
58  
59  
60



- 1  
2  
3  
4  
5  
6  
7 31. Wolk A, Rossner S. Effects of smoking and physical activity on body weight: developments in  
8 Sweden between 1980 and 1989. *J Intern Med* 1995;237(3):287-91.  
9  
10 32. Sundquist J, Johansson SE. The influence of socioeconomic status, ethnicity and lifestyle on body  
11 mass index in a longitudinal study. *Int J Epidemiol* 1998;27(1):57-63.  
12  
13 33. Bygren LO, Konlaan BB, Johansson SE. Attendance at cultural events, reading books or  
14 periodicals, and making music or singing in a choir as determinants for survival: Swedish  
15 interview survey of living conditions. *BMJ* 1996;313(7072):1577-80.  
16  
17 34. Tornvall G. Assessment of physical capabilities. *Acta physiologica Scandinavica* 1963;58(Suppl  
18 201):1-102.  
19  
20 35. Nordesjo LO. A comparison between the Thornvall maximal ergometer test, submaximal  
21 ergometer tests and maximal oxygen uptake. *Swedish J Defence Med* 1974(10):3-10.  
22  
23 36. Nordesjo LO. Estimation of the maximal work rate sustainable for 6 minutes using a single-level  
24 load or stepwise increasing loads. *Ups J Med Sci* 1974;79(1):45-50.  
25  
26 37. Heneweer H, Vanhees L, Picavet HS. Physical activity and low back pain: a U-shaped relation?  
27 *Pain* 2009;143(1-2):21-5.  
28  
29 38. Heneweer H, Picavet HS, Staes F, Kiers H, Vanhees L. Physical fitness, rather than self-reported  
30 physical activities, is more strongly associated with low back pain: evidence from a working  
31 population. *Eur Spine J* 2012;21(7):1265-72.  
32  
33 39. Kujala UM, Kettunen J, Paananen H, Aalto T, Battie MC, Impivaara O, et al. Knee osteoarthritis in  
34 former runners, soccer players, weight lifters, and shooters. *Arthritis Rheum* 1995;38(4):539-  
35 46.  
36  
37 40. Almeida SA, Williams KM, Shaffer RA, Brodine SK. Epidemiological patterns of musculoskeletal  
38 injuries and physical training. *Med Sci Sports Exerc* 1999;31(8):1176-82.  
39  
40 41. Simoneau JA, Bouchard C. Genetic determinism of fiber type proportion in human skeletal  
41 muscle. *FASEB J* 1995;9(11):1091-5.  
42  
43  
44  
45  
46  
47  
48  
49  
50  
51  
52  
53  
54  
55  
56  
57  
58  
59  
60

- 1  
2  
3  
4  
5  
6  
7 42. Costill DL, Daniels J, Evans W, Fink W, Krahenbuhl G, Saltin B. Skeletal muscle enzymes and fiber  
8 composition in male and female track athletes. *J Appl Physiol* 1976;40(2):149-54.  
9  
10 43. Tesch P, Karlsson J. Isometric strength performance and muscle fibre type distribution in man.  
11  
12 *Acta physiologica Scandinavica* 1978;103(1):47-51.  
13  
14 44. Mannion AF, Weber BR, Dvorak J, Grob D, Muntener M. Fibre type characteristics of the lumbar  
15 paraspinal muscles in normal healthy subjects and in patients with low back pain. *J Orthop*  
16  
17 *Res* 1997;15(6):881-7.  
18  
19 45. Barnekow-Bergkvist M, Hedberg G, Janlert U, Jansson E. Prediction of physical fitness and  
20  
21 physical activity level in adulthood by physical performance and physical activity in  
22  
23 adolescence--an 18-year follow-up study. *Scand J Med Sci Sports* 1998;8(5 Pt 1):299-308.  
24  
25  
26  
27  
28

## 29 **Tables and Figures**

30  
31 **Table 1:** Description of study sample

32  
33 **Table 2:** Risk estimates for the muscle strength in youth as a determinant of self-reported  
34  
35 musculoskeletal pain in adulthood

36  
37 **Figure 1:** The identification of the study sample and the loss to follow-up  
38  
39  
40  
41  
42  
43  
44  
45  
46  
47  
48  
49  
50  
51  
52  
53  
54  
55  
56  
57  
58  
59  
60

Table 1 Description of study sample

|                                           |                        |
|-------------------------------------------|------------------------|
| <b>Number of men</b>                      | 5489                   |
| <b>Mean age at baseline (SD)</b>          | 18.2 (0.5)             |
| <b>Mean time to follow-up (SD, range)</b> | 17.2 years (8.4, 1-35) |
| <b>Mean hand grip* (SD)</b>               | 617 (98)               |
| <b>Mean elbow flexion* (SD)</b>           | 385 (83)               |
| <b>Mean knee extension* (SD)</b>          | 567 (116)              |
| <b>Muscle Strength (%)</b>                |                        |
| Low                                       | 1371 (25.0)            |
| Average                                   | 2747 (50.0)            |
| High                                      | 1371 (25.0)            |
| <b>BMI (%)</b>                            |                        |
| <18.5                                     | 477 (8.7)              |
| 18.5-24.9                                 | 4498 (81.9)            |
| 25-29.9                                   | 448 (8.2)              |
| >30                                       | 66 (1.2)               |
| <b>Type of interview (%)</b>              |                        |
| In person                                 | 4349 (79.2)            |
| By telephone                              | 1140 (20.8)            |
| <b>Pain in back/hips (%)</b>              |                        |
| Yes                                       | 1645 (30.0)            |
| of which severe                           | 321 (5.8)              |
| No                                        | 3842 (70.0)            |
| Missing                                   | 2 (0.0)                |
| <b>Pain in neck/shoulders (%)</b>         |                        |
| Yes                                       | 1562 (28.5)            |
| of which severe                           | 246 (4.5)              |
| No                                        | 3925 (71.5)            |
| Missing                                   | 2 (0.0)                |
| <b>Pain in arms/legs (%)</b>              |                        |
| Yes                                       | 1243 (22.6)            |
| of which severe                           | 196 (3.6)              |
| No                                        | 4243 (77.3)            |
| Missing                                   | 3 (0.0)                |
| <b>Pain, independent of location (%)</b>  |                        |
| Yes                                       | 2847 (51.9)            |
| of which severe                           | 576 (10.5)             |
| No                                        | 2639 (48.1)            |
| Missing                                   | 3 (0.0)                |
| <b>Smoking status (%)</b>                 |                        |
| Yes                                       | 827 (15.1)             |
| No                                        | 4662 (84.9)            |
| <b>Level of education (%)</b>             |                        |
| Compulsory                                | 589 (10.7)             |
| Secondary                                 | 2889 (52.6)            |
| Higher                                    | 2011 (36.6)            |
| <b>Physical Activity (%)</b>              |                        |
| Practically non                           | 583 (10.6)             |
| Now and then                              | 1613 (29.4)            |
| Regularly                                 | 2077 (37.8)            |
| Regularly strenuous                       | 1216 (22.2)            |

\* In Newton.

**Table 2** Risk estimates for the muscle strength in youth as a determinant of self-reported musculoskeletal pain in adulthood

| Outcomes                    | Models                        |                                    |                          |                                              |                           |
|-----------------------------|-------------------------------|------------------------------------|--------------------------|----------------------------------------------|---------------------------|
|                             | Univariate<br>Muscle strength |                                    |                          | Multivariate <sup>a</sup><br>Muscle strength |                           |
|                             | Low (N=1371)<br>IRR (N)       | Average (N=27475)<br>Reference (N) | High (N=1371)<br>IRR (N) | Low<br>IRR (95% CI)                          | High<br>IRR (95% CI)      |
| Musculoskeletal pain        | 0.92 (668)                    | 1 (1457)                           | 0.99 (722)               | 0.93 (0.87-0.99)                             | 0.99 (0.93-1.05)          |
| Severe musculoskeletal pain | 0.96 (135)                    | 1 (283)                            | 1.12 (158)               | 0.96 (0.79-<br>1.187)                        | 1.078 (0.8990-<br>1.2930) |
| Pain in back/hips           | 0.92 (384)                    | 1 (832)                            | 1.03 (429)               | 0.93 (0.84-<br>1.034)                        | 1.03 (0.94-<br>1.1344)    |
| Pain in neck/shoulders      | 0.924 (366)                   | 1 (799)                            | 0.99 (397)               | 0.932 (0.83-<br>1.03)                        | 1.00 (0.90-1.10)          |
| Pain in arms/legs           | 0.97 (297)                    | 1 (616)                            | 1.07 (330)               | 0.97 (0.865-<br>1.10)                        | 1.06 (0.94-1.19)          |

N= Number of cases

IRR= ~~incidence-rate-ratio~~Relative risk estimates

CI= Confidence interval

a= adjusted for smoking status, physical activity, education, body mass index

1  
2  
3  
4  
5  
6  
7  
8  
9  
10  
11  
12  
13  
14  
15  
16  
17  
18  
19  
20  
21  
22  
23  
24  
25  
26  
27  
28  
29  
30  
31  
32  
33  
34  
35  
36  
37  
38  
39  
40  
41  
42  
43  
44  
45  
46  
47  
48  
49  
50  
51  
52  
53  
54  
55  
56  
57  
58  
59  
60

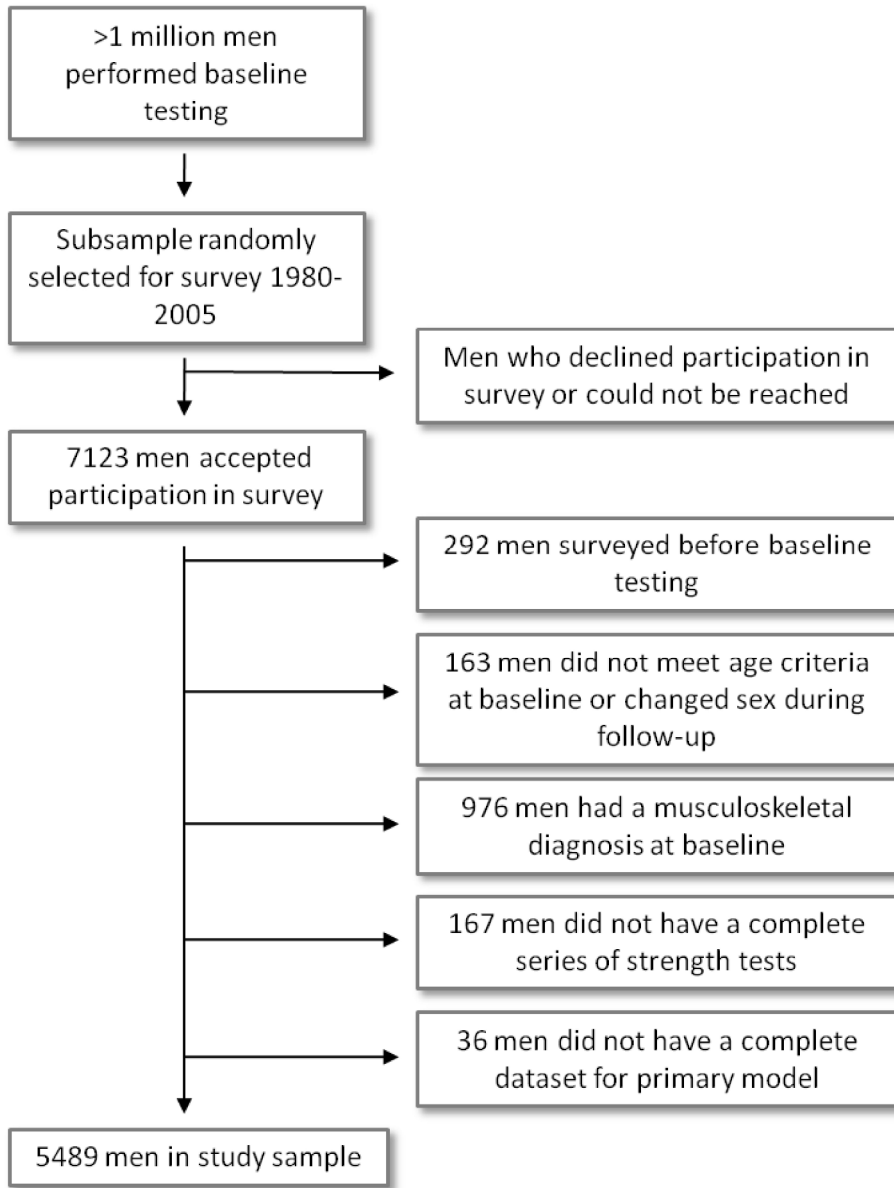

343x452mm (300 x 300 DPI)

STROBE 2007 (v4) Statement—Checklist of items that should be included in reports of *cohort studies*

| Section/Topic                | Item # | Recommendation                                                                                                                                                                       | Reported on page # |
|------------------------------|--------|--------------------------------------------------------------------------------------------------------------------------------------------------------------------------------------|--------------------|
| Title and abstract           | 1      | (a) Indicate the study's design with a commonly used term in the title or the abstract                                                                                               | 1                  |
|                              |        | (b) Provide in the abstract an informative and balanced summary of what was done and what was found                                                                                  | 2-3                |
| <b>Introduction</b>          |        |                                                                                                                                                                                      |                    |
| Background/rationale         | 2      | Explain the scientific background and rationale for the investigation being reported                                                                                                 | 5-6                |
| Objectives                   | 3      | State specific objectives, including any prespecified hypotheses                                                                                                                     | 6                  |
| <b>Methods</b>               |        |                                                                                                                                                                                      |                    |
| Study design                 | 4      | Present key elements of study design early in the paper                                                                                                                              | 6+                 |
| Setting                      | 5      | Describe the setting, locations, and relevant dates, including periods of recruitment, exposure, follow-up, and data collection                                                      | 6-9                |
| Participants                 | 6      | (a) Give the eligibility criteria, and the sources and methods of selection of participants. Describe methods of follow-up                                                           | 6-7                |
|                              |        | (b) For matched studies, give matching criteria and number of exposed and unexposed                                                                                                  | -                  |
| Variables                    | 7      | Clearly define all outcomes, exposures, predictors, potential confounders, and effect modifiers. Give diagnostic criteria, if applicable                                             | 6-9                |
| Data sources/<br>measurement | 8*     | For each variable of interest, give sources of data and details of methods of assessment (measurement). Describe comparability of assessment methods if there is more than one group | 6-9                |
| Bias                         | 9      | Describe any efforts to address potential sources of bias                                                                                                                            | 9                  |
| Study size                   | 10     | Explain how the study size was arrived at                                                                                                                                            | Figure 1           |
| Quantitative variables       | 11     | Explain how quantitative variables were handled in the analyses. If applicable, describe which groupings were chosen and why                                                         | 6-9                |
| Statistical methods          | 12     | (a) Describe all statistical methods, including those used to control for confounding                                                                                                | 9                  |
|                              |        | (b) Describe any methods used to examine subgroups and interactions                                                                                                                  | 9                  |
|                              |        | (c) Explain how missing data were addressed                                                                                                                                          | -                  |
|                              |        | (d) If applicable, explain how loss to follow-up was addressed                                                                                                                       | -                  |
|                              |        | (e) Describe any sensitivity analyses                                                                                                                                                | 9                  |
| <b>Results</b>               |        |                                                                                                                                                                                      |                    |

|                          |     |                                                                                                                                                                                                              |          |
|--------------------------|-----|--------------------------------------------------------------------------------------------------------------------------------------------------------------------------------------------------------------|----------|
| Participants             | 13* | (a) Report numbers of individuals at each stage of study—eg numbers potentially eligible, examined for eligibility, confirmed eligible, included in the study, completing follow-up, and analysed            | Figure 1 |
|                          |     | (b) Give reasons for non-participation at each stage                                                                                                                                                         | Figure 1 |
|                          |     | (c) Consider use of a flow diagram                                                                                                                                                                           | Figure 1 |
| Descriptive data         | 14* | (a) Give characteristics of study participants (eg demographic, clinical, social) and information on exposures and potential confounders                                                                     | Table 1  |
|                          |     | (b) Indicate number of participants with missing data for each variable of interest                                                                                                                          | Table 1  |
|                          |     | (c) Summarise follow-up time (eg, average and total amount)                                                                                                                                                  | Table 1  |
| Outcome data             | 15* | Report numbers of outcome events or summary measures over time                                                                                                                                               | Table 1  |
| Main results             | 16  | (a) Give unadjusted estimates and, if applicable, confounder-adjusted estimates and their precision (eg, 95% confidence interval). Make clear which confounders were adjusted for and why they were included | Table 1  |
|                          |     | (b) Report category boundaries when continuous variables were categorized                                                                                                                                    | 6-9      |
|                          |     | (c) If relevant, consider translating estimates of relative risk into absolute risk for a meaningful time period                                                                                             | -        |
| Other analyses           | 17  | Report other analyses done—eg analyses of subgroups and interactions, and sensitivity analyses                                                                                                               | 9        |
| <b>Discussion</b>        |     |                                                                                                                                                                                                              |          |
| Key results              | 18  | Summarise key results with reference to study objectives                                                                                                                                                     | 10-11    |
| <b>Limitations</b>       |     |                                                                                                                                                                                                              |          |
| Interpretation           | 20  | Give a cautious overall interpretation of results considering objectives, limitations, multiplicity of analyses, results from similar studies, and other relevant evidence                                   | 13-14    |
| Generalisability         | 21  | Discuss the generalisability (external validity) of the study results                                                                                                                                        | 12-13    |
| <b>Other information</b> |     |                                                                                                                                                                                                              |          |
| Funding                  | 22  | Give the source of funding and the role of the funders for the present study and, if applicable, for the original study on which the present article is based                                                | 14       |

\*Give information separately for cases and controls in case-control studies and, if applicable, for exposed and unexposed groups in cohort and cross-sectional studies.

**Note:** An Explanation and Elaboration article discusses each checklist item and gives methodological background and published examples of transparent reporting. The STROBE checklist is best used in conjunction with this article (freely available on the Web sites of PLoS Medicine at <http://www.plosmedicine.org/>, Annals of Internal Medicine at <http://www.annals.org/>, and Epidemiology at <http://www.epidem.com/>). Information on the STROBE Initiative is available at [www.strobe-statement.org](http://www.strobe-statement.org).



**Muscle Strength in Adolescent Men and Future  
Musculoskeletal Pain:  
A Cohort Study with 17 Years of Follow-up**

|                                    |                                                                                                                                                                                                                                                                                                                                                     |
|------------------------------------|-----------------------------------------------------------------------------------------------------------------------------------------------------------------------------------------------------------------------------------------------------------------------------------------------------------------------------------------------------|
| Journal:                           | <i>BMJ Open</i>                                                                                                                                                                                                                                                                                                                                     |
| Manuscript ID:                     | bmjopen-2013-002656.R2                                                                                                                                                                                                                                                                                                                              |
| Article Type:                      | Research                                                                                                                                                                                                                                                                                                                                            |
| Date Submitted by the Author:      | 21-Apr-2013                                                                                                                                                                                                                                                                                                                                         |
| Complete List of Authors:          | Timpka, Simon; Lund University, Department of Orthopedics<br>Pettersson, Ingemar; Lund University, Department of Orthopedics<br>Zhou, Caddie; Lund University, Department of Orthopedics<br>Englund, Martin; Lund University, Department of Orthopedics; Boston<br>University School of Medicine, Clinical Epidemiology Research & Training<br>Unit |
| <b>Primary Subject<br>Heading</b>: | Epidemiology                                                                                                                                                                                                                                                                                                                                        |
| Secondary Subject Heading:         | Sports and exercise medicine, Rheumatology, Public health                                                                                                                                                                                                                                                                                           |
| Keywords:                          | Musculoskeletal disorders < ORTHOPAEDIC & TRAUMA SURGERY, SPORTS<br>MEDICINE, PREVENTIVE MEDICINE                                                                                                                                                                                                                                                   |
|                                    |                                                                                                                                                                                                                                                                                                                                                     |

SCHOLARONE™  
Manuscripts



1  
2  
3  
4  
5  
6  
7  
8  
9  
10  
11  
12  
13  
14  
15  
16

# Muscle Strength in Adolescent Men and Future Musculoskeletal Pain:

## A Cohort Study with 17 Years of Follow-up

17  
18  
19  
20  
21  
22  
23  
24  
25  
26  
27  
28  
29  
30  
31  
32  
33  
34  
35  
36  
37  
38  
39  
40  
41  
42  
43  
44  
45  
46  
47  
48  
49  
50  
51  
52  
53  
54  
55  
56  
57  
58  
59  
60

Simon Timpka<sup>1</sup>, Ingemar F Petersson<sup>1</sup>, Caddie Zhou<sup>1</sup>, Martin Englund<sup>1, 2</sup>

1 Department of Orthopedics, Clinical Sciences Lund, Lund University, Lund, Sweden

2 Clinical Epidemiology Research & Training Unit, Boston University School of Medicine, Boston, Massachusetts, United States of America

Corresponding author:

Simon Timpka  
Skånes universitetssjukhus  
Epi-centrum Skåne  
Medicon Village  
223 81 Lund  
Sweden

Phone: +46 738 395 276

Mail: [simon.timpka@med.lu.se](mailto:simon.timpka@med.lu.se)

Words in main text: 2868

Number of figures: 1

Number of tables: 2

## Abstract

### Objectives

Musculoskeletal pain is highly prevalent throughout adulthood with a major impact on health, function and participation in the society. Still, the association between muscle strength and development of musculoskeletal pain is unclear. We aimed to study whether overall muscle strength in adolescent men is associated with self-reported musculoskeletal pain in adulthood.

### Design

Cohort study with baseline data from the Swedish Conscription Register and outcome information from the random population-based Swedish Living Conditions Surveys.

### Setting

Sweden, 1970-2005.

### Participants

We studied 5489 men who at age 17-19 years tested their isometric muscle strength (hand grip, arm flexion, knee extension) during the compulsory conscription.

### Outcome measures

The men were surveyed regarding self-reported musculoskeletal pain; mean follow-up time of 17 (range 1-35) years. Our primary outcome was a self-report of musculoskeletal pain, and secondary outcomes were a report of "severe pain", "pain in back/hips", "pain in neck/shoulders", or "pain in arms/legs", respectively. We categorized muscle strength into three groups; low, average, and high using the 25th to 75th percentile to define the reference category (average). We estimated relative risks using log binomial regression with adjustment for smoking, body mass index, education, and physical activity.

**Results**

In the adjusted model, men with low overall muscle strength had decreased risk of self-reported musculoskeletal pain (0.93, 95% confidence interval 0.87-0.99). We observed no such association in men with high strength (0.99, 0.93-1.05). Furthermore, no statistically significant increase or decrease in risk was observed for any of the secondary outcomes.

**Conclusion**

In men, low overall isometric muscle strength in youth was not associated with an increased risk of future musculoskeletal pain. Contrarily, we observed a slightly decreased risk of self-reported musculoskeletal pain in adulthood. Our results does not support a model in which low muscle strength is a risk factor for future musculoskeletal pain.

## Article summary

### Article focus

- We aimed to study whether overall muscle strength in youth is inversely associated with the development of musculoskeletal pain in adulthood.

### Key messages

- In contradiction to our expectations, we observed a decreased risk of self-reported musculoskeletal pain in adult men with low overall isometric muscle strength in youth. The study does not provide evidence in support of a theoretical model in which low muscle strength in young men is associated with an increased risk of musculoskeletal pain later in life.

### Strengths and limitations of study

- The main strengths of the study are a large sample, the independent evaluation of exposure and outcome, the combined use of three different measures of muscle strength, and the comparably long time to follow-up.
- The main limitations of the study are the following; the cohort does not include women, musculoskeletal pain only identified with one question per site, the motivation for military service might influence performance in muscle strength testing, and the potential for unmeasured or residual confounding.

## Introduction

Musculoskeletal disorders (MSDs), such as low back pain, osteoarthritis, and widespread pain, are highly prevalent in the adult population.<sup>1-3</sup> MSDs also contribute to a substantial burden of disease at middle and older ages.<sup>4</sup> Although pain emanating from the musculoskeletal system might be attributed to a wide range of diseases with diverse causal chains, many MSDs have common risk factors such as heavy occupational work load,<sup>5,6</sup> a high body mass index (BMI),<sup>7-9</sup> and a low socio-economy.<sup>10-12</sup> Although smoking in some studies have been identified as a risk factor for certain MSDs,<sup>13,14</sup> its main effect on musculoskeletal pain might be as an effect modifier of the pain sensation.<sup>15</sup> As physical work load is a risk factor for many MSDs,<sup>16</sup> a model in which the muscle strength in the loaded parts of the body are protective for future disorders is appealing. This is also the main rationale of studies in the area; does general or demarcated muscle strength have a protective effect on future complaints in the adjacent structures? It is also known that physical exercise with focus on muscle strength is an important secondary and tertiary prevention of MSDs.<sup>17</sup> <sup>18</sup> A handful of studies have hitherto investigated the strength of isolated muscle groups as a determinant of later MSDs in adulthood.<sup>19-22</sup> However, there is conflicting evidence of the value of muscle strength as a protective factor of musculoskeletal pain, such as neck/shoulder pain and low back pain in adult subjects.<sup>19</sup>

When considering muscle strength in youth as a potential risk factor in the longer perspective, its association with later disease of any kind is relatively unknown, including musculoskeletal pain.<sup>23</sup> At least two studies have investigated the result of single muscle strength tests as determinants of musculoskeletal complaints decades later.<sup>24,25</sup> The first study, using number of sit-ups during 30 seconds as a strength measure, found no association with later low back pain or tension neck in men. In women however, the high strength group had a decreased odds ratio (OR) of tension neck.<sup>24</sup> The second study found a decreased OR for MSDs in men who either had a strong performance in isotonic bench press or in a isometric two hand lift test.<sup>25</sup> Neither of the two studies includes a

1  
2  
3 measure of overall muscular capacity. Hence, although there is some evidence of an association  
4  
5 between low muscle strength in youth and later risk of MSDs, the association between overall muscle  
6  
7 strength in adolescence and later musculoskeletal pain has never been studied. Furthermore, with a  
8  
9 larger sample size, data on common risk factors, testing of three different muscle groups, and data  
10  
11 on physical work capacity, we also address some of the limitations of earlier studies.  
12

13  
14 Our aim in this study was to investigate the general muscle strength in adolescent males as a  
15  
16 determinant of later self-reported musculoskeletal pain. We hypothesized that low general muscle  
17  
18 strength in youth is associated with an increased risk of having musculoskeletal pain in adulthood.  
19

## 20 21 22 **Methods**

23  
24  
25 For this prospective register-based cohort study, we used two main inclusion criteria to identify the  
26  
27 study sample. First, when typically aged 18, the subjects should have performed mandatory  
28  
29 conscription testing in Sweden between 1970-1994, with the exception of the years 1978 and 1985.  
30  
31 Second, they should have been included in the Swedish Living Conditions Surveys any year between  
32  
33 1980 and 2005 when questions regarding musculoskeletal problems, smoking status, and physical  
34  
35 activity were simultaneously included.  
36  
37

38  
39 We excluded all men who were surveyed prior to the baseline testing or were younger than 17 years  
40  
41 or older than 19 years at baseline (Table 1). We also excluded men with an existing musculoskeletal  
42  
43 disorder (Diseases of the musculoskeletal system and connective tissue according to the  
44  
45 International classification of disease version 8 or 9) and those who had missing data on variables  
46  
47 included in the primary model (muscle strength, smoking, BMI, physical activity, level of education).  
48  
49 In the final study sample we included 5489 men (figure 1). The Swedish conscription register is well  
50  
51 characterized and has been used for research purposes previously.<sup>26-28</sup> At the time of study sample  
52  
53 testing, conscription was mandatory by law for all Swedish men. Specially trained employees at six  
54  
55 regional conscription offices administrated the conscription tests during a two-day session. The  
56  
57  
58  
59  
60

1  
2  
3 procedure also included separate evaluations by a medical doctor and a psychologist. Only men with  
4 serious health complaints were excused from conscription. The procedure included measurements of  
5 each man's weight in underwear to the kilogram and height without shoes to the centimeter. Using  
6 height and weight, we calculated BMI as height/kg<sup>2</sup>. Probably due to rare errors of data entry, there  
7 are unlikely extreme values in the dataset. Therefore, we excluded all subjects with registered  
8 extreme values on height (<150, >210 cm), weight (<40, >150 kg), or an extreme calculated value for  
9 BMI (<15, >60) (figure 1). The study was approved by the Ethical Review Board at Lund University  
10 and the manuscript was prepared according to the STROBE-statement.<sup>29</sup>

### 20 *Muscle strength*

21  
22 The men performed three tests of isometric muscle strength during conscription; hand grip, elbow  
23 flexion, and knee extension. At the start of test period in 1970, the tests were performed as  
24 previously described<sup>30</sup> and remained unchanged in general throughout the test period. In summary,  
25 hand grip strength on the preferred side was measured with 90° flexion at the elbow and the  
26 humerus in parallel to the torso. Knee extension was measured in a sitting position with 90° knee  
27 flexion and arms crossed over chest. The pelvis was fixed to the seat and a strap fastened above the  
28 lateral malleolus. Also, elbow flexion was measured in a sitting position with 90° flexion at the elbow  
29 and the humerus in parallel to the torso. A strap was fastened at the level of the radial styloid  
30 process.

31  
32 We calculated a measure of general muscle strength by standardizing and combining the three tests  
33 of muscle strength. To avoid bias due to change of testing procedure over time, we categorized the  
34 cohort into five subgroups based on period of conscription (1970-1973, 1974-1977, 1979-1984, 1986-  
35 1990, 1990-1994) and for each subcohort calculated the relative muscle strength. First, we  
36 standardized the three tests of muscle strength [standardized value= (value-mean)/standard  
37 deviation] within each subgroup and used the mean of the three test scores as a proxy for general  
38 muscle strength. Using percentiles, we then categorized the cohort into three groups of muscle  
39  
40  
41  
42  
43  
44  
45  
46  
47  
48  
49  
50  
51  
52  
53  
54  
55  
56  
57  
58  
59  
60

1  
2  
3 strength, where the 25<sup>th</sup> to 75<sup>th</sup> percentile defined the average category, the bottom 25<sup>th</sup> percentile  
4  
5 configured the low category, and the top 25<sup>th</sup> percentile defined the high muscle strength category.  
6  
7

### 8 **Survey of musculoskeletal pain**

9  
10 The Swedish Living Conditions Surveys (ULF) is a random population based survey conducted by  
11  
12 Statistics Sweden, previously used for research purposes.<sup>31-33</sup> For the present study, we used data  
13  
14 collected during a total of 10 years (1980, 1988, 1989, 1997-1999, 2002-2005). The surveys were  
15  
16 generally performed as interviews in person by trained interviewers, with a minority of the  
17  
18 interviews performed by phone. For men included in more than one survey, we used the last survey  
19  
20 without relevant study data missing.  
21

22  
23 At follow-up, the men were asked three questions regarding any current musculoskeletal pain: 1) Do  
24  
25 you have pain in neck or shoulders? 2) Do you have back-pain, hip-pain or sciatica? 3) Do you have  
26  
27 ache, pain in hands, elbows, legs or knees? For each type of complaint one of three answers was  
28  
29 possible: 1) Yes, severe 2) Yes, mild and 3) No. Our primary outcome was having reported either  
30  
31 severe or mild musculoskeletal pain, whereas our secondary outcomes we defined as follows: 1)  
32  
33 Having reported severe musculoskeletal pain 2) Having reported pain in back/hips 3) Having reported  
34  
35 pain in shoulders/neck 4) Having reported pain in arms/legs. From the surveys, we also included data  
36  
37 on self-reported current smoking status (yes/no), physical activity (practically none, now and then,  
38  
39 regularly, regularly strenuous), and level of education (compulsory school or less, secondary  
40  
41 education, higher education). Drop-outs from the survey, i.e. those who have declined participation,  
42  
43 cannot be individually identified. However, during the years of survey used in this study, the  
44  
45 participation rate in the survey among men in relevant age groups were 70.0-88.7%.  
46  
47  
48

### 49 **Statistical analyses**

50  
51  
52 All analyses were performed with SAS 9.3 (SAS Institute Inc). We used logistic binomial regression to  
53  
54 estimate relative risks (RR) and control potential confounders. In the multivariate model (primary  
55  
56 model), we included muscle strength, BMI, smoking status, physical activity and level of education.  
57  
58  
59  
60



### *Sensitivity analyses*

To test whether cardiovascular aspects of physical capacity confounded our results, we used physical work capacity measured as  $W_{\max 6}$  in a sensitivity analysis. For  $W_{\max 6}$ , the test result is an estimate of maximum work sustainable for 6 minutes<sup>34</sup> and is in young men correlated with maximum oxygen uptake ( $r=0.9$ ).<sup>35 36</sup> Acceptable data quality on work capacity was available in the subsample of men performing the baseline testing in 1976-1982. Out of all men in the cohort conscripted during the time period, 1154 men (74.6 %) completed an acceptable physical work capacity test on a bicycle ergometer (i.e. heart rate  $>174$  at the end of testing). We added the work capacity in relation to body weight as a continuous variable to the univariate model. Furthermore, we also performed two sensitivity analyses on the multivariate model with musculoskeletal pain as the dependent variable. In the first, we added test center to the model. For the second, to test whether our categorization of muscle strength influenced the results, we used the standardized muscle strength both as a continuous variable and as a categorical variable based on quintiles.

## Results

The mean time to follow-up was 17 years (table 1). Men with low muscle strength did not have an increased risk for the primary outcome "Musculoskeletal pain", but rather a statistically significant decreased risk (table 2). To summarize the observations of the secondary outcomes, we did not observe any statistically significant risk increases for neither men with a low nor high muscle strength. Compared to the crude model, the multivariate model produced similar risk estimates.

### *Sensitivity analyses*

Work capacity had a significant effect in the subsample analysis ( $p=0.03$ ) whereas it had only minor effect on the risk estimates for musculoskeletal pain, being 0.94 (95% confidence interval 0.82-1.08) and 1.02 (0.90-1.16) for low and high strength, respectively. The pattern of association in the secondary outcomes were in general somewhat strengthened when we adjusted for work capacity (data not shown). Using muscle strength as a continuous variable (hence assuming a linear relationship) did weaken the association with later musculoskeletal pain ( $p=0.23$ ). When we instead used quintiles to categorize muscle strength, we observed no increased risk for the group with lowest strength compared to average strength (RR=0.93, 0.85-1.01).

## Discussion

Investigating the general isometric muscle strength in adolescent men as a determinant of future musculoskeletal pain, we observed a decreased risk of self-reported musculoskeletal pain in men with low muscle strength. We also found a similar pattern, however not statistically significant, for "pain in back/hips" and "pain in neck/shoulders", whereas no association was found for future problems in arms/legs. Noticeably, the current study adds no support to a model in which low muscle strength in men is a risk factor for later musculoskeletal pain.

1  
2  
3 Using a historical cohort design with prospective registration of exposure and the outcome, the study  
4  
5 includes a large sample and thus allows better control for known confounders compared to previous  
6  
7 studies. All covariates (muscle strength, BMI, smoking, education, physical activity) included in the  
8  
9 multivariate model for musculoskeletal pain also had a significant association with the outcome.

10  
11 Furthermore, by investigating the effects of physical work capacity in a sensitivity analysis, we aimed  
12  
13 to isolate the direct effect of muscle strength from other aspects of physical capacity. However, the  
14  
15 study also has important limitations. First and foremost, we have used strength data from military  
16  
17 conscription testing. Although it provides a rich dataset from a structured environment, we do not  
18  
19 know how the subjects' motivation for military service may have biased the performance during the  
20  
21 testing procedure. However, assuming there is no association between motivation at conscription  
22  
23 testing and later risk of musculoskeletal pain (or the loss to follow-up) any bias would at most dilute  
24  
25 our result. Nevertheless, stronger recruits are more likely to be assigned to positions with heavy load  
26  
27 duty. Secondly, the conscription was mandatory for men only. As the pattern of physical activity and  
28  
29 occupational exposure differ between men and women, any generalization of the results to women  
30  
31 must be made with great caution. Third, the physical activity measurement consisted of a single  
32  
33 question and did neither allow calculation of metabolic equivalent of task (MET) nor included  
34  
35 occupational exposure. Also musculoskeletal pain is measured by questions that combine more than  
36  
37 one site, decreasing the precision. However, the categories are fairly well demarcated anatomically  
38  
39 save for the question regarding pain in arms/legs. Fourth, the covariates collected with  
40  
41 musculoskeletal pain at follow-up (smoking, physical activity, level of education) are cross-sectional  
42  
43 and might thus be mediators of reverse causation. However, the adjusted estimates are much in line  
44  
45 with the crude estimates.  
46  
47  
48  
49

50  
51 Primarily, we do not suggest that low muscle strength in youth is a protective factor for later  
52  
53 musculoskeletal pain. However, our observations could potentially be explained by both social and  
54  
55 biological factors. First, as former occupational exposure<sup>16</sup> and certain sport participation<sup>37</sup> are  
56  
57 established risk factors for future MSDs, it lends some evidence for a general model in which certain  
58  
59  
60

1  
2  
3 forms of physical activity is negative for the musculoskeletal health. It has also previously been  
4 suggested that there is a U-shaped association between physical activity and later back pain,<sup>38 39</sup> i.e  
5 that subjects with low and high levels of physical activity has an increased risk compared to the group  
6 with average activity. First, we speculate that our results may be explained by muscle strength in  
7 youth being one selection criterion for future high risk activities with a negative influence on the  
8 musculoskeletal health, e.g. higher risk of joint injury due to sports participation or manual repetitive  
9 work load. This would also include more immediate exposure in youth such as more physically  
10 demanding military service.<sup>40</sup> Although we have controlled for level of education, which we regard as  
11 a proxy for occupational exposure, there is potential for residual confounding. In other words,  
12 individuals with low general muscle strength might to a certain degree be deselected for high risk  
13 activities compared to stronger men.. A second potential explanation for our observation can be  
14 based on that, the strength of an individual is associated with the muscle fiber type distribution,  
15 which have a large genetic component.<sup>41</sup> Whereas type I fibers are more common in endurance  
16 athletes<sup>42</sup>, a high type II percentage have been reported to be associated with both isometric muscle  
17 strength<sup>43</sup> as well as low back pain.<sup>44</sup>

18  
19  
20  
21  
22  
23  
24  
25  
26  
27  
28  
29  
30  
31  
32  
33  
34  
35  
36 It is important to note that our main result are not the significantly decreased risk of later  
37 musculoskeletal pain observed in men with low strength but the nonexistent risk increase in the  
38 same group. This is partly in contrast with one of the few previous studies in the area. Although we in  
39 the present study only include measurements of isometric strength, the previous study<sup>25</sup> reported  
40 associations with both an isometric strength measure (static two hand lift) and an isotonic strength  
41 measure (bench press). In another study on the same cohort, it is reported that the result in bench  
42 press, but not two hand lift, was associated with both future cardiovascular fitness and future  
43 physical activity,<sup>45</sup> potentially explaining part of the difference. Another study reported flexibility as a  
44 sit and reach test,<sup>24</sup> but not strength measured as sit-ups, to be negatively associated with future risk  
45 of back pain. Hence, it is possible that other aspects of muscular and musculoskeletal function is of  
46 greater importance of future risk of MSDs than the isometric muscle strength as such.

1  
2  
3 The association between muscle strength and later musculoskeletal pain diminished when we used  
4 muscle strength as a continuous variable. This was not surprising, as the observed association was  
5 non linear in the primary model. It is to be expected that the test offices differ somewhat in their  
6 reported test results, as they were assigned adolescents based on geography. However, including  
7 test offices in the model did not have any effect on the overall association. When we included work  
8 capacity in the model, most risk estimates decreased in absolute values, furthering strengthening the  
9 observations in the primary model. By using the relative muscle strength during testing periods of  
10 five years, we partially address the potential systematic change in testing procedure over the years.  
11 Although the methods of measurements have not changed at large, minor adjustments cannot be  
12 excluded.  
13  
14  
15  
16  
17  
18  
19  
20  
21  
22  
23  
24

25 In future studies, it would be of interest to investigate if low muscle strength serves as a deselection  
26 criterion for professions or types of leisure time physical activity with higher risk of acute injuries or  
27 chronic physical overload, factors with negative impact on musculoskeletal health.. Since the physical  
28 activity pattern and physical fitness profiles differ between men and women, further investigations  
29 are also needed to investigate if similar associations can be found in women.  
30  
31  
32  
33  
34  
35  
36

37 In conclusion, we observed no increased risk of self-reported musculoskeletal pain in adult men with  
38 low overall isometric muscle strength in youth. Thus, this study add no support to a model in which  
39 muscle strength is a risk factor for future musculoskeletal pain in men.  
40  
41  
42  
43

## 44 **Acknowledgements**

45  
46  
47 No author has a conflict of interest to report. The authors would like to thank Charlotte Bergknut for  
48 the initial data management.  
49  
50  
51

## 52 **Funding**

1  
2  
3 The authors are supported by grants from The Swedish Research Council, Skåne Regional Council,  
4 and the Faculty of Medicine at Lund University. The funders neither influenced the study process nor  
5  
6  
7 manuscript preparation.  
8  
9

### 10 **Author contributions**

11  
12  
13  
14 ST proposed the study idea, collected data, designed the study, and drafted the manuscript. IP  
15  
16 designed the study and provided input during manuscript preparation. CZ designed the study and  
17  
18 performed the statistical analyses. ME designed the study, collected data, and provided input during  
19  
20 manuscript preparation. All authors approved the final version of the manuscript.  
21  
22

### 23 **Data sharing statement**

24  
25  
26  
27 No additional data available.  
28  
29

### 30 **Funding**

31  
32  
33  
34 None  
35  
36

### 37 **Competing Interests**

38  
39  
40  
41 None  
42  
43  
44  
45  
46  
47  
48  
49  
50  
51  
52  
53  
54  
55  
56  
57  
58  
59  
60

## References

1. Bergman S, Herrstrom P, Hogstrom K, et al. Chronic musculoskeletal pain, prevalence rates, and sociodemographic associations in a Swedish population study. *J Rheumatol* 2001;28(6):1369-77.
2. Picavet HS, Schouten JS. Musculoskeletal pain in the Netherlands: prevalences, consequences and risk groups, the DMC(3)-study. *Pain* 2003;102(1-2):167-78.
3. Urwin M, Symmons D, Allison T, et al. Estimating the burden of musculoskeletal disorders in the community: the comparative prevalence of symptoms at different anatomical sites, and the relation to social deprivation. *Ann Rheum Dis* 1998;57(11):649-55.
4. Murray CJ, Vos T, Lozano R, et al. Disability-adjusted life years (DALYs) for 291 diseases and injuries in 21 regions, 1990-2010: a systematic analysis for the Global Burden of Disease Study 2010. *Lancet* 2013;380(9859):2197-223.
5. van der Windt DA, Thomas E, Pope DP, et al. Occupational risk factors for shoulder pain: a systematic review. *Occup Environ Med* 2000;57(7):433-42.
6. Hoogendoorn WE, van Poppel MN, Bongers PM, et al. Physical load during work and leisure time as risk factors for back pain. *Scand J Work Environ Health* 1999;25(5):387-403.
7. Felson DT, Zhang Y, Hannan MT, et al. Risk factors for incident radiographic knee osteoarthritis in the elderly: the Framingham Study. *Arthritis Rheum* 1997;40(4):728-33.
8. Shiri R, Karppinen J, Leino-Arjas P, et al. The association between obesity and low back pain: a meta-analysis. *Am J Epidemiol* 2010;171(2):135-54.
9. Grotle M, Hagen KB, Natvig B, et al. Obesity and osteoarthritis in knee, hip and/or hand: an epidemiological study in the general population with 10 years follow-up. *BMC Musculoskeletal Disord* 2008;9:132.

- 1  
2  
3 10. Hagen K, Zwart JA, Svebak S, et al. Low socioeconomic status is associated with chronic  
4  
5 musculoskeletal complaints among 46,901 adults in Norway. *Scand J Public Health*  
6  
7 2005;33(4):268-75.  
8
- 9  
10 11. Dalstra JA, Kunst AE, Borrell C, et al. Socioeconomic differences in the prevalence of common  
11  
12 chronic diseases: an overview of eight European countries. *Int J Epidemiol* 2005;34(2):316-26.  
13
- 14 12. Bengtsson C, Nordmark B, Klareskog L, et al. Socioeconomic status and the risk of developing  
15  
16 rheumatoid arthritis: results from the Swedish EIRA study. *Ann Rheum Dis* 2005;64(11):1588-  
17  
18 94.  
19
- 20 13. Palmer KT, Syddall H, Cooper C, et al. Smoking and musculoskeletal disorders: findings from a  
21  
22 British national survey. *Ann Rheum Dis* 2003;62(1):33-6.  
23
- 24 14. Holth HS, Werpen HK, Zwart JA, et al. Physical inactivity is associated with chronic  
25  
26 musculoskeletal complaints 11 years later: results from the Nord-Trøndelag Health Study.  
27  
28 *BMC Musculoskelet Disord* 2008;9:159.  
29
- 30 15. McBeth J, Jones K. Epidemiology of chronic musculoskeletal pain. *Best Pract Res Clin Rheumatol*  
31  
32 2007;21(3):403-25.  
33
- 34 16. Roquelaure Y, Ha C, Rouillon C, et al. Risk factors for upper-extremity musculoskeletal disorders in  
35  
36 the working population. *Arthritis Rheum* 2009;61(10):1425-34.  
37
- 38 17. Hakkinen A, Sokka T, Kotaniemi A, et al. A randomized two-year study of the effects of dynamic  
39  
40 strength training on muscle strength, disease activity, functional capacity, and bone mineral  
41  
42 density in early rheumatoid arthritis. *Arthritis Rheum* 2001;44(3):515-22.  
43
- 44 18. Baker KR, Nelson ME, Felson DT, et al. The efficacy of home based progressive strength training in  
45  
46 older adults with knee osteoarthritis: a randomized controlled trial. *J Rheumatol*  
47  
48 2001;28(7):1655-65.  
49
- 50 19. Hamberg-van Reenen HH, Ariens GA, Blatter BM, et al. A systematic review of the relation  
51  
52 between physical capacity and future low back and neck/shoulder pain. *Pain* 2007;130(1-  
53  
54 2):93-107.  
55  
56  
57  
58  
59  
60



- 1  
2  
3 20. Leino P, Aro S, Hasan J. Trunk muscle function and low back disorders: a ten-year follow-up study.  
4  
5 *J Chronic Dis* 1987;40(4):289-96.  
6  
7 21. Kujala UM, Taimela S, Viljanen T, et al. Physical loading and performance as predictors of back  
8  
9 pain in healthy adults. A 5-year prospective study. *Eur J Appl Physiol Occup Physiol*  
10  
11 1996;73(5):452-8.  
12  
13 22. Faber A, Sell L, Hansen JV, et al. Does muscle strength predict future musculoskeletal disorders  
14  
15 and sickness absence? *Occupational medicine (Oxford, England)* 2012;62(1):41-6.  
16  
17 23. Ruiz JR, Castro-Pinero J, Artero EG, et al. Predictive validity of health-related fitness in youth: a  
18  
19 systematic review. *Br J Sports Med* 2009;43(12):909-23.  
20  
21 24. Mikkelsen LO, Nupponen H, Kaprio J, et al. Adolescent flexibility, endurance strength, and  
22  
23 physical activity as predictors of adult tension neck, low back pain, and knee injury: a 25 year  
24  
25 follow up study. *Br J Sports Med* 2006;40(2):107-13.  
26  
27 25. Barnekow-Bergkvist M, Hedberg GE, Janlert U, et al. Determinants of self-reported neck-shoulder  
28  
29 and low back symptoms in a general population. *Spine (Phila Pa 1976)* 1998;23(2):235-43.  
30  
31 26. Neovius M, Sundstrom J, Rasmussen F. Combined effects of overweight and smoking in late  
32  
33 adolescence on subsequent mortality: nationwide cohort study. *BMJ* 2009;338:b496.  
34  
35 27. Nilsson PM, Nyberg P, Ostergren PO. Increased susceptibility to stress at a psychological  
36  
37 assessment of stress tolerance is associated with impaired fetal growth. *Int J Epidemiol*  
38  
39 2001;30(1):75-80.  
40  
41 28. Hemmingsson T, Melin B, Allebeck P, et al. The association between cognitive ability measured at  
42  
43 ages 18-20 and mortality during 30 years of follow-up--a prospective observational study  
44  
45 among Swedish males born 1949-51. *Int J Epidemiol* 2006;35(3):665-70.  
46  
47 29. von Elm E, Altman DG, Egger M, et al. Strengthening the Reporting of Observational Studies in  
48  
49 Epidemiology (STROBE) statement: guidelines for reporting observational studies. *BMJ*  
50  
51 2007;335(7624):806-8.  
52  
53  
54  
55  
56  
57  
58  
59  
60

- 1  
2  
3 30. Nordesjo LO, Schéle R. Validity of Ergometer Cycle Test and Measures of Isometric Muscle  
4 Strength when Predicting some Aspects of Military Performance. *Swedish J Defence Med*  
5 1974(10):11-23.  
6  
7  
8  
9 31. Wolk A, Rossner S. Effects of smoking and physical activity on body weight: developments in  
10 Sweden between 1980 and 1989. *J Intern Med* 1995;237(3):287-91.  
11  
12 32. Sundquist J, Johansson SE. The influence of socioeconomic status, ethnicity and lifestyle on body  
13 mass index in a longitudinal study. *Int J Epidemiol* 1998;27(1):57-63.  
14  
15 33. Bygren LO, Konlaan BB, Johansson SE. Attendance at cultural events, reading books or  
16 periodicals, and making music or singing in a choir as determinants for survival: Swedish  
17 interview survey of living conditions. *BMJ* 1996;313(7072):1577-80.  
18  
19 34. Tornvall G. Assessment of physical capabilities. *Acta physiologica Scandinavica* 1963;58(Suppl  
20 201):1-102.  
21  
22 35. Nordesjo LO. A comparison between the Thornvall maximal ergometer test, submaximal  
23 ergometer tests and maximal oxygen uptake. *Swedish J Defence Med* 1974(10):3-10.  
24  
25 36. Nordesjo LO. Estimation of the maximal work rate sustainable for 6 minutes using a single-level  
26 load or stepwise increasing loads. *Ups J Med Sci* 1974;79(1):45-50.  
27  
28 37. Heneweer H, Picavet HS, Staes F, et al. Physical fitness, rather than self-reported physical  
29 activities, is more strongly associated with low back pain: evidence from a working  
30 population. *Eur Spine J* 2012;21(7):1265-72.  
31  
32 38. Kujala UM, Kettunen J, Paananen H, et al. Knee osteoarthritis in former runners, soccer players,  
33 weight lifters, and shooters. *Arthritis Rheum* 1995;38(4):539-46.  
34  
35 39. Heneweer H, Vanhees L, Picavet HS. Physical activity and low back pain: a U-shaped relation?  
36 *Pain* 2009;143(1-2):21-5.  
37  
38 40. Almeida SA, Williams KM, Shaffer RA, et al. Epidemiological patterns of musculoskeletal injuries  
39 and physical training. *Med Sci Sports Exerc* 1999;31(8):1176-82.  
40  
41  
42  
43  
44  
45  
46  
47  
48  
49  
50  
51  
52  
53  
54  
55  
56  
57  
58  
59  
60

- 1  
2  
3 41. Simoneau JA, Bouchard C. Genetic determinism of fiber type proportion in human skeletal  
4 muscle. *FASEB J* 1995;9(11):1091-5.  
5  
6  
7 42. Costill DL, Daniels J, Evans W, et al. Skeletal muscle enzymes and fiber composition in male and  
8 female track athletes. *J Appl Physiol* 1976;40(2):149-54.  
9  
10  
11 43. Tesch P, Karlsson J. Isometric strength performance and muscle fibre type distribution in man.  
12 *Acta physiologica Scandinavica* 1978;103(1):47-51.  
13  
14  
15 44. Mannion AF, Weber BR, Dvorak J, et al. Fibre type characteristics of the lumbar paraspinal  
16 muscles in normal healthy subjects and in patients with low back pain. *J Orthop Res*  
17 1997;15(6):881-7.  
18  
19  
20 45. Barnekow-Bergkvist M, Hedberg G, Janlert U, et al. Prediction of physical fitness and physical  
21 activity level in adulthood by physical performance and physical activity in adolescence--an  
22 18-year follow-up study. *Scand J Med Sci Sports* 1998;8(5 Pt 1):299-308.  
23  
24  
25  
26  
27  
28  
29  
30  
31  
32  
33  
34  
35

## 36 Tables and Figures

37  
38 **Table 1:** Description of study sample

39  
40 **Table 2:** Risk estimates for the muscle strength in youth as a determinant of self-reported  
41 musculoskeletal pain in adulthood  
42  
43

44  
45 **Figure 1:** The identification of the study sample and the loss to follow-up  
46  
47  
48  
49  
50  
51  
52  
53  
54  
55  
56  
57  
58  
59  
60

Table 1 Description of study sample

|                                           |                        |
|-------------------------------------------|------------------------|
| <b>Number of men</b>                      | 5489                   |
| <b>Mean age at baseline (SD)</b>          | 18.2 (0.5)             |
| <b>Mean time to follow-up (SD, range)</b> | 17.2 years (8.4, 1-35) |
| <b>Mean hand grip* (SD)</b>               | 617 (98)               |
| <b>Mean elbow flexion* (SD)</b>           | 385 (83)               |
| <b>Mean knee extension* (SD)</b>          | 567 (116)              |
| <b>Muscle Strength (%)</b>                |                        |
| Low                                       | 1371 (25.0)            |
| Average                                   | 2747 (50.0)            |
| High                                      | 1371 (25.0)            |
| <b>BMI (%)</b>                            |                        |
| <18.5                                     | 477 (8.7)              |
| 18.5-24.9                                 | 4498 (81.9)            |
| 25-29.9                                   | 448 (8.2)              |
| >30                                       | 66 (1.2)               |
| <b>Type of interview (%)</b>              |                        |
| In person                                 | 4349 (79.2)            |
| By telephone                              | 1140 (20.8)            |
| <b>Pain in back/hips (%)</b>              |                        |
| Yes                                       | 1645 (30.0)            |
| of which severe                           | 321 (5.8)              |
| No                                        | 3842 (70.0)            |
| Missing                                   | 2 (0.0)                |
| <b>Pain in neck/shoulders (%)</b>         |                        |
| Yes                                       | 1562 (28.5)            |
| of which severe                           | 246 (4.5)              |
| No                                        | 3925 (71.5)            |
| Missing                                   | 2 (0.0)                |
| <b>Pain in arms/legs (%)</b>              |                        |
| Yes                                       | 1243 (22.6)            |
| of which severe                           | 196 (3.6)              |
| No                                        | 4243 (77.3)            |
| Missing                                   | 3 (0.0)                |
| <b>Pain, independent of location (%)</b>  |                        |
| Yes                                       | 2847 (51.9)            |
| of which severe                           | 576 (10.5)             |
| No                                        | 2639 (48.1)            |
| Missing                                   | 3 (0.0)                |
| <b>Smoking status (%)</b>                 |                        |
| Yes                                       | 827 (15.1)             |
| No                                        | 4662 (84.9)            |
| <b>Level of education (%)</b>             |                        |
| Compulsory                                | 589 (10.7)             |
| Secondary                                 | 2889 (52.6)            |
| Higher                                    | 2011 (36.6)            |
| <b>Physical Activity (%)</b>              |                        |
| Practically non                           | 583 (10.6)             |
| Now and then                              | 1613 (29.4)            |
| Regularly                                 | 2077 (37.8)            |
| Regularly strenuous                       | 1216 (22.2)            |

\* In Newton.

**Table 2** Risk estimates for the muscle strength in youth as a determinant of self-reported musculoskeletal pain in adulthood

| Outcomes                    | Models                        |                                   |                         |                                              |                     |
|-----------------------------|-------------------------------|-----------------------------------|-------------------------|----------------------------------------------|---------------------|
|                             | Univariate<br>Muscle strength |                                   |                         | Multivariate <sup>a</sup><br>Muscle strength |                     |
|                             | Low (N=1371)<br>RR (N)        | Average (N=2747)<br>Reference (N) | High (N=1371)<br>RR (N) | Low<br>RR (95% CI)                           | High<br>RR (95% CI) |
| Musculoskeletal pain        | 0.92 (668)                    | 1 (1457)                          | 0.99 (722)              | 0.93 (0.87-0.99)                             | 0.99 (0.93-1.05)    |
| Severe musculoskeletal pain | 0.96 (135)                    | 1 (283)                           | 1.12 (158)              | 0.96 (0.79-1.18)                             | 1.07 (0.89-1.29)    |
| Pain in back/hips           | 0.92 (384)                    | 1 (832)                           | 1.03 (429)              | 0.93 (0.84-1.03)                             | 1.03 (0.94-1.13)    |
| Pain in neck/shoulders      | 0.92 (366)                    | 1 (799)                           | 0.99 (397)              | 0.93 (0.83-1.03)                             | 1.00 (0.90-1.10)    |
| Pain in arms/legs           | 0.97 (297)                    | 1 (616)                           | 1.07 (330)              | 0.97 (0.86-1.10)                             | 1.06 (0.94-1.19)    |

N= Number of cases

RR= Relative risk estimates

CI= Confidence interval

a= adjusted for smoking status, physical activity, education, body mass index

1  
2  
3  
4  
5  
6  
7  
8  
9  
10  
11  
12  
13  
14  
15  
16

# Muscle Strength in Adolescent Men and Future Musculoskeletal Pain:

## A Cohort Study with 17 Years of Follow-up

17  
18  
19  
20  
21  
22  
23  
24  
25  
26  
27  
28  
29  
30  
31  
32  
33  
34  
35  
36  
37  
38  
39  
40  
41  
42  
43  
44  
45  
46  
47  
48  
49  
50  
51  
52  
53  
54  
55  
56  
57  
58  
59  
60

Simon Timpka<sup>1</sup>, Ingemar F Petersson<sup>1</sup>, Caddie Zhou<sup>1</sup>, Martin Englund<sup>1, 2</sup>

1 Department of Orthopedics, Clinical Sciences Lund, Lund University, Lund, Sweden

2 Clinical Epidemiology Research & Training Unit, Boston University School of Medicine, Boston,  
Massachusetts, United States of America

Corresponding author:

Simon Timpka  
Skånes universitetssjukhus  
Epi-centrum Skåne  
Medicon Village  
223 81 Lund  
Sweden

Phone: +46 738 395 276

Mail: [simon.timpka@med.lu.se](mailto:simon.timpka@med.lu.se)

Words in main text: 2868

Number of figures: 1

Number of tables: 2

## Abstract

### Objectives

Musculoskeletal pain is highly prevalent throughout adulthood with a major impact on health, function and participation in the society. Still, the association between muscle strength and development of musculoskeletal pain is unclear. We aimed to study whether overall muscle strength in adolescent men is associated with self-reported musculoskeletal pain in adulthood.

### Design

Cohort study with baseline data from the Swedish Conscription Register and outcome information from the random population-based Swedish Living Conditions Surveys.

### Setting

Sweden, 1970-2005.

### Participants

We studied 5489 men who at age 17-19 years tested their isometric muscle strength (hand grip, arm flexion, knee extension) during the compulsory conscription.

### Outcome measures

The men were surveyed regarding self-reported musculoskeletal pain; mean follow-up time of 17 (range 1-35) years. Our primary outcome was a self-report of musculoskeletal pain, and secondary outcomes were a report of "severe pain", "pain in back/hips", "pain in neck/shoulders", or "pain in arms/legs", respectively. We categorized muscle strength into three groups; low, average, and high using the 25th to 75th percentile to define the reference category (average). We estimated relative risks using log binomial regression with adjustment for smoking, body mass index, education, and physical activity.

## Results

In the adjusted model, men with low overall muscle strength had decreased risk of self-reported musculoskeletal pain (0.93, 95% confidence interval 0.87-0.99). We observed no such association in men with high strength (0.99, 0.93-1.05). Furthermore, no statistically significant increase or decrease in risk was observed for any of the secondary outcomes.

## Conclusion

In men, low overall isometric muscle strength in youth was not associated with an increased risk of future musculoskeletal pain. Contrarily, we observed a slightly decreased risk of self-reported

musculoskeletal pain in adulthood. Our results does not support a model in which low muscle strength is a risk factor for future musculoskeletal pain. Residual confounding by adult occupational exposures, leisure time physical activity level and psychosocial factors may have impacted on results.



## Article summary

### Article focus

- We aimed to study whether overall muscle strength in youth is inversely associated with the development of musculoskeletal pain in adulthood.

### Key messages

- In contradiction to our expectations, we observed a decreased risk of self-reported musculoskeletal pain in adult men with low overall isometric muscle strength in youth.
- The study does not provide evidence in support of a theoretical model in which low muscle strength in young men is associated with an increased risk of musculoskeletal pain later in life.
- ~~We speculate that low muscle strength may serve as a deselection criterion for activities with high risk of acute injuries or chronic physical overload, factors with negative impact on musculoskeletal health.~~

### Strengths and limitations of study

- The main strengths of the study are a large sample, the independent evaluation of exposure and outcome, the combined use of three different measures of muscle strength, and the comparably long time to follow-up.
- The main limitations of the study are the following; the cohort does not include women, musculoskeletal pain only identified with one question per site, the motivation for military service might influence ~~measurement~~ performance in-of muscle strength testing, and the potential for unmeasured or residual confounding.

## Introduction

Musculoskeletal disorders (MSDs), such as low back pain, osteoarthritis, and widespread pain, are highly prevalent in the adult population.<sup>1-3</sup> MSDs also contribute to a substantial burden of disease at middle and older ages.<sup>4</sup> Although pain emanating from the musculoskeletal system might be attributed to a wide range of diseases with diverse causal chains, many MSDs have common risk factors such as heavy occupational work load,<sup>5,6</sup> a high body mass index (BMI),<sup>7-9</sup> and a low socio-economy.<sup>10-12</sup> Although smoking in some studies have been identified as a risk factor for certain MSDs,<sup>13,14</sup> its main effect on musculoskeletal pain might be as an effect modifier of the pain sensation.<sup>15</sup> As physical work load is a risk factor for many MSDs,<sup>16</sup> a model in which the muscle strength in the loaded parts of the body are protective for future disorders is appealing. This is also the main rationale of studies in the area; does general or demarcated muscle strength have a protective effect on future complaints in the adjacent structures? Furthermore, it is also known that physical exercise with focus on muscle strength is an important secondary and tertiary prevention of MSDs.<sup>17,18</sup> A handful of studies have hitherto ~~longitudinally~~ investigated the strength of isolated muscle groups as a determinant of later MSDs in adulthood ~~as a determinant of later MSDs.~~<sup>19-22</sup> However, ~~in adult subjects,~~ there is ~~for the time being~~ conflicting evidence of the value of muscle strength as a protective factor of musculoskeletal pain, such as neck/shoulder pain and low back pain in adult subjects.<sup>19</sup> When considering muscle strength in youth as a potential risk factor in the longer perspective, relatively little is known about its the association with of muscle strength in youth and later disease of any kind is relatively unknown, including musculoskeletal pain.<sup>23</sup> ~~At least Ft~~ two studies have investigated the result of single muscle strength tests as determinants of musculoskeletal complaints decades later.<sup>24,25</sup> ~~The first study,~~ using number of sit-ups during 30 seconds as a strength measure, found no association with later low back pain or tension neck in men. In women however, the high strength group had a decreased odds ratio (OR) of tension neck.<sup>24</sup> The second study found a

1  
2  
3 decreased OR for MSDs in men who either had a strong performance in isotonic bench press or in a  
4  
5 isometric two hand lift test.<sup>25</sup> Neither of the two studies includes a measure of overall muscular  
6  
7 capacity. Hence, although there is some evidence of an association between low muscle strength in  
8  
9 youth and later risk of MSDs, the association between overall muscle strength in adolescence and  
10  
11 later musculoskeletal pain has never been studied. Furthermore, with a larger sample size, data  
12  
13 on common risk factors, testing of three different muscle groups, and data on physical work capacity,  
14  
15 we also address some of the limitations of earlier studies.

16  
17  
18 Our aim in this study was to investigate the general muscle strength in adolescent males as a  
19  
20 determinant of later self-reported musculoskeletal pain. We hypothesized that low general muscle  
21  
22 strength in youth is associated with an increased risk of having musculoskeletal pain in adulthood.  
23  
24

## 25 26 **Methods**

27  
28  
29 For this prospective register-based cohort study, we used two main inclusion criteria to identify the  
30  
31 study sample. First, when typically aged 18, the subjects should have performed mandatory  
32  
33 conscription testing in Sweden between 1970-1994, with the exception of the years 1978 and 1985.  
34  
35 Second, they should have been included in the Swedish Living Conditions Surveys any year between  
36  
37 1980 and 2005 when questions regarding musculoskeletal problems, smoking status, and physical  
38  
39 activity were simultaneously included.  
40  
41

42  
43 We excluded all men who were surveyed prior to the baseline testing or were younger than 17 years  
44  
45 or older than 19 years at baseline (Table 1). We also excluded men with an existing musculoskeletal  
46  
47 disorder (Diseases of the musculoskeletal system and connective tissue according to the  
48  
49 International classification of disease version 8 or 9) and those who had missing data on variables  
50  
51 included in the primary model (muscle strength, smoking, BMI, physical activity, level of education).  
52  
53

54  
55 In the final study sample we included 5489 men (figure 1). The Swedish conscription register is well  
56  
57 characterized and has been used for research purposes previously. Data from the Swedish  
58  
59  
60

1  
2  
3  
4  
5  
6  
7  
8  
9  
10  
11  
12  
13  
14  
15  
16  
17  
18  
19  
20  
21  
22  
23  
24  
25  
26  
27  
28  
29  
30  
31  
32  
33  
34  
35  
36  
37  
38  
39  
40  
41  
42  
43  
44  
45  
46  
47  
48  
49  
50  
51  
52  
53  
54  
55  
56  
57  
58  
59  
60

scription testing has been previously used for research purposes.<sup>26-28</sup> During the period At the  
time of ~~the~~ study sample testing, conscription was mandatory by law for all Swedish men. Specially  
trained employees at six regional conscription offices administrated the conscription tests during a  
two-day session. The procedure that also included separate evaluations by a medical doctor and a  
psychologist. Only men with serious health complaints, were excused from conscription. The  
procedure included measurements of each mansubject's weight in underwear to the kilogram and  
height without shoes to the centimeter. Using height and weight, we calculated BMI as height/kg<sup>2</sup>.  
Probably due to rare errors of data entry, there are unlikely extreme values in the dataset. Therefore,  
we excluded all subjects with registered extreme values on height (<150, >210 cm), weight (<40,  
>150 kg), or an extreme calculated value for BMI (<15, >60) (figure 1). The study was approved by  
the Ethical Review Board at Lund University and the manuscript was prepared according to the  
STROBE-statement.<sup>29</sup>

### *Muscle strength*

The men performed three tests of isometric muscle strength during conscription; hand grip, elbow  
flexion, and knee extension. At the start of test period in 1970, the tests were performed as  
previously described<sup>30</sup> and remained unchanged in general throughout the test period. In summary,  
hand grip strength on the preferred side was measured with 90° flexion at the elbow and the  
humerus in parallel to the torso. Knee extension was measured in a sitting position with 90° knee  
flexion and arms crossed over chest. The pelvis was fixed to the seat and a strap fastened above the  
lateral malleolus. Also, elbow flexion was measured in a sitting position with 90° flexion at the elbow  
and the humerus in parallel to the torso. A strap was fastened at the level of the radial styloid  
process.

We calculated a measure of general muscle strength by standardizing and combining the three tests  
of muscle strength. To avoid bias due to change of testing procedure over time, we categorized the  
cohort into five subgroups based on period of conscription (1970-1973, 1974-1977, 1979-1984, 1986-  
1990, 1990-1994) and for each subcohort calculated the relative muscle strength. First, ~~We~~

1  
2  
3 standardized the three tests of muscle strength [standardized value= (value–mean)/standard  
4 deviation] within each subgroup and used the mean of the three test scores as a proxy for general  
5 muscle strength. Using percentiles, we then categorized the cohort into three groups of muscle  
6 strength, where the 25<sup>th</sup> to 75<sup>th</sup> percentile defined the average category, the bottom 25<sup>th</sup> percentile  
7 configured the low category, and the top 25<sup>th</sup> percentile defined the high muscle strength category.  
8  
9  
10  
11  
12

### 13 **Survey of musculoskeletal pain**

14  
15  
16 The Swedish Living Conditions Surveys (ULF) is a random population based survey conducted by  
17 Statistics Sweden, previously used for research purposes.<sup>31-33</sup> For the present study, we used data  
18 collected during a total of 10 years (1980, 1988, 1989, 1997-1999, 2002-2005). The surveys were  
19 generally performed as interviews in person by trained interviewers, with a minority of the  
20 interviews performed by phone. For men included in more than one survey, we used the last survey  
21 without relevant study data missing.  
22  
23  
24  
25  
26  
27  
28

29 At follow-up, the men were asked three questions regarding any current musculoskeletal pain: 1) Do  
30 you have pain in neck or shoulders? 2) Do you have back-pain, hip-pain or sciatica? 3) Do you have  
31 ache, pain in hands, elbows, legs or knees? For each type of complaint one of three answers was  
32 possible: 1) Yes, severe 2) Yes, mild and 3) No. Our primary outcome was having reported either  
33 severe or mild musculoskeletal pain, whereas our secondary outcomes we defined as follows: 1)  
34 Having reported severe musculoskeletal pain 2) Having reported pain in back/hips 3) Having reported  
35 pain in shoulders/neck 4) Having reported pain in arms/legs. From the surveys, we also included data  
36 on self-reported current smoking status (yes/no), physical activity (practically none, now and then,  
37 regularly, regularly strenuous), and level of education (compulsory school or less, secondary  
38 education, higher education). Drop-outs from the survey, i.e. those who have declined participation,  
39 cannot be individually identified. However, during the years of survey used in this study, the  
40 participation rate in the survey among men in relevant age groups were 70.0-88.7%.  
41  
42  
43  
44  
45  
46  
47  
48  
49  
50  
51  
52  
53  
54  
55  
56  
57  
58  
59  
60

## Statistical analyses

All analyses were performed with SAS 9.3 (SAS Institute Inc). We used logistic binomial regression to estimate relative risks (RR) and control potential confounders. In the multivariate model (primary model), we included muscle strength, BMI, smoking status, physical activity and level of education.

### *Sensitivity analyses*

To test whether cardiovascular aspects of physical capacity confounded our results, we used physical work capacity measured as  $W_{\max-6\text{-min}}$  in a sensitivity analysis. For  $W_{\max-6\text{-min}}$ , the test result is an estimate of maximum work sustainable for 6 minutes<sup>34</sup> and is in young men correlated with maximum oxygen uptake ( $r=0.9$ ).<sup>35 36</sup> Acceptable data quality on work capacity was available in the subsample of men performing the baseline testing in 1976-1982. Out of all men in the cohort conscripted during the time period, 1154 men (74.6 %) completed an acceptable physical work capacity test on a bicycle ergometer (i.e. heart rate  $>174$  at the end of testing). We added the work capacity in relation to body weight as a continuous variable to the univariate model. Furthermore, we also performed two sensitivity analyses on the multivariate model with musculoskeletal pain as the dependent variable. In the first, we added test center to the model. For the second, to test whether our categorization of muscle strength influenced the results, we ~~1) treated~~ used the standardized muscle strength both as a continuous variable and 2) treated the standardized muscle strength as a categorical variable based on quintiles.

## Results

The mean time to follow-up was 17 years (table 1). Men with low muscle strength did not have an increased risk ~~for the primary outcome "Musculoskeletal pain"~~, but rather a statistically significant decreased risk, ~~for the primary outcome "Musculoskeletal pain"~~ (table 2). To summarize the observations of the secondary outcomes, we did not observe any statistically significant risk increases for neither men with a low nor high muscle strength. Compared to the crude model, the multivariate model produced similar risk estimates.

### *Sensitivity analyses*

Work capacity had a significant effect in the subsample analysis ( $p=0.03$ ) whereas it had only minor effect on the risk estimates for musculoskeletal pain, being 0.94 (95% confidence interval 0.82-1.08) and 1.02 (0.90-1.16) for low and high strength, respectively. The pattern of association in the secondary outcomes were in general somewhat strengthened when we adjusted for work capacity (data not shown). Using muscle strength as a continuous variable (hence assuming a linear relationship) did weaken the association with later musculoskeletal pain ( $p=0.23$ ). When we instead used quintiles to categorize muscle strength, we observed no increased risk for the group with lowest strength compared to average strength (RR=0.93, 0.85-1.01).

## Discussion

Investigating the ~~general overall~~ isometric muscle strength in adolescent men as a determinant of future musculoskeletal pain, we observed a decreased risk of self-reported musculoskeletal pain in men with low muscle strength. ~~No such association was observed for men with high strength.~~ We also found a similar pattern, however not statistically significant, ~~pattern~~ for "pain in back/hips" and "pain in neck/shoulders", whereas no association was found for future problems in arms/legs.

Noticeably, the current study adds no support to a model in which low muscle strength in men is a

1  
2  
3 risk factor for later musculoskeletal pain. ~~the observed associations were in contradiction to our~~  
4  
5 ~~expectations.~~  
6  
7

8 Using a historical cohort design with prospective registration of exposure and the outcome, ~~the~~  
9  
10 study includes a large sample and thus allows better control for known confounders compared to  
11  
12 previous studies. All covariates (muscle strength, BMI, smoking, education, physical activity) included  
13  
14 in the multivariate model for musculoskeletal pain also had a significant association with the  
15  
16 outcome. Furthermore, by investigating the effects of controlling for physical work capacity in a  
17  
18 sensitivity analysis, we aimed to isolate the direct effect of muscle strength from other aspects of  
19  
20 physical capacity. However, the study also has important limitations. First and foremost, we have  
21  
22 used strength data from military conscription testing. Although it provides a rich dataset from a  
23  
24 structured environment, we do not know how the subject's<sup>1</sup> motivation for military service may have  
25  
26 biased the performance during the testing procedure. However, assuming there is no association  
27  
28 between motivation at conscription testing and later risk of musculoskeletal pain (or the loss to  
29  
30 follow-up) any bias would at most dilute our result. Nevertheless, stronger recruits are more likely to  
31  
32 be assigned to positions with heavy load duty. Secondly, the conscription was mandatory for men  
33  
34 only. As the pattern of physical activity and occupational exposure differ between men and women,  
35  
36 any generalization of the results to women must be made with great caution. Third, the physical  
37  
38 activity measurement consisted of a single question and did neither allow calculation of metabolic  
39  
40 equivalent of task (MET) nor included occupational exposure. Also musculoskeletal pain is measured  
41  
42 by questions that combine more than one site, decreasing the precision. However, the categories are  
43  
44 fairly well demarcated anatomically save for the question regarding pain in arms/legs. Fourth, the  
45  
46 covariates collected with musculoskeletal pain at follow-up (smoking, physical activity, level of  
47  
48 education) are cross-sectional and might thus be mediators of reverse causation. However, the  
49  
50 adjusted estimates are much in line with the crude estimates.  
51  
52  
53  
54  
55  
56  
57  
58  
59  
60



1  
2  
3 Primarily, we do not suggest that low muscle strength in youth is a protective factor for later  
4 musculoskeletal pain. However, our observations could potentially be explained by both social and  
5 biological factors. It has previously been suggested that there is a U-shaped association between  
6 physical activity and later back pain.<sup>37-38</sup> ~~Furthermore, a~~ First, as former occupational exposure<sup>16</sup> and  
7 certain sport participation<sup>37</sup> are established risk factors for future MSDs,<sup>16 39</sup> it lends some evidence  
8 for a ~~more~~ general model, in which certain forms of physical activity is negative for the  
9 musculoskeletal health. It has also previously been suggested that there is a U-shaped association  
10 between physical activity and later back pain,<sup>38 39</sup> i.e. that subjects with low and high levels of physical  
11 activity has an increased risk compared to the group with average activity. Primarily, our  
12 observations do not support low muscle strength in youth as a risk factor for later musculoskeletal  
13 pain. ~~First~~ Instead, we speculate that our results ~~can~~ may be explained by muscle strength in youth  
14 being one selection criterion for future high risk activities with a negative influence on the  
15 musculoskeletal health, e.g. higher risk of joint injury due to sports participation or manual repetitive  
16 work load. This would also include more immediate exposure in youth such as more physically  
17 demanding military service.<sup>40</sup> Although we have controlled for level of education, which we regard as  
18 might serve as a proxy for occupational exposure, there is potential for residual confounding. ~~as we~~  
19 ~~did not have more appropriate data.~~ In other words, individuals with low general muscle strength  
20 might to a certain degree be deselected for high risk activities compared to stronger men. ~~with an~~  
21 ~~average or high strength.~~ A second potential explanation for our observation can be based on  
22 that ~~However, this is only one of many possible explanations. For example,~~ the strength of an  
23 individual is associated with the muscle fiber type distribution, which have a large genetic  
24 component.<sup>41</sup> Whereas Type I fibers are more common in endurance athletes<sup>42</sup>, ~~whereas a~~ high type  
25 II percentage have been reported to be associated with both isometric muscle strength<sup>43</sup> as well as  
26 low back pain.<sup>44</sup> ~~Thus, our observations could potentially be explained by both social and biological~~  
27 ~~factors.~~

1  
2  
3 It is important to note that our main result are not the significantly decreased risk of later  
4 musculoskeletal pain observed in men with low strength but the nonexistent risk increase in the  
5 same group. This is Ppartly in contrast with one of the few previous studies in the area.<sup>25</sup> ~~we did~~  
6 ~~not observe a negative effect of low muscle strength on the risk future of musculoskeletal problems~~  
7 ~~in men.~~ Although we in the present study only include measurements of isometric strength, the  
8  
9  
10  
11  
12  
13  
14 previous study<sup>25</sup> ~~reported~~observed associations with both an isometric strength measure (static two  
15  
16 hand lift) and an isotonic strength measure (bench press). In another study on the same cohort, it is  
17  
18 reported that the result in bench press, but not two hand lift, was associated with both future  
19  
20 cardiovascular fitness and future physical activity,<sup>45</sup> potentially explaining part of the difference.  
21  
22 Another study reported flexibility as a sit and reach test,<sup>24</sup> but not strength measured as sit-ups, to  
23  
24 be negatively associated with future risk of back pain. Hence, it is possible that other aspects of  
25  
26 muscular and musculoskeletal function is of greater importance of future risk of MSDs than the  
27  
28 isometric muscle strength as such.

29  
30  
31  
32 The association between muscle strength and later musculoskeletal pain diminished when we used  
33  
34 muscle strength as a continuous variable. This was not surprising, as the observed association was  
35  
36 non linear in the primary model. It is to be expected that the test offices differ somewhat in their  
37  
38 reported test results, as they were assigned adolescents based on geography. However, including  
39  
40 test offices in the model did not have any effect on the overall association. When we included work  
41  
42 capacity in the model, most risk estimates decreased in absolute values, furthering strengthening the  
43  
44 observations in the primary model. By using the relative muscle strength during testing periods of  
45  
46 five years, we partially address the potential systematic change in testing procedure over the years.  
47  
48 Although the methods of measurements have not changed at large, minor adjustments cannot be  
49  
50 excluded.  
51  
52

53  
54 In future studies, it would be of interest to investigate if low muscle strength serves as a deselection  
55  
56 criterion for professions or types of leisure time physical activity with higher risk of acute injuries or  
57  
58  
59  
60

~~chronic physical overload, factors with negative impact on musculoskeletal health. Although we found no increased risk of future musculoskeletal problems in men with low muscle strength in adolescence, future studies need to better quantify the occupational exposure and leisure time physical activity.~~ Since the physical activity pattern and physical fitness profiles differ between men and women, further investigations are also needed to investigate if similar associations can be found in women.

~~In contrast to our hypothesis, in conclusion, we observed no increased risk of self-reported musculoskeletal pain in adult men with low overall isometric muscle strength in youth. Thus, this study add no support to a model in which muscle strength is a risk factor for future musculoskeletal pain in men. We speculate that low muscle strength per se is not protective of future musculoskeletal pain. Instead, low muscle strength might serve as a deselection criterion for professions or types of leisure time physical activity with higher risk of acute injuries or chronic physical overload, factors with negative impact on musculoskeletal health.~~

## Acknowledgements

No author has a conflict of interest to report. The authors would like to thank Charlotte Bergknut for the initial data management.

## Funding

The authors are supported by grants from The Swedish Research Council, Skåne Regional Council, and the Faculty of Medicine at Lund University. The funders neither influenced the study process nor manuscript preparation.

## Author contributions

ST proposed the study idea, collected data, designed the study, and drafted the manuscript. IP designed the study and provided input during manuscript preparation. CZ designed the study and

performed the statistical analyses. ME designed the study, collected data, and provided input during manuscript preparation. All authors approved the final version of the manuscript.

## Data sharing statement

There is no additional data to share.

## References

1. Bergman S, Herrstrom P, Hogstrom K, Petersson IF, Svensson B, Jacobsson LT. Chronic musculoskeletal pain, prevalence rates, and sociodemographic associations in a Swedish population study. *J Rheumatol* 2001;28(6):1369-77.
2. Picavet HS, Schouten JS. Musculoskeletal pain in the Netherlands: prevalences, consequences and risk groups, the DMC(3)-study. *Pain* 2003;102(1-2):167-78.
3. Urwin M, Symmons D, Allison T, Brammah T, Busby H, Roxby M, et al. Estimating the burden of musculoskeletal disorders in the community: the comparative prevalence of symptoms at different anatomical sites, and the relation to social deprivation. *Ann Rheum Dis* 1998;57(11):649-55.
4. Murray CJ, Vos T, Lozano R, Naghavi M, Flaxman AD, Michaud C, et al. Disability-adjusted life years (DALYs) for 291 diseases and injuries in 21 regions, 1990-2010: a systematic analysis for the Global Burden of Disease Study 2010. *Lancet* 2013;380(9859):2197-223.
5. van der Windt DA, Thomas E, Pope DP, de Winter AF, Macfarlane GJ, Bouter LM, et al. Occupational risk factors for shoulder pain: a systematic review. *Occup Environ Med* 2000;57(7):433-42.
6. Hoogendoorn WE, van Poppel MN, Bongers PM, Koes BW, Bouter LM. Physical load during work and leisure time as risk factors for back pain. *Scand J Work Environ Health* 1999;25(5):387-403.

- 1  
2  
3 7. Felson DT, Zhang Y, Hannan MT, Naimark A, Weissman B, Aliabadi P, et al. Risk factors for incident  
4  
5 radiographic knee osteoarthritis in the elderly: the Framingham Study. *Arthritis Rheum*  
6  
7 1997;40(4):728-33.  
8
- 9  
10 8. Shiri R, Karppinen J, Leino-Arjas P, Solovieva S, Viikari-Juntura E. The association between obesity  
11  
12 and low back pain: a meta-analysis. *Am J Epidemiol* 2010;171(2):135-54.  
13
- 14  
15 9. Grotle M, Hagen KB, Natvig B, Dahl FA, Kvien TK. Obesity and osteoarthritis in knee, hip and/or  
16  
17 hand: an epidemiological study in the general population with 10 years follow-up. *BMC*  
18  
19 *Musculoskelet Disord* 2008;9:132.
- 20  
21 10. Hagen K, Zwart JA, Svebak S, Bovim G, Jacob Stovner L. Low socioeconomic status is associated  
22  
23 with chronic musculoskeletal complaints among 46,901 adults in Norway. *Scand J Public*  
24  
25 *Health* 2005;33(4):268-75.  
26
- 27  
28 11. Dalstra JA, Kunst AE, Borrell C, Breeze E, Cambois E, Costa G, et al. Socioeconomic differences in  
29  
30 the prevalence of common chronic diseases: an overview of eight European countries. *Int J*  
31  
32 *Epidemiol* 2005;34(2):316-26.
- 33  
34 12. Bengtsson C, Nordmark B, Klareskog L, Lundberg I, Alfredsson L. Socioeconomic status and the  
35  
36 risk of developing rheumatoid arthritis: results from the Swedish EIRA study. *Ann Rheum Dis*  
37  
38 2005;64(11):1588-94.
- 39  
40 13. Palmer KT, Syddall H, Cooper C, Coggon D. Smoking and musculoskeletal disorders: findings from  
41  
42 a British national survey. *Ann Rheum Dis* 2003;62(1):33-6.  
43
- 44  
45 14. Holth HS, Werpen HK, Zwart JA, Hagen K. Physical inactivity is associated with chronic  
46  
47 musculoskeletal complaints 11 years later: results from the Nord-Trøndelag Health Study.  
48  
49 *BMC Musculoskelet Disord* 2008;9:159.
- 50  
51 15. McBeth J, Jones K. Epidemiology of chronic musculoskeletal pain. *Best Pract Res Clin Rheumatol*  
52  
53 2007;21(3):403-25.  
54  
55  
56  
57  
58  
59  
60

- 1  
2  
3 16. Roquelaure Y, Ha C, Rouillon C, Fouquet N, Leclerc A, Descatha A, et al. Risk factors for upper-  
4  
5 extremity musculoskeletal disorders in the working population. *Arthritis Rheum*  
6  
7 2009;61(10):1425-34.  
8  
9  
10 17. Hakkinen A, Sokka T, Kotaniemi A, Hannonen P. A randomized two-year study of the effects of  
11  
12 dynamic strength training on muscle strength, disease activity, functional capacity, and bone  
13  
14 mineral density in early rheumatoid arthritis. *Arthritis Rheum* 2001;44(3):515-22.  
15  
16 18. Baker KR, Nelson ME, Felson DT, Layne JE, Sarno R, Roubenoff R. The efficacy of home based  
17  
18 progressive strength training in older adults with knee osteoarthritis: a randomized  
19  
20 controlled trial. *J Rheumatol* 2001;28(7):1655-65.  
21  
22 19. Hamberg-van Reenen HH, Ariens GA, Blatter BM, van Mechelen W, Bongers PM. A systematic  
23  
24 review of the relation between physical capacity and future low back and neck/shoulder  
25  
26 pain. *Pain* 2007;130(1-2):93-107.  
27  
28  
29 20. Leino P, Aro S, Hasan J. Trunk muscle function and low back disorders: a ten-year follow-up study.  
30  
31 *J Chronic Dis* 1987;40(4):289-96.  
32  
33 21. Kujala UM, Taimela S, Viljanen T, Jutila H, Viitasalo JT, Videman T, et al. Physical loading and  
34  
35 performance as predictors of back pain in healthy adults. A 5-year prospective study. *Eur J*  
36  
37 *Appl Physiol Occup Physiol* 1996;73(5):452-8.  
38  
39  
40 22. Faber A, Sell L, Hansen JV, Burr H, Lund T, Holtermann A, et al. Does muscle strength predict  
41  
42 future musculoskeletal disorders and sickness absence? *Occupational medicine (Oxford,*  
43  
44 *England)* 2012;62(1):41-6.  
45  
46 23. Ruiz JR, Castro-Pinero J, Artero EG, Ortega FB, Sjostrom M, Suni J, et al. Predictive validity of  
47  
48 health-related fitness in youth: a systematic review. *Br J Sports Med* 2009;43(12):909-23.  
49  
50  
51 24. Mikkelsen LO, Nupponen H, Kaprio J, Kautiainen H, Mikkelsen M, Kujala UM. Adolescent  
52  
53 flexibility, endurance strength, and physical activity as predictors of adult tension neck, low  
54  
55 back pain, and knee injury: a 25 year follow up study. *Br J Sports Med* 2006;40(2):107-13.  
56  
57  
58  
59  
60

- 1  
2  
3 25. Barnekow-Bergkvist M, Hedberg GE, Janlert U, Jansson E. Determinants of self-reported neck-  
4  
5 shoulder and low back symptoms in a general population. *Spine (Phila Pa 1976)*  
6  
7 1998;23(2):235-43.  
8  
9  
10 26. Neovius M, Sundstrom J, Rasmussen F. Combined effects of overweight and smoking in late  
11  
12 adolescence on subsequent mortality: nationwide cohort study. *BMJ* 2009;338:b496.  
13  
14 27. Nilsson PM, Nyberg P, Ostergren PO. Increased susceptibility to stress at a psychological  
15  
16 assessment of stress tolerance is associated with impaired fetal growth. *Int J Epidemiol*  
17  
18 2001;30(1):75-80.  
19  
20 28. Hemmingsson T, Melin B, Allebeck P, Lundberg I. The association between cognitive ability  
21  
22 measured at ages 18-20 and mortality during 30 years of follow-up--a prospective  
23  
24 observational study among Swedish males born 1949-51. *Int J Epidemiol* 2006;35(3):665-70.  
25  
26 29. von Elm E, Altman DG, Egger M, Pocock SJ, Gotsche PC, Vandenbroucke JP. Strengthening the  
27  
28 Reporting of Observational Studies in Epidemiology (STROBE) statement: guidelines for  
29  
30 reporting observational studies. *BMJ* 2007;335(7624):806-8.  
31  
32  
33 30. Nordesjo LO, Schéle R. Validity of Ergometer Cycle Test and Measures of Isometric Muscle  
34  
35 Strength when Predicting some Aspects of Military Performance. *Swedish J Defence Med*  
36  
37 1974(10):11-23.  
38  
39  
40 31. Wolk A, Rossner S. Effects of smoking and physical activity on body weight: developments in  
41  
42 Sweden between 1980 and 1989. *J Intern Med* 1995;237(3):287-91.  
43  
44 32. Sundquist J, Johansson SE. The influence of socioeconomic status, ethnicity and lifestyle on body  
45  
46 mass index in a longitudinal study. *Int J Epidemiol* 1998;27(1):57-63.  
47  
48  
49 33. Bygren LO, Konlaan BB, Johansson SE. Attendance at cultural events, reading books or  
50  
51 periodicals, and making music or singing in a choir as determinants for survival: Swedish  
52  
53 interview survey of living conditions. *BMJ* 1996;313(7072):1577-80.  
54  
55 34. Tornvall G. Assessment of physical capabilities. *Acta physiologica Scandinavica* 1963;58(Suppl  
56  
57 201):1-102.  
58  
59  
60

- 1  
2  
3 35. Nordesjo LO. A comparison between the Thornvall maximal ergometer test, submaximal  
4 ergometer tests and maximal oxygen uptake. *Swedish J Defence Med* 1974(10):3-10.  
5  
6  
7 36. Nordesjo LO. Estimation of the maximal work rate sustainable for 6 minutes using a single-level  
8 load or stepwise increasing loads. *Ups J Med Sci* 1974;79(1):45-50.  
9  
10  
11 ~~37. Heneweer H, Vanhees L, Picavet HS. Physical activity and low back pain: a U-shaped relation?~~  
12 ~~*Pain* 2009;143(1-2):21-5.~~  
13  
14  
15  
16 378. Heneweer H, Picavet HS, Staes F, Kiers H, Vanhees L. Physical fitness, rather than self-reported  
17 physical activities, is more strongly associated with low back pain: evidence from a working  
18 population. *Eur Spine J* 2012;21(7):1265-72.  
19  
20  
21  
22  
23 389. Kujala UM, Kettunen J, Paananen H, Aalto T, Battie MC, Impivaara O, et al. Knee osteoarthritis in  
24 former runners, soccer players, weight lifters, and shooters. *Arthritis Rheum* 1995;38(4):539-  
25 46.  
26  
27  
28  
29 ~~397. Heneweer H, Vanhees L, Picavet HS. Physical activity and low back pain: a U-shaped relation?~~  
30 ~~*Pain* 2009;143(1-2):21-5.~~  
31  
32  
33  
34  
35 40. Almeida SA, Williams KM, Shaffer RA, Brodine SK. Epidemiological patterns of musculoskeletal  
36 injuries and physical training. *Med Sci Sports Exerc* 1999;31(8):1176-82.  
37  
38  
39 41. Simoneau JA, Bouchard C. Genetic determinism of fiber type proportion in human skeletal  
40 muscle. *FASEB J* 1995;9(11):1091-5.  
41  
42  
43 42. Costill DL, Daniels J, Evans W, Fink W, Krahenbuhl G, Saltin B. Skeletal muscle enzymes and fiber  
44 composition in male and female track athletes. *J Appl Physiol* 1976;40(2):149-54.  
45  
46  
47 43. Tesch P, Karlsson J. Isometric strength performance and muscle fibre type distribution in man.  
48 *Acta physiologica Scandinavica* 1978;103(1):47-51.  
49  
50  
51  
52 44. Mannion AF, Weber BR, Dvorak J, Grob D, Muntener M. Fibre type characteristics of the lumbar  
53 paraspinal muscles in normal healthy subjects and in patients with low back pain. *J Orthop*  
54 *Res* 1997;15(6):881-7.  
55  
56  
57  
58  
59  
60



- 1  
2  
3 45. Barnekow-Bergkvist M, Hedberg G, Janlert U, Jansson E. Prediction of physical fitness and  
4  
5 physical activity level in adulthood by physical performance and physical activity in  
6  
7 adolescence--an 18-year follow-up study. *Scand J Med Sci Sports* 1998;8(5 Pt 1):299-308.  
8  
9  
10

## 11 12 13 **Tables and Figures**

14  
15  
16 **Table 1:** Description of study sample

17  
18 **Table 2:** Risk estimates for the muscle strength in youth as a determinant of self-reported  
19  
20 musculoskeletal pain in adulthood  
21

22  
23 **Figure 1:** The identification of the study sample and the loss to follow-up  
24  
25  
26  
27  
28  
29  
30  
31  
32  
33  
34  
35  
36  
37  
38  
39  
40  
41  
42  
43  
44  
45  
46  
47  
48  
49  
50  
51  
52  
53  
54  
55  
56  
57  
58  
59  
60

Table 1 Description of study sample

|                                           |                        |
|-------------------------------------------|------------------------|
| <b>Number of men</b>                      | 5489                   |
| <b>Mean age at baseline (SD)</b>          | 18.2 (0.5)             |
| <b>Mean time to follow-up (SD, range)</b> | 17.2 years (8.4, 1-35) |
| <b>Mean hand grip* (SD)</b>               | 617 (98)               |
| <b>Mean elbow flexion* (SD)</b>           | 385 (83)               |
| <b>Mean knee extension* (SD)</b>          | 567 (116)              |
| <b>Muscle Strength (%)</b>                |                        |
| Low                                       | 1371 (25.0)            |
| Average                                   | 2747 (50.0)            |
| High                                      | 1371 (25.0)            |
| <b>BMI (%)</b>                            |                        |
| <18.5                                     | 477 (8.7)              |
| 18.5-24.9                                 | 4498 (81.9)            |
| 25-29.9                                   | 448 (8.2)              |
| >30                                       | 66 (1.2)               |
| <b>Type of interview (%)</b>              |                        |
| In person                                 | 4349 (79.2)            |
| By telephone                              | 1140 (20.8)            |
| <b>Pain in back/hips (%)</b>              |                        |
| Yes                                       | 1645 (30.0)            |
| of which severe                           | 321 (5.8)              |
| No                                        | 3842 (70.0)            |
| Missing                                   | 2 (0.0)                |
| <b>Pain in neck/shoulders (%)</b>         |                        |
| Yes                                       | 1562 (28.5)            |
| of which severe                           | 246 (4.5)              |
| No                                        | 3925 (71.5)            |
| Missing                                   | 2 (0.0)                |
| <b>Pain in arms/legs (%)</b>              |                        |
| Yes                                       | 1243 (22.6)            |
| of which severe                           | 196 (3.6)              |
| No                                        | 4243 (77.3)            |
| Missing                                   | 3 (0.0)                |
| <b>Pain, independent of location (%)</b>  |                        |
| Yes                                       | 2847 (51.9)            |
| of which severe                           | 576 (10.5)             |
| No                                        | 2639 (48.1)            |
| Missing                                   | 3 (0.0)                |
| <b>Smoking status (%)</b>                 |                        |
| Yes                                       | 827 (15.1)             |
| No                                        | 4662 (84.9)            |
| <b>Level of education (%)</b>             |                        |
| Compulsory                                | 589 (10.7)             |
| Secondary                                 | 2889 (52.6)            |
| Higher                                    | 2011 (36.6)            |
| <b>Physical Activity (%)</b>              |                        |
| Practically non                           | 583 (10.6)             |
| Now and then                              | 1613 (29.4)            |
| Regularly                                 | 2077 (37.8)            |
| Regularly strenuous                       | 1216 (22.2)            |

\* In Newton.

**Table 2** Risk estimates for the muscle strength in youth as a determinant of self-reported musculoskeletal pain in adulthood

| Outcomes                    | Models                        |                                   |                         |                                              |                     |
|-----------------------------|-------------------------------|-----------------------------------|-------------------------|----------------------------------------------|---------------------|
|                             | Univariate<br>Muscle strength |                                   |                         | Multivariate <sup>a</sup><br>Muscle strength |                     |
|                             | Low (N=1371)<br>RR (N)        | Average (N=2747)<br>Reference (N) | High (N=1371)<br>RR (N) | Low<br>RR (95% CI)                           | High<br>RR (95% CI) |
| Musculoskeletal pain        | 0.92 (668)                    | 1 (1457)                          | 0.99 (722)              | 0.93 (0.87-0.99)                             | 0.99 (0.93-1.05)    |
| Severe musculoskeletal pain | 0.96 (135)                    | 1 (283)                           | 1.12 (158)              | 0.96 (0.79-1.18)                             | 1.07 (0.89-1.29)    |
| Pain in back/hips           | 0.92 (384)                    | 1 (832)                           | 1.03 (429)              | 0.93 (0.84-1.03)                             | 1.03 (0.94-1.13)    |
| Pain in neck/shoulders      | 0.92 (366)                    | 1 (799)                           | 0.99 (397)              | 0.93 (0.83-1.03)                             | 1.00 (0.90-1.10)    |
| Pain in arms/legs           | 0.97 (297)                    | 1 (616)                           | 1.07 (330)              | 0.97 (0.86-1.10)                             | 1.06 (0.94-1.19)    |

N= Number of cases

RR= Relative risk estimates

CI= Confidence interval

a= adjusted for smoking status, physical activity, education, body mass index

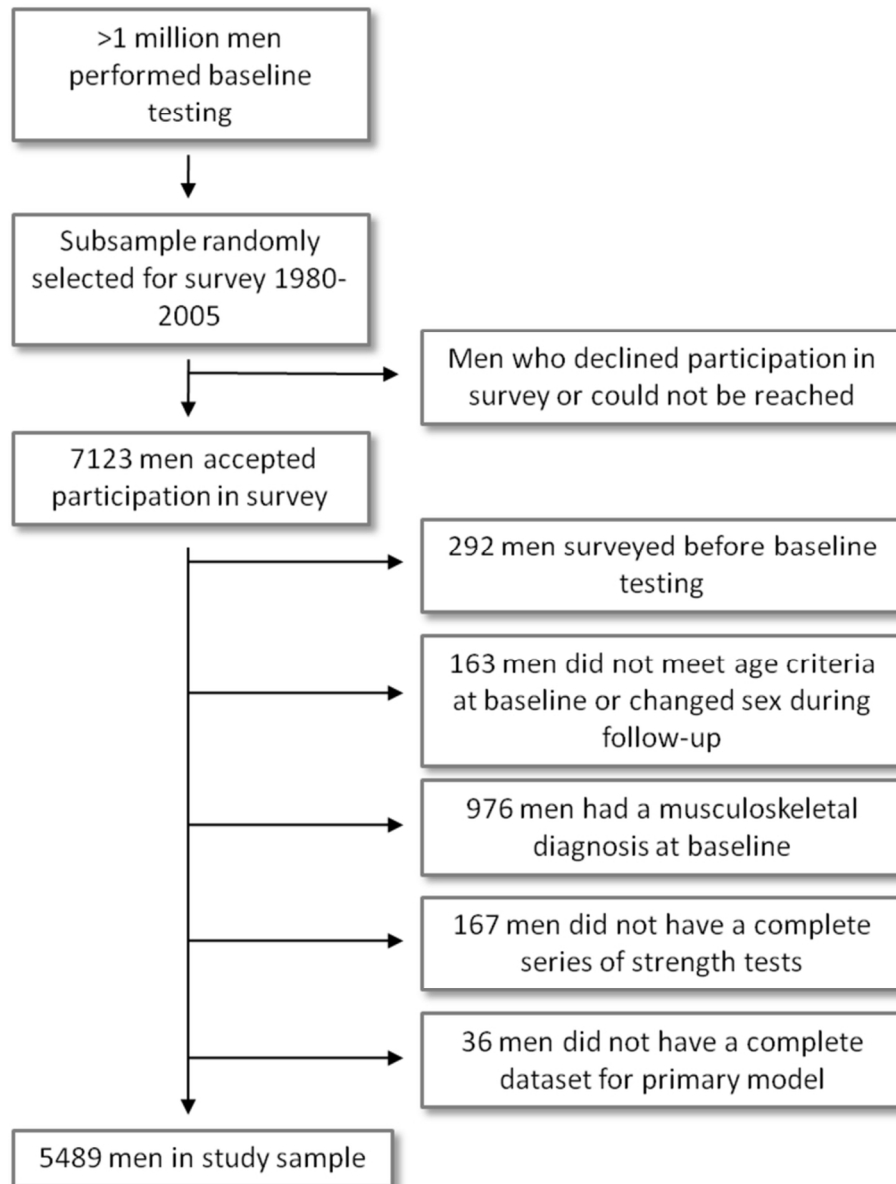

90x118mm (300 x 300 DPI)

STROBE 2007 (v4) Statement—Checklist of items that should be included in reports of cohort studies

| Section/Topic             | Item # | Recommendation                                                                                                                                                                       | Reported on page # |
|---------------------------|--------|--------------------------------------------------------------------------------------------------------------------------------------------------------------------------------------|--------------------|
| Title and abstract        | 1      | (a) Indicate the study’s design with a commonly used term in the title or the abstract                                                                                               | 1                  |
|                           |        | (b) Provide in the abstract an informative and balanced summary of what was done and what was found                                                                                  | 2-3                |
| <b>Introduction</b>       |        |                                                                                                                                                                                      |                    |
| Background/rationale      | 2      | Explain the scientific background and rationale for the investigation being reported                                                                                                 | 5-6                |
| Objectives                | 3      | State specific objectives, including any prespecified hypotheses                                                                                                                     | 6                  |
| <b>Methods</b>            |        |                                                                                                                                                                                      |                    |
| Study design              | 4      | Present key elements of study design early in the paper                                                                                                                              | 6+                 |
| Setting                   | 5      | Describe the setting, locations, and relevant dates, including periods of recruitment, exposure, follow-up, and data collection                                                      | 6-9                |
| Participants              | 6      | (a) Give the eligibility criteria, and the sources and methods of selection of participants. Describe methods of follow-up                                                           | 6-7                |
|                           |        | (b) For matched studies, give matching criteria and number of exposed and unexposed                                                                                                  | -                  |
| Variables                 | 7      | Clearly define all outcomes, exposures, predictors, potential confounders, and effect modifiers. Give diagnostic criteria, if applicable                                             | 6-9                |
| Data sources/ measurement | 8*     | For each variable of interest, give sources of data and details of methods of assessment (measurement). Describe comparability of assessment methods if there is more than one group | 6-9                |
| Bias                      | 9      | Describe any efforts to address potential sources of bias                                                                                                                            | 9                  |
| Study size                | 10     | Explain how the study size was arrived at                                                                                                                                            | Figure 1           |
| Quantitative variables    | 11     | Explain how quantitative variables were handled in the analyses. If applicable, describe which groupings were chosen and why                                                         | 6-9                |
| Statistical methods       | 12     | (a) Describe all statistical methods, including those used to control for confounding                                                                                                | 9                  |
|                           |        | (b) Describe any methods used to examine subgroups and interactions                                                                                                                  | 9                  |
|                           |        | (c) Explain how missing data were addressed                                                                                                                                          | -                  |
|                           |        | (d) If applicable, explain how loss to follow-up was addressed                                                                                                                       | -                  |
|                           |        | (e) Describe any sensitivity analyses                                                                                                                                                | 9                  |
| <b>Results</b>            |        |                                                                                                                                                                                      |                    |

|                          |     |                                                                                                                                                                                                              |          |
|--------------------------|-----|--------------------------------------------------------------------------------------------------------------------------------------------------------------------------------------------------------------|----------|
| Participants             | 13* | (a) Report numbers of individuals at each stage of study—eg numbers potentially eligible, examined for eligibility, confirmed eligible, included in the study, completing follow-up, and analysed            | Figure 1 |
|                          |     | (b) Give reasons for non-participation at each stage                                                                                                                                                         | Figure 1 |
|                          |     | (c) Consider use of a flow diagram                                                                                                                                                                           | Figure 1 |
| Descriptive data         | 14* | (a) Give characteristics of study participants (eg demographic, clinical, social) and information on exposures and potential confounders                                                                     | Table 1  |
|                          |     | (b) Indicate number of participants with missing data for each variable of interest                                                                                                                          | Table 1  |
|                          |     | (c) Summarise follow-up time (eg, average and total amount)                                                                                                                                                  | Table 1  |
| Outcome data             | 15* | Report numbers of outcome events or summary measures over time                                                                                                                                               | Table 1  |
| Main results             | 16  | (a) Give unadjusted estimates and, if applicable, confounder-adjusted estimates and their precision (eg, 95% confidence interval). Make clear which confounders were adjusted for and why they were included | Table 1  |
|                          |     | (b) Report category boundaries when continuous variables were categorized                                                                                                                                    | 6-9      |
|                          |     | (c) If relevant, consider translating estimates of relative risk into absolute risk for a meaningful time period                                                                                             | -        |
| Other analyses           | 17  | Report other analyses done—eg analyses of subgroups and interactions, and sensitivity analyses                                                                                                               | 9        |
| <b>Discussion</b>        |     |                                                                                                                                                                                                              |          |
| Key results              | 18  | Summarise key results with reference to study objectives                                                                                                                                                     | 10-11    |
| <b>Limitations</b>       |     |                                                                                                                                                                                                              |          |
| Interpretation           | 20  | Give a cautious overall interpretation of results considering objectives, limitations, multiplicity of analyses, results from similar studies, and other relevant evidence                                   | 13-14    |
| Generalisability         | 21  | Discuss the generalisability (external validity) of the study results                                                                                                                                        | 12-13    |
| <b>Other information</b> |     |                                                                                                                                                                                                              |          |
| Funding                  | 22  | Give the source of funding and the role of the funders for the present study and, if applicable, for the original study on which the present article is based                                                | 14       |

\*Give information separately for cases and controls in case-control studies and, if applicable, for exposed and unexposed groups in cohort and cross-sectional studies.

**Note:** An Explanation and Elaboration article discusses each checklist item and gives methodological background and published examples of transparent reporting. The STROBE checklist is best used in conjunction with this article (freely available on the Web sites of PLoS Medicine at <http://www.plosmedicine.org/>, Annals of Internal Medicine at <http://www.annals.org/>, and Epidemiology at <http://www.epidem.com/>). Information on the STROBE Initiative is available at [www.strobe-statement.org](http://www.strobe-statement.org).
